# Supplementary material for: Panproteome-wide analysis of antibody responses to whole cell pneumococcal vaccination
Source: eLife journal article supplement (doi:10.7554/elife.37015), 2018-12-28

**(A)**

Diagram illustrating the genomic organization of the *cps* locus in *OXC141* and *RM200* strains. The *OXC141* strain (top) shows a large red block covering the entire *cps* locus, indicating a deletion. The *RM200* strain (bottom) shows a red bar below the *cps* locus, indicating the extent of homologous recombination. The map includes genes *luxS*, *dexB*, *cps* locus, *aliA*, and *pbp1a*. A 5 kb scale bar is shown.

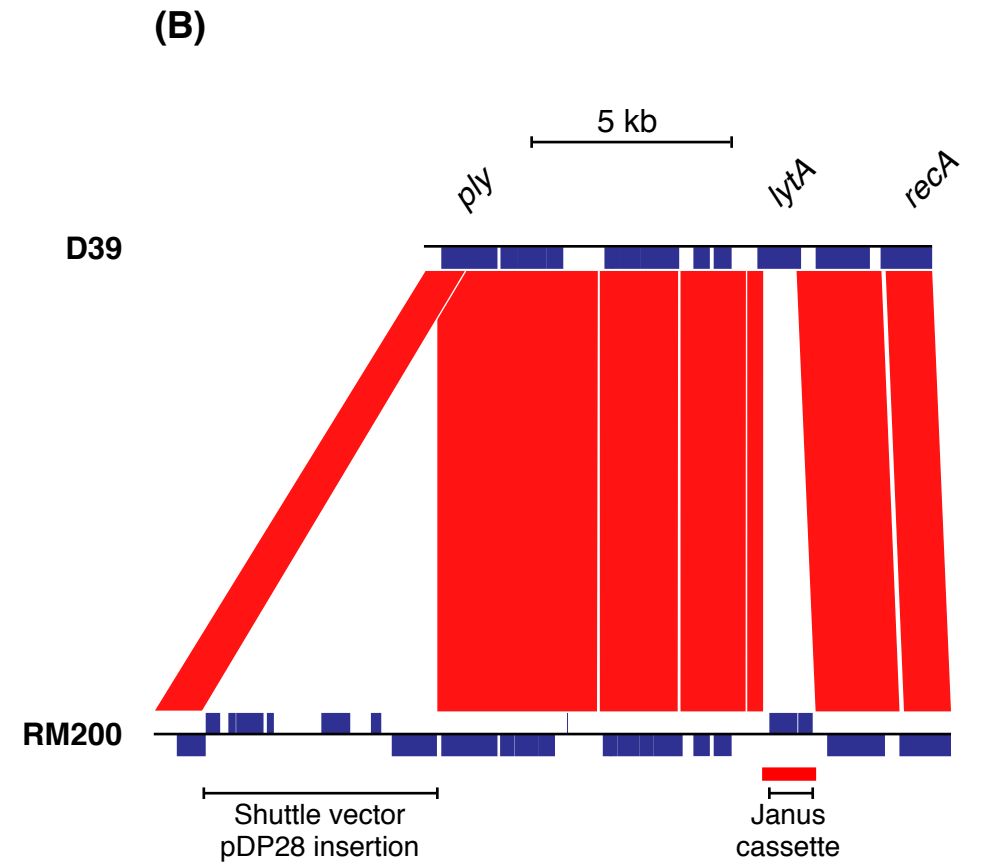

Supplement: supp [file elife_poa_e37015_Figure_1_figure_supplement_1.pdf › elife_poa_e37015_Figure_1_figure_supplement_1.pdf]
