# Supplementary material for: Panproteome-wide analysis of antibody responses to whole cell pneumococcal vaccination
Source: eLife. 2018 Dec 28;7:e37015. doi: 10.7554/eLife.37015 (PMC6344088; doi:10.7554/eLife.37015)
Supplement: Supplementary file 1. — The 2190 proteins on the array selected based on the pneumococcal population in Massachusetts (Croucher et al., 2013b) are annotated and functionally classified in the first four columns, as described previously (Croucher et al., 2017). The four columns on the right show the distribution of these protein in S. pneumoniae RM200, the strain included in the WCV, as well as representatives of two closely-related species: S. mitis B6, and S. pseudopneumoniae IS7493. Where a protein is absent from a genome, there is a dash in the corresponding cell; otherwise, the sequence identity calculated from a pairwise alignment of protein sequences with MAFFT is shown. [file elife-37015-supp1.xlsx]

## Sheet: Supplementary File 1
Protein	Protein type	Gene name	TIGR4 orthologue	Median normalised IgG binding	Classification by Giefing et al	Classification in Croucher et al	S. pneumoniae RM200	S. pseudopneumoniae IS7493	S. mitis B6	S. mutans UA159
CBD	Additional	-	-	1.30783	-	non-ABT	0	0	0	0
CLS00001	COG	adcA	SP_2169	0.399692	non-ABT	non-ABT	99.2016	99.002	99.4012	62.549
CLS00002	COG	adcB	SP_2170	0.224625	non-ABT	non-ABT	100	98.5075	99.2537	72.2222
CLS00003	COG	adcC	SP_2171	0	non-ABT	non-ABT	100	98.7179	97.4359	77.5424
CLS00004	COG	adcR	SP_2172	0	non-ABT	non-ABT	100	96.5753	98.6301	57.7181
CLS00005	COG	dltD	SP_2173	0.87762	non-ABT	non-ABT	99.5261	96.4455	95.4976	52.7187
CLS00006	COG	dltC	SP_2174	0.033927	non-ABT	non-ABT	100	100	100	88.6076
CLS00007	COG	dltB	SP_2175	0.0702223	non-ABT	non-ABT	99.2754	98.5507	97.5845	70.2381
CLS00008	COG	dltA	SP_2176	0.668793	non-ABT	non-ABT	99.8062	97.4806	97.6744	79.0698
CLS00009	COG	-	SP_2180	0.192685	ABT	non-ABT	99.2347	0	95.4082	0
CLS00010	COG	ltrA	SP_2181	0.279221	non-ABT	non-ABT	58.4337	46.2006	45.4333	10.7843
CLS00011	COG	-	SP_2182	3.27241	non-ABT	ABT	98.9744	0	0	0
CLS00012	COG	-	SP_2183	0.0769004	non-ABT	non-ABT	98.5075	0	0	0
CLS00013	COG	glpF	SP_2184	0.121541	non-ABT	non-ABT	99.1453	98.7179	98.2906	0
CLS00014	COG	glpO	SP_2185	0.195083	non-ABT	non-ABT	99.6711	98.1908	97.8618	0
CLS00015	COG	glpK	SP_2186	0.343612	non-ABT	non-ABT	100	98.6056	99.004	0
CLS00016	COG	-	SP_2187	0.201935	non-ABT	non-ABT	99.1471	95.9488	95.9488	0
CLS00017	COG	hslO	SP_2188	2.26785	non-ABT	non-ABT	100	97.931	97.931	76.0274
CLS00018	COG	dus	SP_2189	0.367721	non-ABT	non-ABT	99.6933	98.1595	96.9325	77.6758
CLS00020	COG	-	SP_2191	0.471983	non-ABT	non-ABT	98.8571	0	0	0
CLS00021	COG	yycG	SP_2192	0.418272	non-ABT	non-ABT	100	0	0	0
CLS00022	COG	phoB	SP_2193	0.888957	non-ABT	non-ABT	100	0	0	0
CLS00023	COG	clpC	SP_2194	0.909677	ABT	non-ABT	99.3827	99.0123	98.642	66.8704
CLS00024	COG	ctsR	SP_2195	0	non-ABT	non-ABT	98.6842	98.6842	95.3947	59.0909
CLS00026	COG	tauA	SP_2197	0.847551	non-ABT	non-ABT	99.7015	98.5075	98.806	0
CLS00027	COG	tauC	SP_2198	0.119003	non-ABT	non-ABT	99.2063	97.2222	98.0159	0
CLS00028	COG	-	SP_2199	0.0333762	non-ABT	non-ABT	98.9583	96.875	97.9167	0
CLS00029	CellWall	cbpD	SP_2201	2.8903	ABT	ABT	98.6607	78.7946	76.3393	0
CLS00030	COG	-	SP_2202	0	non-ABT	non-ABT	100	95.4545	97.7273	0
CLS00031	COG	dnaC	SP_2203	0.592411	non-ABT	non-ABT	100	99.7778	99.3333	74.4493
CLS00032	COG	rplI	SP_2204	0.229558	ABT	non-ABT	100	99.3333	98.6667	72
CLS00033	COG	-	SP_2205	0.645144	non-ABT	non-ABT	100	98.7823	88.7367	54.6282
CLS00034	COG	yfiA	SP_2206	0.118325	non-ABT	non-ABT	100	98.3516	96.7033	72.4324
CLS00035	COG	comFC	SP_2207	0.0432807	non-ABT	non-ABT	99.5455	94.5455	89.0909	0
CLS00036	COG	comFA	SP_2208	0.787564	non-ABT	non-ABT	99.3056	96.7593	92.8241	58.4296
CLS00037	COG	yigZ	SP_2209	0.220864	non-ABT	non-ABT	100	99.5261	97.6303	59.2417
CLS00038	COG	cysK	SP_2210	0.575876	non-ABT	non-ABT	100	96.7532	97.7273	75.974
CLS00039	COG	-	SP_2211	0.121619	non-ABT	non-ABT	100	31.6981	32.0755	0
CLS00040	COG	-	SP_2212	0.0491124	non-ABT	non-ABT	98.5401	76.5517	53.2544	0
CLS00041	COG	-	SP_2213	0	non-ABT	non-ABT	99.1379	95.6897	92.2414	0
CLS00042	COG	tsf	SP_2214	0.066245	non-ABT	non-ABT	99.711	96.5318	99.422	83.046
CLS00043	COG	rpsB	SP_2215	0.65478	non-ABT	non-ABT	99.6139	99.6139	99.2278	89.272
CLS00044	CellWall	pcsB	SP_2216	4.60543	ABT	ABT	99.7449	96.9388	85.3012	50.3432
CLS00045	COG	mreD	SP_2217	0.347675	non-ABT	non-ABT	100	99.3902	86.5854	0
CLS00046	CellWall	mreC	SP_2218	3.06101	non-ABT	ABT	100	95.9559	96.3235	0
CLS00047	COG	ecfT	SP_2219	0.257013	non-ABT	non-ABT	100	98.8636	98.4848	68.9394
CLS00048	COG	ecfA2	SP_2220	0.485028	non-ABT	non-ABT	99.2832	96.4158	96.0573	70
CLS00049	COG	ecfA1	SP_2221	0	non-ABT	non-ABT	99.6364	96.3636	96.7273	69.2857
CLS00050	COG	pgsA	SP_2222	0.241055	non-ABT	non-ABT	99.4475	98.3425	95.5801	70.3297
CLS00051	COG	-	SP_2223	2.9643	non-ABT	ABT	100	95	83.3935	0
CLS00052	COG	-	SP_2224	1.46218	non-ABT	non-ABT	98.3607	92.5059	92.9742	0
CLS00053	COG	-	SP_2225	0.693342	non-ABT	non-ABT	99.5192	95.9135	93.75	0
CLS00054	COG	-	SP_2226	0.332567	non-ABT	non-ABT	100	99.1803	90.9836	0
CLS00055	COG	recF	SP_2227	0	non-ABT	non-ABT	99.726	97.8082	97.2603	64.1096
CLS00056	COG	guaB	SP_2228	1.46617	non-ABT	non-ABT	100	99.5935	99.5935	91.2779
CLS00057	COG	trpS	SP_2229	0.620056	non-ABT	non-ABT	100	98.5337	98.2405	80.9384
CLS00058	COG	-	SP_2230	0.217075	non-ABT	non-ABT	52.2222	99.4444	99.4444	90.1852
CLS00059	COG	-	SP_2231	0.0688896	non-ABT	non-ABT	99.1765	94.9412	93.0588	45.6977
CLS00060	COG	-	SP_2233	0.394023	non-ABT	non-ABT	97.6471	26.7045	26.8182	16.0671
CLS00061	COG	-	SP_2234	0.136574	non-ABT	non-ABT	100	97.2222	97.2222	0
CLS00062	COG	comE	SP_2235	0.0977322	non-ABT	non-ABT	99.6	99.6	99.2	0
CLS00063	COG	comD	SP_2236	0.171355	non-ABT	non-ABT	98.4127	92.0635	90.0227	0
CLS00064	COG	comC	SP_2237	0	non-ABT	non-ABT	0	0	0	0
CLS00065	COG	rlmH	SP_2238	0.603734	non-ABT	non-ABT	100	95.5975	91.195	70.4403
CLS00066	Degradative	htrA	SP_2239	2.77119	non-ABT	ABT	98.4887	97.733	97.2292	53.1863
CLS00067	COG	parB	SP_2240	0.433067	non-ABT	non-ABT	98.0159	0	94.4444	50
CLS00068	COG	dnaA	SP_0001	0.428922	non-ABT	non-ABT	100	98.234	95.3642	58.5153
CLS00069	COG	dnaN	SP_0002	0.242171	non-ABT	non-ABT	99.4709	98.9418	97.3545	75.1323
CLS00070	COG	-	SP_0003	0	non-ABT	non-ABT	76.8293	71.9512	74.3902	0
CLS00071	COG	ychF	SP_0004	1.24875	non-ABT	non-ABT	100	99.7305	99.1914	91.9137
CLS00072	COG	pth	SP_0005	0.527589	non-ABT	non-ABT	98.4127	96.2963	95.2381	67.1958
CLS00073	COG	trcF	SP_0006	0.617186	non-ABT	non-ABT	99.5723	96.2361	95.2951	62.7986
CLS00074	COG	hslR	SP_0007	0	non-ABT	non-ABT	100	100	100	83.3333
CLS00075	COG	-	SP_0008	0.986296	non-ABT	non-ABT	100	97.541	98.3607	0
CLS00076	COG	-	SP_0009	0.0664135	non-ABT	non-ABT	0	0	0	0
CLS00077	COG	-	SP_0010	0	non-ABT	non-ABT	99.5261	96.9194	97.1564	0
CLS00078	COG	tilS	SP_0011	0.440838	non-ABT	non-ABT	99.0588	96.7059	92	46.4789
CLS00079	COG	hpt	SP_0012	0.0335701	non-ABT	non-ABT	100	97.7778	97.7778	72.7778
CLS00080	COG	ftsH	SP_0013	1.00106	non-ABT	non-ABT	99.6933	97.0859	95.5521	74.4681
CLS00081	COG	-	-	0	-	non-ABT	0	0	0	0
CLS00082	COG	-	SP_1905	0.456213	non-ABT	non-ABT	99.2188	53.7143	48.2412	0
CLS00083	COG	-	SP_0018	0.0905914	non-ABT	non-ABT	97.4359	85.8974	78.2051	0
CLS00084	COG	purA	SP_0019	0	non-ABT	non-ABT	100	99.5475	99.3213	87.3589
CLS00085	COG	tadA	SP_0020	0.1582	non-ABT	non-ABT	98.7097	96.7742	94.8387	75
CLS00086	COG	-	-	0	-	non-ABT	0	0	0	0
CLS00089	COG	-	-	0.164145	-	non-ABT	0	0	0	0
CLS00090	COG	relE	-	0.00268283	-	non-ABT	0	0	0	0
CLS00091	COG	-	-	0.0460708	-	non-ABT	0	0	0	0
CLS00092	COG	-	-	0	-	non-ABT	0	0	0	0
CLS00093	COG	-	-	0.0237834	-	non-ABT	0	0	0	0
CLS00094	COG	-	-	0	-	non-ABT	0	0	0	0
CLS00095	COG	-	-	0.0380932	-	non-ABT	0	0	0	0
CLS00096	COG	-	-	0	-	non-ABT	0	0	0	0
CLS00098	COG	-	-	0.596264	-	non-ABT	0	0	0	0
CLS00099	COG	dut	SP_0021	0.156864	non-ABT	non-ABT	100	98.6395	97.9592	80.2721
CLS00100	COG	-	SP_0022	0.366099	non-ABT	non-ABT	99.4595	82.7027	0	0
CLS00101	COG	radA	SP_0023	1.06938	non-ABT	non-ABT	99.7619	94.2857	98.8095	80.0429
CLS00102	COG	-	SP_0024	0.0403139	non-ABT	non-ABT	87.234	87.766	79.7872	67.0213
CLS00103	COG	-	SP_0026	0.327809	non-ABT	non-ABT	96.8037	77.1218	74.5387	0
CLS00104	COG	-	SP_0027	0.724672	non-ABT	non-ABT	99.6894	98.7578	98.1366	86.646
CLS00105	COG	-	SP_0029	0.0791725	non-ABT	non-ABT	97.4026	0	0	0
CLS00106	COG	-	SP_1481	0.63431	non-ABT	non-ABT	70.9402	53.8462	0	0
CLS00107	COG	polA	SP_0032	1.50171	non-ABT	non-ABT	99.2126	97.3003	96.4004	71.9101
CLS00108	COG	yccU	SP_0033	0	non-ABT	non-ABT	100	100	96.5517	0
CLS00109	COG	yeiH	SP_0034	0.233665	non-ABT	non-ABT	99.7024	98.8095	96.4286	63.9296
CLS00110	COG	araT	SP_0035	0.205154	non-ABT	non-ABT	100	99.4859	98.7147	76.7263
CLS00112	COG	plsX	SP_0037	1.6282	non-ABT	non-ABT	99.697	98.4848	98.1818	81.3253
CLS00113	COG	acpP2	SP_0038	0.0650614	non-ABT	non-ABT	0	93.5065	0	0
CLS00114	COG	-	SP_2138	0.212125	non-ABT	non-ABT	88.5965	51.1628	71.3178	13.125
CLS00115	COG	blpO	SP_0541	0.192053	non-ABT	non-ABT	96.0526	93.4211	0	0
CLS00118	COG	pfgR	-	0.520671	-	non-ABT	0	98.9899	0	0
CLS00119	COG	pcyA	-	0.355885	-	non-ABT	0	97.9592	0	0
CLS00120	COG	pcyB	-	0	-	non-ABT	0	98.4127	0	0
CLS00121	COG	pcyD	-	0	-	non-ABT	0	99.4949	0	0
CLS00122	COG	comA	SP_0042	0.0456739	non-ABT	non-ABT	99.5828	99.0264	98.7483	0
CLS00123	COG	comB	SP_0043	2.99067	non-ABT	ABT	99.5546	96.6592	95.3229	0
CLS00124	COG	purC	SP_0044	0.389965	non-ABT	non-ABT	99.1489	92.3695	78.4247	85.5319
CLS00125	COG	purL	SP_0045	1.86587	non-ABT	non-ABT	99.3554	97.502	95.8904	87.0266
CLS00126	COG	purF	SP_0046	0	non-ABT	non-ABT	99.1667	98.5417	98.5417	89.375
CLS00127	COG	purM	SP_0047	0.609688	non-ABT	non-ABT	99.7059	97.3529	97.0588	91.1765
CLS00128	COG	purN	SP_0048	0.163898	non-ABT	non-ABT	100	87.5	88.5246	77.7174
CLS00129	COG	vanZ	SP_0049	0.234824	non-ABT	non-ABT	100	0	0	0
CLS00130	COG	purH	SP_0050	0.823921	non-ABT	non-ABT	97.8641	95.7282	96.8932	91.068
CLS00131	COG	purD	SP_0051	0.146726	non-ABT	non-ABT	99.0476	94.7619	92.1615	86.6667
CLS00132	COG	purE	SP_0053	0.829459	non-ABT	non-ABT	93.6416	91.3295	88.4393	74.5665
CLS00133	COG	purK	SP_0054	0.484963	non-ABT	non-ABT	99.449	98.8981	92.8375	82.6446
CLS00135	COG	purB	SP_0056	0.291936	non-ABT	non-ABT	99.7685	99.7685	98.6111	94.6759
CLS00136	Degradative	strH	SP_0057	4.53462	non-ABT	ABT	98.9329	93.3131	0	0
CLS00137	COG	frlR	SP_0058	0.432111	non-ABT	non-ABT	100	100	94.1176	0
CLS00138	COG	bgaC	SP_0060	0.649485	non-ABT	non-ABT	99.4958	97.9832	94.7899	0
CLS00139	COG	-	SP_0061	0.0505894	non-ABT	non-ABT	100	99.3671	97.4684	0
CLS00140	COG	-	SP_0062	0.0261986	non-ABT	non-ABT	99.6678	98.0066	97.6744	0
CLS00142	COG	-	SP_0064	0	non-ABT	non-ABT	88.189	88.189	91.791	0
CLS00143	COG	agaS	SP_0065	0.336664	non-ABT	non-ABT	99.4845	98.9691	96.134	0
CLS00144	COG	galM	SP_0066	0.89806	non-ABT	non-ABT	99.7101	94.2029	46.3768	0
CLS00145	COG	catE	SP_0073	0.433554	non-ABT	non-ABT	99.2958	96.4789	0	0
CLS00146	COG	csoR	-	0.406419	-	non-ABT	97.6471	0	0	0
CLS00147	COG	glpE	-	0.0538912	-	non-ABT	0	0	0	0
CLS00148	COG	-	SP_0075	0.587181	non-ABT	non-ABT	99.6063	95.6693	92.5197	0
CLS00149	COG	trkH	SP_0078	0.186994	non-ABT	non-ABT	99.5643	97.6035	80.8279	0
CLS00150	COG	trkA	SP_0079	0.706317	non-ABT	non-ABT	100	96.8326	93.2127	0
CLS00151	COG	-	SP_0081	0.234219	non-ABT	non-ABT	97.7654	50	50.2959	0
CLS00152	COG	-	-	0	-	non-ABT	0	0	0	0
CLS00153	COG	-	-	0.11433	-	non-ABT	97.7941	0	0	0
CLS00154	Adhesin	pavB	SP_0082	3.63681	ABT	ABT	39.4213	34.657	22.0245	0
CLS00155	COG	saeR	SP_0083	0.454486	non-ABT	non-ABT	99.1379	99.1379	98.7069	0
CLS00156	COG	saeS	SP_0084	2.75395	non-ABT	ABT	100	95.7143	95.7143	0
CLS00157	COG	rpsD	SP_0085	0.787059	non-ABT	non-ABT	100	99.5074	100	94.0887
CLS00158	COG	-	-	0.338212	-	non-ABT	84.8837	0	0	0
CLS00159	COG	-	SP_0090	0.314084	non-ABT	non-ABT	96.8652	95.6113	93.4169	0
CLS00160	COG	-	SP_0091	0.23147	non-ABT	non-ABT	100	99.3485	97.0684	0
CLS00161	COG	-	SP_0092	0.931981	non-ABT	non-ABT	100	99.5927	94.1296	0
CLS00162	COG	-	SP_0095	2.20871	non-ABT	non-ABT	99.3902	99.3902	98.7805	0
CLS00163	COG	-	SP_0096	0.148609	non-ABT	non-ABT	98.951	93.7063	90.2098	0
CLS00164	COG	-	-	0	-	non-ABT	0	0	0	0
CLS00166	COG	-	-	0.00670208	-	non-ABT	0	0	0	0
CLS00167	COG	-	-	0.103458	-	non-ABT	0	0	0	0
CLS00168	COG	-	SP_0097	2.23223	non-ABT	ABT	98.8701	94.6328	91.2429	0
CLS00169	COG	-	SP_0098	0.976948	non-ABT	non-ABT	99.67	93.7294	80.198	0
CLS00170	COG	-	SP_0099	0.263703	non-ABT	non-ABT	98.9848	96.9543	97.4619	0
CLS00171	COG	-	SP_0100	0.0256743	non-ABT	non-ABT	100	98.1481	99.0741	0
CLS00172	COG	cynX	SP_0101	0.319922	non-ABT	non-ABT	99.2268	98.9691	94.8454	0
CLS00173	COG	pgaC	SP_0102	0.557091	non-ABT	non-ABT	91.1688	90.4145	0	0
CLS00174	COG	capD	SP_0103	0.323587	non-ABT	non-ABT	99.6753	98.8636	97.7273	0
CLS00175	COG	-	SP_0104	0.7145	non-ABT	non-ABT	97.619	93.8095	91.9048	0
CLS00176	COG	sdaA	SP_0105	0.473047	non-ABT	non-ABT	99.3103	98.9655	98.9655	0
CLS00177	COG	sdhB	SP_0106	0.74455	non-ABT	non-ABT	100	100	99.5516	0
CLS00178	CellWall	sep	SP_0107	3.38491	ABT	ABT	83.0769	97.4359	84.058	0
CLS00179	COG	-	-	0.329433	-	non-ABT	96.5812	0	0	0
CLS00180	COG	-	-	0.113197	-	non-ABT	97.1074	0	0	0
CLS00181	COG	-	SP_0116	0.415996	non-ABT	non-ABT	95.6522	51.497	0	0
CLS00183	COG	trmU	SP_0118	0.944722	non-ABT	non-ABT	99.4638	99.4638	98.3914	89.008
CLS00184	COG	-	SP_0119	0.75284	non-ABT	non-ABT	96.0265	98.6755	60.989	0
CLS00185	COG	gidA	SP_0120	0.45083	non-ABT	non-ABT	99.0581	99.2151	99.529	82.7316
CLS00186	COG	-	SP_0121	0.2467	non-ABT	non-ABT	99.8211	99.6422	99.1055	89.6429
CLS00187	COG	-	SP_0122	0	non-ABT	non-ABT	98.7013	97.4026	96.1039	0
CLS00188	COG	-	-	0.0248997	-	non-ABT	0	0	0	0
CLS00189	COG	cibB	SP_0124	0.0407951	non-ABT	non-ABT	100	0	0	0
CLS00190	COG	cibA	SP_0125	0.670334	non-ABT	non-ABT	100	98.3607	91.8033	0
CLS00191	COG	ydiC	SP_0127	0.963166	non-ABT	non-ABT	89.8678	89.8678	89.4273	60.5263
CLS00192	COG	rimI	SP_0128	0.619998	non-ABT	non-ABT	94.4828	95.8621	93.1034	0
CLS00193	COG	gcp	SP_0129	0.041094	non-ABT	non-ABT	98.8095	97.9167	98.5119	82.1429
CLS00194	COG	epsG	SP_0135	0.500196	non-ABT	non-ABT	59.1584	0	0	0
CLS00195	COG	-	SP_0136	0.312719	non-ABT	non-ABT	66.5615	0	0	0
CLS00197	COG	-	SP_0138	0.630702	non-ABT	non-ABT	70.8543	0	0	0
CLS00198	COG	-	SP_0139	0.637547	non-ABT	non-ABT	98.8048	0	0	0
CLS00199	COG	ugd	SP_0140	0.966497	non-ABT	non-ABT	63.0769	0	0	0
CLS00200	COG	mutR	SP_0141	0.154334	non-ABT	non-ABT	91.1864	90.5085	90.5085	0
CLS00201	COG	-	-	0.631789	-	non-ABT	0	0	0	0
CLS00202	COG	-	SP_0144	0.22129	non-ABT	non-ABT	97.2851	76.5766	90.4977	0
CLS00203	COG	-	SP_0145	0	non-ABT	non-ABT	98.7745	96.5686	0	0
CLS00204	COG	ygaZ	SP_0146	0.155211	non-ABT	non-ABT	51.2931	91.7749	90.4762	0
CLS00205	COG	-	SP_0147	0.224665	non-ABT	non-ABT	0	97.1963	96.2617	0
CLS00206	COG	tcyA	SP_0148	1.76588	non-ABT	non-ABT	99.2754	98.5507	0	52.1583
CLS00207	COG	metQ	SP_0149	1.01809	non-ABT	non-ABT	99.6479	98.2394	97.5352	61.6197
CLS00208	COG	dapE	SP_0150	1.30019	non-ABT	non-ABT	99.3435	98.2495	97.3742	70.6783
CLS00209	COG	metN	SP_0151	0.36696	non-ABT	non-ABT	98.8669	98.3003	98.5836	72.5989
CLS00210	COG	metP	SP_0152	0.203176	non-ABT	non-ABT	98.6957	96.9565	96.5217	70.4348
CLS00211	COG	-	SP_0153	0.371419	non-ABT	non-ABT	99.4709	94.709	95.2381	0
CLS00212	COG	-	SP_0154	0.150505	non-ABT	non-ABT	99.5098	96.0784	95.5882	0
CLS00213	COG	ypdA	SP_0155	0.0816371	non-ABT	non-ABT	99.4643	97.3214	88.0357	0
CLS00214	COG	-	SP_0156	0	non-ABT	non-ABT	98.5981	97.8972	96.4953	0
CLS00215	COG	-	SP_0157	0.17981	non-ABT	non-ABT	91.7098	83.4197	80.3109	0
CLS00216	COG	nrdI	SP_0158	0.274599	non-ABT	non-ABT	99.359	98.7179	93.5897	0
CLS00217	COG	-	SP_0159	0.793478	non-ABT	non-ABT	99.7619	99.5238	0	61.8483
CLS00218	COG	-	SP_0160	0	non-ABT	non-ABT	98.6842	95.3947	86.1842	0
CLS00219	COG	-	SP_0161	0.0238775	non-ABT	non-ABT	98.6301	96.5753	95.2055	0
CLS00220	COG	hexB	SP_0173	1.13848	non-ABT	non-ABT	74.5763	98.9214	97.5347	70.2128
CLS00221	COG	ribH	SP_0175	0.593583	non-ABT	non-ABT	100	99.3548	0	0
CLS00223	COG	ribE	SP_0177	0	non-ABT	non-ABT	99.0521	98.5782	0	0
CLS00224	COG	ribD	SP_0178	0.472259	non-ABT	non-ABT	99.7268	99.4536	0	0
CLS00225	COG	ruvA	SP_0179	0.811392	non-ABT	non-ABT	98.9848	97.9695	98.9848	71.6418
CLS00226	COG	tag	SP_0180	0	non-ABT	non-ABT	97.3262	62.5668	89.3048	60.4278
CLS00227	COG	-	SP_0181	0.140284	non-ABT	non-ABT	98.6667	0	0	0
CLS00228	COG	-	SP_0182	0.340555	non-ABT	non-ABT	99.1254	98.2558	86.8805	0
CLS00229	COG	-	SP_0184	0.201517	non-ABT	non-ABT	99.5595	99.5595	96.0352	0
CLS00230	COG	corA	SP_0185	1.18526	non-ABT	non-ABT	100	100	99.6815	70.3822
CLS00231	COG	uvrA	SP_0186	0.533696	non-ABT	non-ABT	98.5325	97.2746	96.7505	82.914
CLS00232	COG	pepP	SP_0187	0.668136	non-ABT	non-ABT	99.1501	97.7337	98.5836	56.9014
CLS00233	COG	-	SP_0189	0.344306	non-ABT	non-ABT	100	100	100	79.5455
CLS00234	COG	-	SP_0191	3.6682	ABT	ABT	98.4127	96.8254	97.3545	0
CLS00235	COG	-	SP_0192	0.0889685	non-ABT	non-ABT	100	100	100	86.5169
CLS00236	COG	yrrK	SP_0193	0.098637	non-ABT	non-ABT	100	100	98.5612	83.4532
CLS00237	COG	-	SP_0194	0.146771	non-ABT	non-ABT	100	100	100	78.4314
CLS00238	COG	folC	SP_0197	0.224063	ABT	non-ABT	97.1154	94.4712	91.1058	0
CLS00239	COG	pccL	SP_0198	1.73545	non-ABT	ABT	80.791	0	68.8889	0
CLS00241	COG	-	-	0.190996	-	non-ABT	0	0	0	0
CLS00242	COG	-	SP_0201	0.255942	non-ABT	non-ABT	99.6094	95.3125	91.2109	0
CLS00243	COG	nrdD	SP_0202	0.228465	non-ABT	non-ABT	99.3216	97.1506	98.1004	82.2493
CLS00244	COG	-	SP_0203	0.00243304	non-ABT	non-ABT	0	0	0	0
CLS00245	COG	-	SP_0204	0.300321	non-ABT	non-ABT	97.619	68.4524	80.9524	57.2973
CLS00246	COG	nrdG	SP_0205	1.67408	non-ABT	non-ABT	99.4898	98.9796	98.9796	85.0746
CLS00247	COG	-	SP_0207	0.485653	non-ABT	non-ABT	99.0244	95.6098	92.3077	0
CLS00248	COG	rpsJ	SP_0208	0.219928	non-ABT	non-ABT	100	100	98.0392	95.098
CLS00249	COG	rplC	SP_0209	0.151119	non-ABT	non-ABT	100	99.5192	100	92.7885
CLS00250	COG	rplD	SP_0210	0.0328534	non-ABT	non-ABT	99.5169	96.6184	95.6522	89.372
CLS00251	COG	rplW	SP_0211	0.0895277	non-ABT	non-ABT	100	100	95.9184	84.8485
CLS00252	COG	rplB	SP_0212	0.384623	ABT	non-ABT	100	99.639	96.0289	92.1147
CLS00253	COG	rpsS	SP_0213	0	non-ABT	non-ABT	100	100	100	96.7742
CLS00254	COG	rplV	SP_0214	0	non-ABT	non-ABT	100	100	98.2456	87.7193
CLS00255	COG	rpsC	SP_0215	0.719961	non-ABT	non-ABT	100	100	98.1567	96.3134
CLS00256	COG	rplP	SP_0216	0.244882	non-ABT	non-ABT	100	100	100	96.3504
CLS00257	COG	rpmC	SP_0217	0.0220034	non-ABT	non-ABT	100	100	100	82.6087
CLS00258	COG	rpsQ	SP_0218	0.115719	non-ABT	non-ABT	100	100	100	93.0233
CLS00259	COG	rplN	SP_0219	0.0802292	non-ABT	non-ABT	100	100	99.1803	96.7213
CLS00260	COG	rplX	SP_0220	0.0100631	non-ABT	non-ABT	100	100	100	87.1287
CLS00261	COG	rplE	SP_0221	0.570556	non-ABT	non-ABT	100	100	99.4444	94.4444
CLS00262	COG	rpsN	SP_0222	0	ABT	non-ABT	100	100	0	0
CLS00263	COG	rpsH	SP_0224	0.460051	non-ABT	non-ABT	100	98.4848	99.2424	84.8485
CLS00264	COG	rplF	SP_0225	0.394507	non-ABT	non-ABT	99.4382	97.7528	98.3146	85.9551
CLS00265	COG	rplR	SP_0226	0	non-ABT	non-ABT	96.6942	97.5207	97.5207	94.2149
CLS00266	COG	rpsE	SP_0227	0.523746	non-ABT	non-ABT	100	99.3902	99.3902	93.2927
CLS00267	COG	rpmD	SP_0228	0.160936	non-ABT	non-ABT	100	100	100	91.6667
CLS00268	COG	rplO	SP_0229	0.0569393	non-ABT	non-ABT	100	99.3151	100	91.0959
CLS00269	COG	secY	SP_0230	0.112981	non-ABT	non-ABT	100	99.3119	97.2477	70.6422
CLS00270	COG	adk	SP_0231	0.0763255	non-ABT	non-ABT	100	99.5283	98.5849	80.6604
CLS00271	COG	infA	SP_0232	0.559552	non-ABT	non-ABT	100	100	100	93.0556
CLS00272	COG	rpsM	SP_0234	0.0756049	non-ABT	non-ABT	100	100	100	95.8678
CLS00273	COG	rpsK	SP_0235	0	non-ABT	non-ABT	100	100	100	96.8504
CLS00274	COG	rpoA	SP_0236	0.815567	non-ABT	non-ABT	100	100	100	86.2179
CLS00275	COG	rplQ	SP_0237	0	non-ABT	non-ABT	100	100	100	96.0938
CLS00276	COG	-	SP_0238	0	non-ABT	non-ABT	100	100	98.8636	84.0909
CLS00277	COG	-	SP_0239	0.691341	ABT	non-ABT	100	96.1798	98.6517	90.1124
CLS00278	COG	gpmB	SP_0240	0.566016	non-ABT	non-ABT	100	96.9565	95.6522	56.8465
CLS00279	COG	pitA	-	0.530464	-	non-ABT	97.3529	60.5072	0	0
CLS00280	COG	pitD	SP_0241	8.13142e-07	non-ABT	non-ABT	51.4423	0	0	0
CLS00281	COG	pitB	SP_0242	0	non-ABT	non-ABT	74.6556	71.6253	0	0
CLS00282	COG	pitC	SP_0243	0.123877	non-ABT	non-ABT	31.1881	56.6092	0	0
CLS00283	COG	-	-	0.049339	-	non-ABT	0	0	0	0
CLS00284	COG	pflE	SP_0245	0	non-ABT	non-ABT	100	0	0	78.2946
CLS00285	COG	-	SP_0246	0.297144	non-ABT	non-ABT	99.5968	0	0	67.7419
CLS00286	COG	sorC	SP_0247	0.588813	non-ABT	non-ABT	100	0	0	0
CLS00287	COG	chbA	SP_0248	0.52567	non-ABT	non-ABT	99.0566	0	0	0
CLS00288	COG	gmuB	SP_0249	0.0105942	non-ABT	non-ABT	100	0	0	0
CLS00289	COG	gmuC	SP_0250	0.217378	non-ABT	non-ABT	97.9167	0	0	0
CLS00290	COG	pflD	SP_0251	0.8017	ABT	non-ABT	100	0	0	84.0244
CLS00291	COG	fsaA	SP_0252	0.265897	non-ABT	non-ABT	99.5495	0	0	68.4685
CLS00292	COG	gldA	SP_0253	0.8139	non-ABT	non-ABT	100	0	0	75
CLS00293	COG	leuS	SP_0254	0.373551	non-ABT	non-ABT	98.5594	97.8391	97.3589	86.3145
CLS00294	COG	-	-	0	-	non-ABT	0	99.2857	0	0
CLS00295	COG	-	SP_0255	0.355652	non-ABT	non-ABT	95.671	99.5671	87.013	51.5152
CLS00296	COG	-	SP_0256	0.352901	non-ABT	non-ABT	94.2029	99.2754	90.5797	0
CLS00297	COG	ruvB	SP_0259	1.10555	non-ABT	non-ABT	97.2892	96.0843	95.1807	90.6627
CLS00298	COG	-	SP_0260	0.276544	non-ABT	non-ABT	80	74.7368	77.8947	49.1979
CLS00299	COG	uppS	SP_0261	0.342777	non-ABT	non-ABT	100	99.6032	99.2063	71.8254
CLS00300	COG	cdsA	SP_0262	0.300652	non-ABT	non-ABT	98.8764	99.2509	97.7528	58.9552
CLS00301	COG	rseP	SP_0263	0.157231	non-ABT	non-ABT	100	100	96.1814	63.0952
CLS00302	COG	proS	SP_0264	0.450399	non-ABT	non-ABT	99.6759	99.0276	98.5413	77.7958
CLS00303	COG	-	SP_0265	0.307934	non-ABT	non-ABT	99.7821	96.0784	96.0784	0
CLS00304	COG	glmS	SP_0266	0.0882038	non-ABT	non-ABT	98.3389	96.5116	96.5116	79.3388
CLS00305	COG	limB	SP_0267	0.780339	non-ABT	non-ABT	99.7135	95.1289	95.1289	0
CLS00306	Degradative	pulA	SP_0268	3.66049	non-ABT	ABT	97.5781	96.115	91.3713	0
CLS00307	COG	rpsL	SP_0271	0.158957	non-ABT	non-ABT	100	100	98.5401	92.7007
CLS00308	COG	rpsG	SP_0272	0.187643	non-ABT	non-ABT	100	100	100	93.5897
CLS00309	COG	fusA	SP_0273	0.696371	non-ABT	non-ABT	99.7114	99.7114	99.4228	93.9394
CLS00310	COG	polC	SP_0274	1.31842	non-ABT	non-ABT	99.6582	98.4279	98.2912	75.4949
CLS00311	COG	-	SP_0275	0.20157	non-ABT	non-ABT	97.7011	0	93.1034	0
CLS00312	COG	yafQ	SP_0276	0.301294	non-ABT	non-ABT	100	0	92.3913	0
CLS00314	COG	pepS	SP_0278	0.887866	non-ABT	non-ABT	98.7893	97.8208	98.5472	0
CLS00315	COG	-	SP_0279	0.150186	non-ABT	non-ABT	98.6842	93.4211	89.4737	0
CLS00316	COG	rsuB	SP_0280	0.789001	non-ABT	non-ABT	95	94.1667	91.6667	0
CLS00317	COG	pepC	SP_0281	0	non-ABT	non-ABT	99.3243	98.6486	97.973	80.8559
CLS00318	COG	manN	SP_0282	0.342575	non-ABT	non-ABT	100	100	76.8977	69.8052
CLS00319	COG	manM	SP_0283	0.0509803	non-ABT	non-ABT	100	100	78.8889	68.0147
CLS00320	COG	manL	SP_0284	0.817157	non-ABT	non-ABT	100	100	96.0486	82.8313
CLS00321	COG	adhP	SP_0285	2.63914	non-ABT	ABT	99.41	97.3451	97.9351	0
CLS00322	COG	-	SP_0286	0	non-ABT	non-ABT	99.6296	100	97.037	55.5556
CLS00323	COG	pbuO	SP_0287	0.162062	non-ABT	non-ABT	99.3658	97.8858	97.0402	71.4885
CLS00324	COG	-	SP_0288	0.234157	non-ABT	non-ABT	95.7447	92.3404	89.3617	0
CLS00325	COG	folP	SP_0289	0.797953	non-ABT	non-ABT	93.8272	90.184	91.7178	0
CLS00326	COG	folC	SP_0290	0.954437	non-ABT	non-ABT	98.8636	94.3182	91.8182	0
CLS00327	COG	folE	SP_0291	0	non-ABT	non-ABT	98.913	99.4565	98.3696	0
CLS00328	COG	sulD	SP_0292	0.301442	non-ABT	non-ABT	99.2593	93.7037	92.5926	0
CLS00329	COG	-	SP_0293	0.264204	non-ABT	non-ABT	100	97.1429	98.0952	0
CLS00330	COG	rplM	SP_0294	0.134722	non-ABT	non-ABT	100	100	100	93.9189
CLS00331	COG	rpsI	SP_0295	0.0586932	ABT	non-ABT	100	100	99.2308	95.3846
CLS00332	COG	-	SP_0296	0.252593	non-ABT	non-ABT	0	0	0	0
CLS00333	COG	-	SP_0311	0.194038	non-ABT	non-ABT	100	100	0	0
CLS00334	COG	xylS	SP_0312	0	non-ABT	non-ABT	99.5929	96.8792	0	44.709
CLS00335	COG	gpo	SP_0313	0.402811	non-ABT	non-ABT	100	91.1392	93.6709	0
CLS00336	Degradative	hylA	SP_0314	4.81512	non-ABT	ABT	99.344	0	0	0
CLS00337	COG	-	-	0.298347	-	non-ABT	94.3662	33.758	42.8571	50
CLS00338	COG	kgdA	SP_0317	0.403263	non-ABT	non-ABT	98.5646	0	0	0
CLS00339	COG	kdgK	SP_0318	0.534009	non-ABT	non-ABT	99.3994	0	0	0
CLS00340	COG	-	SP_0319	0.482072	non-ABT	non-ABT	99.5305	0	0	0
CLS00341	COG	gno	SP_0320	0.302268	non-ABT	non-ABT	99.631	0	0	0
CLS00342	COG	manX	SP_0321	0.395611	non-ABT	non-ABT	100	0	0	0
CLS00343	COG	ugl	SP_0322	0.735461	non-ABT	non-ABT	100	0	0	0
CLS00344	COG	agaV	SP_0323	0.345974	non-ABT	non-ABT	99.3865	0	0	0
CLS00345	COG	agaC	SP_0324	0.0235709	non-ABT	non-ABT	100	0	0	0
CLS00346	COG	agaD	SP_0325	2.62081	non-ABT	ABT	99.6324	0	0	0
CLS00347	COG	yajC1	SP_0326	0.790352	non-ABT	non-ABT	100	0	0	0
CLS00348	COG	-	SP_0329	0.362463	non-ABT	non-ABT	98.8942	0	0	0
CLS00349	COG	regR	SP_0330	0	ABT	non-ABT	99.6997	0	0	0
CLS00350	COG	-	SP_2241	0.032257	non-ABT	non-ABT	0	0	0	0
CLS00351	COG	-	SP_0331	0.481365	non-ABT	non-ABT	100	98.75	0	0
CLS00352	COG	-	SP_0333	0	non-ABT	non-ABT	98.4375	95.3125	96.875	0
CLS00353	COG	mraW	SP_0334	0.307688	non-ABT	non-ABT	97.7848	99.3671	98.7342	79.1139
CLS00354	COG	ftsL	SP_0335	0.0557757	non-ABT	non-ABT	99.0476	100	76.1905	0
CLS00355_a1	CellWall	pbp2x	-	2.36834	-	ABT	99.7333	90.2667	85.4667	55.3642
CLS00355_a2	CellWall	pbp2x	-	2.9694	-	ABT	90.1333	98.4	91.0667	54.6296
CLS00355_a3	CellWall	pbp2x	-	3.71617	-	ABT	96.4	90.5333	84.5333	55.3642
CLS00356	COG	mraY	SP_0337	0.24943	non-ABT	non-ABT	99.0798	93.865	94.7853	63.7681
CLS00357	COG	clpL	SP_0338	0.294568	non-ABT	non-ABT	98.4308	95.2924	98.0029	80.8782
CLS00358	COG	luxS	SP_0340	0.693298	non-ABT	non-ABT	100	98.75	99.375	83.75
CLS00359	COG	-	SP_0341	1.26105	non-ABT	non-ABT	99.5951	99.3927	98.1781	0
CLS00360	COG	dexB	SP_0342	0.195582	non-ABT	non-ABT	98.8785	95.8879	97.0093	72.2015
CLS00361	COG	-	-	1.19866	-	non-ABT	0	71	0	0
CLS00362	COG	wzg	SP_0346	3.14967	non-ABT	ABT	16.9421	0	0	0
CLS00363	COG	wzh	SP_0347	0.191698	non-ABT	non-ABT	41.9753	0	0	0
CLS00364	COG	wzd	SP_0348	0.451482	non-ABT	non-ABT	73.5931	0	0	0
CLS00365	COG	wze	SP_0349	0.836529	non-ABT	non-ABT	51.9651	0	0	0
CLS00366	COG	wchA	-	0.494269	-	non-ABT	0	0	0	0
CLS00367	COG	wchJ	-	0.315761	-	non-ABT	0	0	0	0
CLS00368	COG	wchK	-	0.137894	-	non-ABT	0	0	0	0
CLS00375	COG	wchX	-	0	-	non-ABT	0	0	0	0
CLS00376	COG	wchY	-	1.34059	-	non-ABT	0	0	0	0
CLS00377	COG	wchZ	-	2.07603	-	non-ABT	0	0	0	0
CLS00378	COG	wciA	-	0.297441	-	non-ABT	0	0	0	0
CLS00379	SBP	aliA	SP_0366	2.96521	non-ABT	ABT	45.5371	92.2844	90.3177	0
CLS00380	Degradative	eng	SP_0368	4.02344	ABT	ABT	98.6418	0	66.0353	0
CLS00381_a1	COG	pbp1a	-	1.62366	-	non-ABT	99.5828	81.7687	78.9905	55.2632
CLS00381_a2	COG	pbp1a	-	1.76056	-	non-ABT	87.8999	82.0408	85.8117	55.8201
CLS00381_a3	COG	pbp1a	-	1.28609	-	non-ABT	93.185	85.1701	82.2647	56.1427
CLS00382	COG	recU	SP_0370	0.586164	non-ABT	non-ABT	99.4949	97.4747	95.9596	69.3467
CLS00383	COG	ypsA	SP_0371	0.385393	non-ABT	non-ABT	100	98.2857	82.8571	0
CLS00384	COG	gpsB	SP_0372	0.194379	non-ABT	non-ABT	95.5752	81.1966	79.4872	0
CLS00385	COG	rlmL	SP_0373	0	non-ABT	non-ABT	99.4805	98.961	99.2208	69.0909
CLS00386	COG	-	SP_0374	3.96984	ABT	ABT	98.7069	94.6581	75.6757	37.613
CLS00387	COG	gnd	SP_0375	0.490573	non-ABT	non-ABT	98.5447	98.3368	98.3368	0
CLS00388	COG	ritR	SP_0376	0.50185	non-ABT	non-ABT	99.5633	96.5066	91.7031	0
CLS00389	COG	cbpCJ	SP_0377	3.46123	ABT	ABT	82.4561	50.1511	79.2398	0
CLS00390	COG	-	SP_0379	0.0353852	non-ABT	non-ABT	0	97.561	0	0
CLS00391	COG	-	SP_0380	0	non-ABT	non-ABT	0	0	0	0
CLS00392	COG	mvaK1	SP_0381	0.3953	non-ABT	non-ABT	98.2877	97.9452	95.2055	0
CLS00393	COG	mvaD	SP_0382	0.23652	non-ABT	non-ABT	100	96.8454	94.3218	66.055
CLS00394	COG	mvaK2	SP_0383	0.514868	non-ABT	non-ABT	97.6119	90.4478	91.0448	0
CLS00395	COG	fni	SP_0384	1.10215	non-ABT	non-ABT	99.1071	95.2381	94.0476	69.0476
CLS00396	COG	-	SP_0385	0.0681117	non-ABT	non-ABT	99.569	97.8448	98.2759	0
CLS00397	COG	vraS	SP_0386	0.138431	non-ABT	non-ABT	98.7915	96.0725	94.8795	47.2141
CLS00398	COG	vraR	SP_0387	0.249621	non-ABT	non-ABT	99.5238	96.1905	95.7143	73.2394
CLS00400	COG	-	SP_0389	0.376046	non-ABT	non-ABT	79.7468	0	0	0
CLS00401	COG	cbpG	SP_0390	0	ABT	non-ABT	54.6667	43.2127	0	0
CLS00402	COG	tig	SP_0400	0.202848	non-ABT	non-ABT	98.829	97.6581	97.6581	74.4731
CLS00403	COG	recD	SP_0401	0.0990505	non-ABT	non-ABT	98.4772	97.9695	96.9543	64.899
CLS00404	COG	spi	SP_0402	0.585336	non-ABT	non-ABT	99.0196	99.5098	99.0196	54.5894
CLS00405	COG	rnhC	SP_0403	0.455002	non-ABT	non-ABT	96.587	95.5631	95.2218	59.4771
CLS00406	COG	-	SP_0404	0.244725	non-ABT	non-ABT	100	99	99	0
CLS00407	COG	cvpA	SP_0405	0	non-ABT	non-ABT	100	97.2527	95.0549	0
CLS00408	COG	mutS2	SP_0406	0	non-ABT	non-ABT	98.4576	98.072	97.8149	66.7095
CLS00419	COG	-	SP_0408	0.187509	non-ABT	non-ABT	99.0909	98.4091	94.7727	67.1806
CLS00420	COG	-	SP_0409	0.131816	non-ABT	non-ABT	100	94.5055	93.4066	78.6885
CLS00421	COG	shetA	SP_0410	0.0734783	non-ABT	non-ABT	99.3311	94.3144	90.9699	0
CLS00422	COG	serS	SP_0411	0.752795	non-ABT	non-ABT	99.7642	96.6981	96.934	82.8638
CLS00423	COG	-	SP_0412	0.0335286	non-ABT	non-ABT	100	98.374	97.561	62.9032
CLS00424	COG	lysC	SP_0413	0.597476	non-ABT	non-ABT	99.7797	98.6784	96.9163	75.5507
CLS00425	COG	fabM	SP_0415	0.505565	non-ABT	non-ABT	100	99.2337	96.9349	66.1597
CLS00426	COG	-	SP_0416	0	non-ABT	non-ABT	80.5556	97.9167	91.6667	59.7222
CLS00427	COG	fabH	SP_0417	0.267082	non-ABT	non-ABT	100	97.2222	96.6049	71.6923
CLS00428	COG	acpP	SP_0418	0.239494	non-ABT	non-ABT	100	97.2973	97.2973	81.0811
CLS00429	COG	fabK	SP_0419	0.724034	non-ABT	non-ABT	99.6914	98.4568	97.5309	79.321
CLS00430	COG	fabD	SP_0420	0.30541	non-ABT	non-ABT	100	98.0392	92.5081	71.5686
CLS00431	COG	fabG	SP_0421	0.348269	non-ABT	non-ABT	98.7654	99.5885	94.2387	74.1803
CLS00432	COG	fabF	SP_0422	0.032679	non-ABT	non-ABT	100	100	97.5669	74.9392
CLS00433	COG	fabE	SP_0423	0	non-ABT	non-ABT	99.3789	99.3789	91.3043	65.8537
CLS00434	COG	fabZ	SP_0424	0.679029	non-ABT	non-ABT	99.2857	100	98.5714	93.5714
CLS00435	COG	accC	SP_0425	0.728728	non-ABT	non-ABT	99.7802	98.4615	98.4615	81.3596
CLS00436	COG	accD	SP_0426	0.980198	non-ABT	non-ABT	100	98.9583	98.6111	77.8547
CLS00437	COG	accA	SP_0427	0.660167	non-ABT	non-ABT	99.6078	98.8235	96.4706	75.7812
CLS00438	COG	-	SP_0429	0.237326	non-ABT	non-ABT	95.082	0	0	0
CLS00439	COG	-	SP_0431	0.218042	non-ABT	non-ABT	0	0	27.0492	0
CLS00440	COG	nusB	SP_0433	0.120916	non-ABT	non-ABT	100	85.8156	87.8571	0
CLS00441	COG	-	SP_0434	0	non-ABT	non-ABT	99.2248	89.9225	92.2481	61.0687
CLS00442	COG	efp	SP_0435	0.116596	non-ABT	non-ABT	100	98.9247	98.9247	89.2473
CLS00443	COG	gatB	SP_0436	0.862737	non-ABT	non-ABT	99.5833	98.5417	98.3368	79.1667
CLS00444	COG	gatA	SP_0437	0.317467	non-ABT	non-ABT	99.1803	97.541	97.9508	79.5082
CLS00445	COG	gatC	SP_0438	0.000974301	non-ABT	non-ABT	98	98	98	0
CLS00446	COG	prfC	SP_0439	0	non-ABT	non-ABT	99.4163	98.4436	98.8327	91.6342
CLS00447	COG	-	SP_0440	0.733951	non-ABT	non-ABT	35.6322	0	0	0
CLS00448	COG	rpmB	SP_0441	0.0969696	non-ABT	non-ABT	100	100	100	93.5484
CLS00449	COG	-	SP_0442	0.516989	non-ABT	non-ABT	100	100	99.1736	81.9672
CLS00450	COG	-	SP_0443	1.06897	non-ABT	non-ABT	99.6396	96.5766	97.4775	78.018
CLS00451	COG	ilvB	SP_0445	0.454418	non-ABT	non-ABT	99.6466	98.0565	99.1166	71.2522
CLS00452	COG	ilvH	SP_0446	0.475824	non-ABT	non-ABT	100	100	99.3671	81.875
CLS00453	COG	ilvC	SP_0447	0.290432	non-ABT	non-ABT	100	99.7059	99.7059	81.7647
CLS00454	COG	-	SP_0448	1.92176	non-ABT	non-ABT	97.4359	0	0	0
CLS00455	COG	-	SP_0449	0.158165	non-ABT	non-ABT	99.1525	95.7627	0	0
CLS00456	COG	ilvA	SP_0450	0.215377	non-ABT	non-ABT	99.7596	99.0385	99.5192	78.3654
CLS00457	COG	-	SP_0451	0.283493	non-ABT	non-ABT	100	98.5915	98.5915	0
CLS00458	COG	glnQ2	SP_0452	0.122925	non-ABT	non-ABT	100	99.187	98.7805	83.3333
CLS00459	COG	-	SP_0453	1.0834	non-ABT	non-ABT	99.6161	97.5048	96.1612	71.4559
CLS00460	COG	-	SP_0454	0.707543	ABT	non-ABT	96.9793	94.4356	94.1176	0
CLS00461	COG	-	SP_2074	0	non-ABT	non-ABT	94.1176	0	0	0
CLS00462	COG	bacA	SP_0457	0.146192	non-ABT	non-ABT	99.6441	98.5765	97.8648	65.493
CLS00463	COG	dinB	SP_0458	0	non-ABT	non-ABT	98.8669	97.1671	97.4504	66.2162
CLS00464	COG	pflB	SP_0459	0	non-ABT	non-ABT	99.8708	99.2248	98.4496	88.417
CLS00465	COG	-	-	0.151692	-	non-ABT	68.5714	0	0	0
CLS00466	COG	-	SP_0470	0.113747	non-ABT	non-ABT	0	0	0	0
CLS00467	COG	-	SP_0471	0	non-ABT	non-ABT	98.9362	0	0	0
CLS00469	COG	trkG2	SP_0479	0	non-ABT	non-ABT	99.7912	58.6639	96.8685	69.1023
CLS00470	COG	trkA2	SP_0480	0.550742	non-ABT	non-ABT	99.3318	94.8775	97.5501	69.4013
CLS00471	COG	-	SP_0481	0.724128	non-ABT	non-ABT	96.9072	94.5017	95.189	80.4124
CLS00472	COG	-	SP_0482	0.0804562	non-ABT	non-ABT	98.9011	96.1538	92.3077	0
CLS00473	COG	-	-	0.374286	-	non-ABT	97.1429	52.9412	55.2941	0
CLS00474	COG	cbiO	SP_0483	0.345284	non-ABT	non-ABT	96.7857	96.25	95.3571	65.6637
CLS00475	COG	cbiQ	SP_0484	0.199645	non-ABT	non-ABT	98.5507	97.1014	96.3768	64.9819
CLS00476	COG	cspR	SP_0486	0.540225	non-ABT	non-ABT	98.2036	97.006	97.6048	70.8791
CLS00477	COG	ribU	SP_0488	0.900706	non-ABT	non-ABT	96.875	96.3542	95.3125	0
CLS00478	COG	-	SP_0489	0.189825	non-ABT	non-ABT	98.1481	94.4444	94.4444	0
CLS00479	COG	-	SP_0490	0.450834	non-ABT	non-ABT	97.6744	0	82.0144	0
CLS00480	COG	-	SP_0492	0.315855	non-ABT	non-ABT	99.3289	66.443	83.6478	0
CLS00481	COG	rpoE	SP_0493	0.139085	non-ABT	non-ABT	97.5	96	93.5	69.6517
CLS00482	COG	pyrG	SP_0494	0.452738	non-ABT	non-ABT	99.6262	99.4393	98.1308	89.7579
CLS00483	COG	-	SP_0496	0.167176	non-ABT	non-ABT	64.825	98.1584	83.6096	0
CLS00484	COG	-	SP_0497	0.207153	non-ABT	non-ABT	0	0	0	0
CLS00485	Degradative	-	SP_0498	3.70028	ABT	ABT	99.3972	91.4423	87.251	0
CLS00486	COG	pgk	SP_0499	0.345176	non-ABT	non-ABT	99.7487	100	100	92.2111
CLS00487	COG	-	SP_0500	0.0380001	non-ABT	non-ABT	100	97.1429	97.1429	71.4286
CLS00488	COG	glnR	SP_0501	0	non-ABT	non-ABT	100	100	99.1525	64.5161
CLS00489	COG	glnA	SP_0502	1.20263	non-ABT	non-ABT	100	99.1071	97.9911	89.0625
CLS00490	COG	spnIVRhsdS	SP_0508	0.773025	non-ABT	non-ABT	23.855	35.3591	0	0
CLS00491	COG	spnIVRhsdM	SP_0509	0.901718	ABT	non-ABT	99.384	99.5893	0	0
CLS00492	COG	spnIVRhsdR	SP_0510	0	non-ABT	non-ABT	99.7426	98.5843	0	0
CLS00493	COG	-	SP_0514	0.809575	non-ABT	non-ABT	85.8824	77.6471	64.6067	0
CLS00494	COG	hrcA	SP_0515	0.0918608	non-ABT	non-ABT	96.0563	94.3662	95.493	61.4085
CLS00495	COG	grpE	SP_0516	0	non-ABT	non-ABT	99.4253	97.7011	97.7011	73.4807
CLS00496	COG	dnaK	SP_0517	0.282493	non-ABT	non-ABT	100	99.5058	99.5058	93.7908
CLS00497	COG	-	-	0.333701	-	non-ABT	90.678	62.0438	0	0
CLS00498	COG	dnaJ	SP_0519	0.754812	ABT	non-ABT	98.4127	96.3061	96.8338	78.3641
CLS00499	COG	-	SP_0520	0.333158	non-ABT	non-ABT	98.9474	95.7895	95.7895	0
CLS00500	COG	hit	SP_0521	0	non-ABT	non-ABT	100	97.0588	96.3235	63.3094
CLS00501	COG	ecsA	SP_0522	0	non-ABT	non-ABT	98.7654	95.8848	96.7078	72.0165
CLS00502	COG	ecsB	SP_0523	0.112312	non-ABT	non-ABT	99.7135	97.1347	96.8481	0
CLS00503	COG	blpT	SP_0524	0.0253582	non-ABT	non-ABT	99.0826	80.1724	83.6207	0
CLS00504	COG	blpS	SP_0525	0	non-ABT	non-ABT	96.4286	94.6429	93.75	0
CLS00505	COG	blpR	SP_0526	0	non-ABT	non-ABT	87.7551	89.7959	88.1633	46.6135
CLS00506	COG	blpH	SP_0527	0.223557	non-ABT	non-ABT	84.7534	91.2556	84.8889	0
CLS00507	COG	blpB	SP_0529	2.87246	ABT	ABT	72.1854	97.7925	0	0
CLS00508	COG	blpA1	-	0.173031	-	non-ABT	98.7061	75.0349	0	70.4587
CLS00509	COG	blpI	SP_0531	1.06668	non-ABT	non-ABT	0	0	0	0
CLS00510	COG	blpJ	SP_0532	0.0109679	non-ABT	non-ABT	0	0	0	0
CLS00511	COG	blpK	SP_0540	0.106177	non-ABT	non-ABT	0	0	0	0
CLS00512	COG	-	SP_0535	0.372204	non-ABT	non-ABT	0	0	79.6296	0
CLS00513	COG	blpL	SP_0536	0.220855	non-ABT	non-ABT	0	0	72.7941	0
CLS00514	COG	blpX	SP_0544	0.202907	non-ABT	non-ABT	0	83.4646	93.7008	0
CLS00515	COG	blpY	SP_0545	0.185444	non-ABT	non-ABT	94.3231	92.5764	97.8166	0
CLS00516	COG	pncP	SP_0547	0.0276652	non-ABT	non-ABT	98.5222	0	66.5025	0
CLS00517	COG	cotS	SP_0549	0	non-ABT	non-ABT	100	99.2424	98.8636	58.7121
CLS00518	COG	trmB	SP_0550	0.39968	non-ABT	non-ABT	100	99.0521	99.0521	75.8294
CLS00519	COG	rimP	SP_0552	0.25774	non-ABT	non-ABT	98.7421	99.3711	97.4843	68.0982
CLS00520	COG	nusA	SP_0553	0	non-ABT	non-ABT	98.1481	98.9418	97.0899	77.33
CLS00521	COG	ylxR	SP_0554	0.0365874	non-ABT	non-ABT	100	100	100	85.7143
CLS00522	COG	-	SP_0555	0	non-ABT	non-ABT	98.9899	100	98.9899	71
CLS00523	COG	infB	SP_0556	0	non-ABT	non-ABT	99.6774	98.0707	97.3205	76.246
CLS00524	COG	rbfA	SP_0557	0.0849531	non-ABT	non-ABT	98.2759	97.4138	99.1379	83.7607
CLS00525	COG	-	SP_0558	1.25407	non-ABT	non-ABT	97.6834	19.305	0	0
CLS00526	COG	-	SP_0559	0.366116	non-ABT	non-ABT	85	0	78.3333	0
CLS00527	COG	-	SP_0561	0.361438	non-ABT	non-ABT	95.0617	93.8272	93.8272	0
CLS00528	COG	-	SP_0562	0.660632	non-ABT	non-ABT	97.7477	96.3964	96.3964	68.1319
CLS00529	COG	-	SP_0563	0.150099	non-ABT	non-ABT	100	100	100	73.8095
CLS00530	COG	-	SP_0564	0.00215748	ABT	non-ABT	98.4733	98.4733	97.7099	0
CLS00531	COG	-	SP_0565	0	non-ABT	non-ABT	99.3289	47.9167	65.1042	0
CLS00532	COG	-	SP_0566	0.222494	non-ABT	non-ABT	98.3784	93.0108	87.0968	0
CLS00533	COG	-	-	1.37446	-	non-ABT	99.375	0	0	0
CLS00534	COG	valS	SP_0568	1.58699	non-ABT	non-ABT	98.641	96.829	96.6025	89.9207
CLS00535	COG	-	-	0	-	non-ABT	98.0392	0	0	0
CLS00537	COG	-	SP_0575	0	non-ABT	non-ABT	46.5753	45.5232	47.4215	0
CLS00538	COG	licT	SP_0576	0.295791	non-ABT	non-ABT	98.9247	99.6416	0	0
CLS00539	COG	bglF	SP_0577	0	non-ABT	non-ABT	99.3464	98.6928	0	0
CLS00540	COG	bglA2	SP_0578	1.12868	non-ABT	non-ABT	99.7877	98.5138	0	0
CLS00542	COG	paiA	SP_0580	0.35479	non-ABT	non-ABT	100	95.858	70.4142	63.0058
CLS00543	COG	pheT	SP_0581	0.646216	non-ABT	non-ABT	99.875	97.5031	97.0037	74.0325
CLS00544	COG	-	SP_0582	0.107796	non-ABT	non-ABT	99.3994	94.5946	0	0
CLS00545	COG	tnp	SP_0915	0.0424501	non-ABT	non-ABT	62.4161	59.1716	0	0
CLS00546	COG	metE	SP_0585	1.34951	non-ABT	non-ABT	99.1989	98.6649	98.2644	46.4935
CLS00547	COG	metF	SP_0586	0.74989	non-ABT	non-ABT	98.2639	98.9583	98.9583	0
CLS00548	COG	pnpA	SP_0588	0.417388	non-ABT	non-ABT	94.7097	94.0645	93.5484	79.3059
CLS00549	COG	cysE	SP_0589	0.111741	non-ABT	non-ABT	98.0488	98.0488	97.0732	81.9512
CLS00550	COG	-	SP_0590	0	non-ABT	non-ABT	98.6395	96.5986	94.5578	0
CLS00551	COG	cysS	SP_0591	1.04873	non-ABT	non-ABT	99.7763	97.5391	96.1969	77.4049
CLS00552	COG	mrnC	SP_0592	0.0741703	non-ABT	non-ABT	99.2188	95.3125	97.6562	69.0647
CLS00553	COG	lrp	SP_0593	0.547598	non-ABT	non-ABT	99.3197	95.5782	92.517	0
CLS00554	COG	-	SP_0596	0.248155	non-ABT	non-ABT	73.3668	0	0	0
CLS00555	COG	vexp1	SP_0599	0.890958	non-ABT	non-ABT	99.7647	95.0588	95.2941	0
CLS00556	COG	vexp2	SP_0600	0.0239674	non-ABT	non-ABT	98.6047	96.7442	95.814	0
CLS00557	COG	vexp3	SP_0601	0.539171	non-ABT	non-ABT	100	99.1285	98.4749	0
CLS00558	COG	vncR	SP_0603	0.0955394	non-ABT	non-ABT	100	97.2477	97.7064	0
CLS00559	COG	vncS	SP_0604	0.239267	non-ABT	non-ABT	99.5475	95.2489	93.4389	0
CLS00560	COG	fba	SP_0605	0.530837	non-ABT	non-ABT	100	99.6587	96.9283	91.4676
CLS00562	COG	-	SP_0606	0	non-ABT	non-ABT	98.2323	97.9798	0	0
CLS00564	COG	-	SP_0607	0.186948	non-ABT	non-ABT	99.5434	96.347	97.2603	72.1461
CLS00565	COG	-	SP_0608	0.0591223	non-ABT	non-ABT	98.6667	0	61.2	58.1197
CLS00566	COG	peb1A	SP_0609	0.207504	ABT	non-ABT	98.0315	0	93.1818	0
CLS00567	COG	-	SP_0610	0.29209	non-ABT	non-ABT	49.3392	65.625	86.9048	70
CLS00568	COG	recJ	SP_0611	0.205844	non-ABT	non-ABT	98.6559	96.2366	90.9898	63.172
CLS00569	COG	rnjB	SP_0613	1.19093	ABT	non-ABT	100	97.6492	97.2875	71.4801
CLS00570	COG	estA	SP_0614	0.270056	non-ABT	non-ABT	99.6139	97.2973	94.5946	58.6466
CLS00571	COG	murM	SP_0615	0	non-ABT	non-ABT	99.7537	93.1034	88.4236	53.4483
CLS00572	COG	murN	SP_0616	0.444618	non-ABT	non-ABT	100	97.3171	98.2927	60.4878
CLS00573	COG	-	SP_0617	0.391401	non-ABT	non-ABT	88.8412	54.9356	94.4206	0
CLS00574	COG	uvrC	SP_0618	0.0453631	non-ABT	non-ABT	97.7236	97.0732	92.6677	74.3089
CLS00575	COG	-	SP_0619	0.643303	non-ABT	non-ABT	95.6679	94.9458	93.5018	0
CLS00576	COG	-	-	0.101856	-	non-ABT	0	0	0	0
CLS00577	COG	tcyJ	SP_0620	0.755033	non-ABT	non-ABT	98.4962	97.3684	97.7444	0
CLS00578	COG	nrd	SP_0622	0.183341	non-ABT	non-ABT	99.005	99.005	99.005	71.6418
CLS00579	COG	pepV	SP_0623	0.37006	non-ABT	non-ABT	98.7124	98.0687	97.4249	70.913
CLS00581	COG	-	SP_0625	0	non-ABT	non-ABT	98	0	0	0
CLS00582	COG	brnQ	SP_0626	0.186594	non-ABT	non-ABT	98.4305	97.0852	97.0852	0
CLS00583	COG	-	SP_0627	0.734211	non-ABT	non-ABT	95.6522	94.4928	95.942	0
CLS00584	CellWall	dacB	SP_0629	3.80798	non-ABT	ABT	86.9748	86.9748	83.6134	0
CLS00585	COG	rplK	SP_0630	0.120286	non-ABT	non-ABT	100	99.2908	99.2908	94.3262
CLS00586	COG	rplA	SP_0631	0.495944	non-ABT	non-ABT	99.5633	99.5633	99.5633	91.7031
CLS00587	COG	secB	SP_0633	0	non-ABT	non-ABT	99.1667	0	0	0
CLS00588	COG	metN2	SP_0636	0.321084	non-ABT	non-ABT	98.7879	97.8788	97.8788	0
CLS00589	COG	-	SP_0637	0.0949084	non-ABT	non-ABT	100	97.4265	97.4265	0
CLS00590	COG	-	SP_0638	0.372401	non-ABT	non-ABT	100	95.7854	95.7854	0
CLS00591	COG	-	SP_0640	0.0552588	non-ABT	non-ABT	83.9506	0	0	0
CLS00592	Degradative	prtA	SP_0641	5.28025	ABT	ABT	96.9231	88.4633	89.1583	0
CLS00593	COG	gatA	SP_1198	0.612262	non-ABT	non-ABT	100	97.4684	95.5696	0
CLS00594	COG	gatB	SP_1197	0.0393786	non-ABT	non-ABT	100	98.0198	98.0198	0
CLS00595	COG	gatC	SP_0647	0.1602	non-ABT	non-ABT	99.389	99.5927	94.9084	0
CLS00596	Degradative	bgaA	SP_0648	4.51049	ABT	ABT	97.5817	95.5665	47.0928	0
CLS00597	COG	-	-	0	-	non-ABT	44.3925	58.7349	0	0
CLS00598	COG	-	SP_0649	0.12727	non-ABT	non-ABT	93.8272	0	0	0
CLS00599	COG	-	SP_0650	0.00596171	non-ABT	non-ABT	98.3193	0	89.916	0
CLS00600	COG	-	SP_0651	0	non-ABT	non-ABT	85.2071	74.8858	51.5723	46.1538
CLS00601	COG	-	-	0.127918	-	non-ABT	97.973	97.2973	0	0
CLS00602	COG	-	SP_0652	0	non-ABT	non-ABT	100	95.6757	84.8649	59.3583
CLS00603	COG	-	SP_0653	0.0234375	non-ABT	non-ABT	97.619	94.0476	96.4286	0
CLS00604	COG	nhaK	SP_0655	0.234445	non-ABT	non-ABT	99.5614	98.0994	94.0058	0
CLS00605	COG	-	SP_0657	0.121946	non-ABT	non-ABT	96.9072	95.189	64.9485	0
CLS00606	COG	ccdA1	SP_0658	0.366867	non-ABT	non-ABT	99.5763	97.4576	86.8644	0
CLS00607	COG	etrx1	SP_0659	3.0076	non-ABT	ABT	96.3918	92.268	78.3505	0
CLS00608	COG	msrAB2	SP_0660	2.29518	non-ABT	ABT	99.7297	97.2973	94.3243	0
CLS00609	COG	yesN	SP_0661	0.437908	non-ABT	non-ABT	97.6096	96.4143	94.8207	0
CLS00610	COG	yehU	SP_0662	0.255357	non-ABT	non-ABT	100	93.7833	93.6057	0
CLS00611	COG	ywlG	SP_0663	0.204475	non-ABT	non-ABT	95.3608	86.5979	85.567	64.9485
CLS00613	COG	pabB	SP_0665	0.323095	non-ABT	non-ABT	90.925	90.925	90.925	0
CLS00615	Adhesin	cbpL	SP_0667	2.76336	ABT	ABT	36.2667	25.1185	32.491	0
CLS00616	COG	gki	SP_0668	0.255203	non-ABT	non-ABT	96.9231	96.6154	96.3077	59.2705
CLS00617	COG	thyA	SP_0669	0.0309276	non-ABT	non-ABT	100	98.2079	96.7742	84.5878
CLS00618	COG	miaA	SP_0671	0.359227	non-ABT	non-ABT	96.3576	93.3775	92.3841	60.596
CLS00619	COG	hflX	SP_0672	0	non-ABT	non-ABT	99.7573	97.0874	96.3592	68.6747
CLS00620	COG	-	SP_0673	0.504745	non-ABT	non-ABT	98.5507	91.3043	91.7874	0
CLS00621	COG	rnz	SP_0674	0.341434	non-ABT	non-ABT	100	98.3819	97.7346	77.3463
CLS00622	COG	-	SP_0675	0.844033	non-ABT	non-ABT	100	92.8287	94.4223	59.4488
CLS00623	COG	cpsY	SP_0676	0.547064	non-ABT	non-ABT	100	93.7888	93.4783	78.882
CLS00624	COG	yqgQ	SP_0677	0	non-ABT	non-ABT	100	100	84.2697	0
CLS00625	COG	yibN	SP_0678	0.276546	non-ABT	non-ABT	100	100	97.6378	0
CLS00626	COG	rsuA	SP_0680	0.358966	non-ABT	non-ABT	99.1701	96.2656	84.2324	51.6529
CLS00627	COG	typA	SP_0681	0.250574	non-ABT	non-ABT	98.7097	98.7097	98.3871	90.8213
CLS00628	COG	-	SP_0682	0.154906	non-ABT	non-ABT	100	96.4286	80.9524	0
CLS00629	COG	-	-	0.117364	-	non-ABT	86.087	91.9192	0	0
CLS00630	COG	-	SP_0686	0.107404	non-ABT	non-ABT	99.4056	93.4621	93.9079	0
CLS00631	COG	-	SP_0687	0.384341	non-ABT	non-ABT	99.061	98.5915	99.061	0
CLS00632	COG	murD	SP_0688	1.11538	ABT	non-ABT	99.1111	96.2222	96.8889	75.388
CLS00633	COG	murG	SP_0689	0.392847	non-ABT	non-ABT	98.8636	96.0227	96.0227	63.5359
CLS00634	COG	ftsQ	SP_0690	1.82276	non-ABT	non-ABT	94.5813	87.4384	89.1626	0
CLS00635	COG	-	-	0.0347975	-	non-ABT	0	0	0	0
CLS00636	COG	-	SP_0694	0.0681534	non-ABT	non-ABT	78.806	0	0	0
CLS00637	COG	-	SP_0696	0.0217199	non-ABT	non-ABT	97.6261	0	0	0
CLS00638	COG	livG	SP_0697	0	non-ABT	non-ABT	73.8832	0	59.1065	67.2297
CLS00639	COG	pyrF	SP_0701	0.143175	non-ABT	non-ABT	99.5708	97.4249	96.1373	80.6867
CLS00640	COG	pyrE	SP_0702	0.709814	non-ABT	non-ABT	98.5714	98.0952	98.0952	82.8571
CLS00641	COG	-	SP_0703	0.25998	non-ABT	non-ABT	83.5821	0	78.3582	0
CLS00642	COG	-	SP_0704	0	non-ABT	non-ABT	98.8189	0	96.8504	0
CLS00643	COG	-	SP_0705	0.151971	non-ABT	non-ABT	98.8	0	97.6	0
CLS00645	COG	ccmA	SP_0707	0	non-ABT	non-ABT	99.5349	0	98.6047	0
CLS00646	COG	fliY	-	0.162573	-	non-ABT	100	0	62.5	0
CLS00647	COG	-	SP_0709	0.518911	non-ABT	non-ABT	65.4762	0	65.873	0
CLS00648	COG	tcyB	SP_0710	0	non-ABT	non-ABT	98.2222	0	96.8889	0
CLS00649	COG	-	SP_0711	0.113803	non-ABT	non-ABT	99.5575	0	97.7876	0
CLS00650	COG	-	SP_0712	0.414457	non-ABT	non-ABT	0	0	0	0
CLS00651	COG	lysS	SP_0713	0.528768	non-ABT	non-ABT	99.7984	98.7903	98.5887	87.9032
CLS00652	COG	lctO	SP_0715	0.463989	non-ABT	non-ABT	100	99.4709	78.836	0
CLS00653	COG	-	SP_0716	0.187733	non-ABT	non-ABT	99.5495	93.6937	0	0
CLS00654	COG	thiM2	SP_0717	0.63162	non-ABT	non-ABT	99.6154	98.4615	0	0
CLS00655	COG	thiE2	SP_0718	0.279239	non-ABT	non-ABT	99.5215	94.7368	0	0
CLS00656	COG	ykoE	SP_0719	0.00334216	non-ABT	non-ABT	99.4624	99.4624	0	0
CLS00657	COG	-	SP_0720	0	non-ABT	non-ABT	97.6139	95.4447	0	0
CLS00658	COG	cbiQ	SP_0721	0.107711	non-ABT	non-ABT	100	98.1481	0	0
CLS00659	COG	tenA	SP_0722	0.440482	non-ABT	non-ABT	99.5652	96.9565	0	0
CLS00660	COG	thiW	SP_0723	0.259765	non-ABT	non-ABT	97.7011	97.1264	0	0
CLS00661	COG	thiM1	SP_0724	0.166266	non-ABT	non-ABT	96.2547	94.382	0	0
CLS00662	COG	thiE1	SP_0725	0.0399068	non-ABT	non-ABT	98.0952	98.0952	0	0
CLS00663	COG	thiD	SP_0726	0.68145	non-ABT	non-ABT	99.6198	97.7186	0	0
CLS00664	COG	copY	SP_0727	0.175034	non-ABT	non-ABT	98.4733	93.1298	93.8931	0
CLS00665	COG	cupA	SP_0728	0.423712	non-ABT	non-ABT	100	94.3089	95.935	0
CLS00666	COG	copA	SP_0729	0.178873	non-ABT	non-ABT	98.6667	94.1333	94.2667	0
CLS00667	COG	spxB	SP_0730	0.916752	non-ABT	non-ABT	99.6616	97.6311	97.9695	0
CLS00668	COG	-	SP_0731	0.187275	non-ABT	non-ABT	100	86.9565	83.4783	0
CLS00670	COG	bglA3	SP_0735	0.333765	non-ABT	non-ABT	87.7551	85.7143	0	15.0628
CLS00671	COG	manA	SP_0736	0.409763	non-ABT	non-ABT	99.6815	96.4968	97.4522	69.7161
CLS00672	COG	-	SP_0738	0	non-ABT	non-ABT	91.446	81.1508	81.5476	0
CLS00673	COG	mta	SP_0739	0.395834	non-ABT	non-ABT	80.3571	58.2329	58.2329	0
CLS00674	COG	-	SP_0740	0.102942	non-ABT	non-ABT	98.6755	0	0	0
CLS00675	COG	-	SP_0741	0.308403	non-ABT	non-ABT	100	96.6752	95.1407	75.7033
CLS00676	COG	-	SP_0742	0.818424	non-ABT	non-ABT	100	97.153	95.3737	0
CLS00677	COG	-	SP_0743	0	non-ABT	non-ABT	100	99.4595	98.3784	0
CLS00678	COG	comEB	SP_0744	0.278781	non-ABT	non-ABT	100	100	99.3548	0
CLS00679	COG	upp	SP_0745	0	non-ABT	non-ABT	96.2963	96.2963	96.2963	86.1111
CLS00680	COG	clpP	SP_0746	0.318525	non-ABT	non-ABT	100	99.4898	98.9796	85.7143
CLS00681	COG	-	SP_0748	0.157335	non-ABT	non-ABT	100	100	89.011	0
CLS00682	SBP	livJ	SP_0749	4.23735	ABT	ABT	99.7409	99.7409	98.7047	56.7775
CLS00683	COG	livH	SP_0750	0.124534	non-ABT	non-ABT	99.654	99.654	99.654	79.9308
CLS00684	COG	livM	SP_0751	0.25176	non-ABT	non-ABT	99.6855	98.4277	98.4277	61.9497
CLS00685	COG	livG	SP_0752	0	non-ABT	non-ABT	100	98.0315	98.8189	83.0709
CLS00686	COG	livF	SP_0753	0	non-ABT	non-ABT	99.5763	99.1525	99.5763	87.2881
CLS00687	COG	acuB	SP_0754	0.499642	non-ABT	non-ABT	98.6239	99.0826	96.789	61.6438
CLS00688	COG	prfB	-	0.665506	-	non-ABT	98.1763	97.2644	97.2644	85.1064
CLS00689	COG	ftsE	SP_0756	0.478354	non-ABT	non-ABT	99.5652	99.1304	99.1304	75.2174
CLS00690	COG	ftsX	SP_0757	0.153896	non-ABT	non-ABT	98.0707	97.4277	90.3537	56.051
CLS00691	COG	malT	SP_0758	0.257184	non-ABT	non-ABT	99.7245	96.9697	96.5565	68.9466
CLS00692	COG	-	SP_0760	0.576728	non-ABT	non-ABT	98.893	97.048	96.679	0
CLS00693	COG	rheB	SP_0761	0.332902	non-ABT	non-ABT	100	97.9866	97.0917	75.3915
CLS00694	COG	metK	SP_0762	1.67238	non-ABT	non-ABT	99.7475	98.4848	96.4646	89.4207
CLS00695	COG	pyrA	SP_0764	0.664334	non-ABT	non-ABT	99.6785	97.1061	97.1061	77.492
CLS00696	COG	holA	SP_0765	0	non-ABT	non-ABT	99.1304	95.942	96.2319	61.8497
CLS00697	COG	sodA	SP_0766	0.315763	non-ABT	non-ABT	100	99.5025	98.5075	82.266
CLS00698	COG	yutD	SP_0767	0	non-ABT	non-ABT	100	96.5909	95.4545	0
CLS00699	COG	-	-	0	-	non-ABT	0	0	0	0
CLS00700	COG	-	SP_0769	0.93128	non-ABT	non-ABT	88.75	91.875	86.25	50.8197
CLS00701	COG	-	SP_0770	0.481162	ABT	non-ABT	99.8051	98.4405	98.2456	0
CLS00702	COG	ppiA	SP_0771	1.88492	non-ABT	ABT	99.6255	97.0037	94.1606	55.3903
CLS00703	COG	-	SP_0772	1.20862	non-ABT	non-ABT	100	0	0	0
CLS00704	COG	rpsP	SP_0775	0	non-ABT	non-ABT	100	98.8889	98.8889	85.7143
CLS00705	COG	-	SP_0776	0.0833767	non-ABT	non-ABT	100	98.7342	96.2025	84.8101
CLS00706	COG	-	SP_0777	0.558992	non-ABT	non-ABT	52.2556	90.2256	89.8496	0
CLS00707	COG	rimM	SP_0778	0.436519	non-ABT	non-ABT	100	96.5116	97.093	75.5814
CLS00708	COG	trmD	SP_0779	0	non-ABT	non-ABT	98.3264	97.0833	97.9079	82.9167
CLS00709	COG	-	SP_0780	0.382936	non-ABT	non-ABT	100	99.1071	96.4286	80.3571
CLS00710	COG	-	SP_0781	0.366735	non-ABT	non-ABT	100	97.1698	96.2264	0
CLS00711	COG	-	SP_0782	0	non-ABT	non-ABT	89.8734	88.6076	0	72.1519
CLS00712	COG	bioY	SP_0783	0.407847	non-ABT	non-ABT	100	94.9438	97.191	0
CLS00713	COG	-	-	0.0648212	-	non-ABT	0	72.3881	0	0
CLS00714	COG	-	-	0.22929	-	non-ABT	0	96.3636	98.4848	0
CLS00715	COG	-	-	0.0469002	-	non-ABT	0	99.0338	98.5507	0
CLS00716	COG	-	-	0.574837	-	non-ABT	0	92.7711	92.7711	0
CLS00717	COG	gor	SP_0784	0.0214493	non-ABT	non-ABT	99.1071	98.4375	98.2143	59.7778
CLS00718	COG	hylD	SP_0785	4.63235	ABT	ABT	99.4987	92.9825	87.8109	0
CLS00719	COG	salX	SP_0786	0	non-ABT	non-ABT	100	99.1416	97.8541	75
CLS00720	COG	-	SP_0787	0.654999	non-ABT	non-ABT	99.5227	99.284	85.2029	47.8774
CLS00721	COG	metS	SP_0788	0.207312	non-ABT	non-ABT	97.7909	95.4345	94.8454	81.1679
CLS00722	COG	-	SP_0789	0.0130406	non-ABT	non-ABT	100	98.1132	0	0
CLS00723	COG	-	SP_0790	0.357979	non-ABT	non-ABT	92.4399	89.6679	0	0
CLS00724	COG	ydhF	SP_0791	1.0674	non-ABT	non-ABT	99.3506	98.3766	97.0779	0
CLS00725	COG	metG	SP_0792	0	non-ABT	non-ABT	85.2273	84.0909	84.0909	0
CLS00726	COG	fabG	SP_0793	0.292846	non-ABT	non-ABT	97.8448	93.9655	94.3966	0
CLS00727	COG	-	SP_0794	1.4089	non-ABT	non-ABT	98.7421	94.3396	96.8553	0
CLS00728	COG	-	-	0.679398	-	non-ABT	100	99.1736	94.6281	0
CLS00729	COG	-	SP_0795	0.102019	non-ABT	non-ABT	94.1581	94.1581	0	0
CLS00730	COG	-	SP_0796	0.606752	non-ABT	non-ABT	97.9452	88.3562	56.1644	57.3248
CLS00731	COG	pepN	SP_0797	0.334729	non-ABT	non-ABT	100	99.0566	95.8726	65.493
CLS00732	COG	ciaR	SP_0798	0.174936	non-ABT	non-ABT	91.0569	88.6179	90.2439	80.4878
CLS00733	COG	ciaH	SP_0799	1.76869	non-ABT	non-ABT	99.7748	97.2973	96.3964	54.6067
CLS00734	COG	-	SP_0800	1.01506	non-ABT	non-ABT	98.9474	92.6316	87.3684	0
CLS00735	COG	-	SP_0801	0.231578	non-ABT	non-ABT	99.0291	97.0874	96.7638	72.1683
CLS00737	COG	rodA	SP_0803	0.296328	non-ABT	non-ABT	99.7543	97.543	97.7887	62.1359
CLS00738	COG	yajL	SP_0804	0.0448774	non-ABT	non-ABT	99.4565	94.0217	95.6522	0
CLS00739	COG	gph	SP_0805	0.144982	non-ABT	non-ABT	98.9474	95.2632	94.2105	58.6735
CLS00740	COG	gyrB	SP_0806	1.00992	non-ABT	non-ABT	99.8457	100	98.6111	87.8462
CLS00741	CellWall	ezrA	SP_0807	2.32473	non-ABT	ABT	99.8261	97.913	82.4348	54.3253
CLS00742	COG	-	SP_0816	0.342085	non-ABT	non-ABT	0	94.9495	95.9596	70
CLS00743	COG	-	SP_0817	0.15367	non-ABT	non-ABT	0	54.6667	55.3333	39.7351
CLS00744	COG	clpE	SP_0820	0.0323087	non-ABT	non-ABT	99.734	97.7394	97.4734	82.2985
CLS00745	COG	ykuJ	SP_0822	0.0439345	non-ABT	non-ABT	100	97.3684	96.0526	76.3158
CLS00746	COG	-	SP_0823	0.13134	non-ABT	non-ABT	99.5595	89.1129	92.511	68.4211
CLS00747	COG	-	SP_0824	0.830585	non-ABT	non-ABT	99.1803	97.9508	98.3607	80.3279
CLS00748	COG	folD	SP_0825	0.258417	non-ABT	non-ABT	96.9178	96.2329	94.5205	67.8082
CLS00749	COG	-	SP_0826	0.427555	non-ABT	non-ABT	0	0	95.2381	0
CLS00750	COG	nnrD	SP_0827	0.66823	non-ABT	non-ABT	93.4483	90.6897	89.3103	52.921
CLS00751	COG	rpiA	SP_0828	0.147811	non-ABT	non-ABT	100	97.3568	94.7137	73.5683
CLS00752	COG	deoB	SP_0829	0.365618	non-ABT	non-ABT	99.2556	99.7519	98.7593	89.5782
CLS00753	COG	-	SP_0830	0.521661	non-ABT	non-ABT	75.5556	90.3226	86.5591	0
CLS00754	COG	punA	SP_0831	0.483834	non-ABT	non-ABT	99.6283	94.7955	94.4238	79.5539
CLS00755	COG	flaR	SP_0833	1.5651	non-ABT	non-ABT	49.697	26.1202	0	0
CLS00756	COG	-	SP_0834	0.59286	non-ABT	non-ABT	99.4118	0	0	0
CLS00757	COG	deoD	SP_0835	0	non-ABT	non-ABT	99.5763	97.8814	90.1961	78.3898
CLS00758	COG	flaR	SP_0837	0.398421	non-ABT	non-ABT	98.2759	77.0115	73.2955	0
CLS00759	COG	rpsT	SP_0838	0.0622498	non-ABT	non-ABT	100	100	100	88.4615
CLS00760	COG	coaA	SP_0839	0.467158	non-ABT	non-ABT	99.0196	97.7124	96.732	67.3203
CLS00761	COG	-	SP_0840	0.36235	non-ABT	non-ABT	91.7808	90.2985	88.806	0
CLS00762	COG	rsmC	SP_0841	0.607603	non-ABT	non-ABT	95.9184	94.898	89.7959	64.6465
CLS00763	COG	deoA	SP_0842	0.650445	non-ABT	non-ABT	99.0588	95.2941	94.8235	72.7059
CLS00764	COG	deoC	SP_0843	0	non-ABT	non-ABT	96.3636	94.0909	92.2727	71.8182
CLS00765	COG	cdd1	SP_0844	0.470964	non-ABT	non-ABT	100	98.4496	94.5736	61.1111
CLS00766	SBP	pnrA	SP_0845	4.69695	non-ABT	ABT	99.4286	98.2857	96	70.5382
CLS00767	COG	mglA	SP_0846	0	non-ABT	non-ABT	83.3659	98.8258	99.0215	79.0607
CLS00768	COG	mglC	SP_0847	0.279105	non-ABT	non-ABT	99.4318	98.2955	99.1477	71.7877
CLS00769	COG	-	SP_0848	0.000346301	non-ABT	non-ABT	100	97.7987	98.1132	79.8742
CLS00770	COG	-	SP_2154	0.843605	non-ABT	non-ABT	95.5056	76.1062	35.6021	38.7435
CLS00771	COG	-	SP_1613	0	non-ABT	non-ABT	69.0265	57.5221	43.2432	36.3309
CLS00772	COG	plsY	SP_0851	0.0723281	non-ABT	non-ABT	100	96.7136	95.3052	61.9718
CLS00773	COG	parE	SP_0852	0.0440216	non-ABT	non-ABT	99.6909	98.609	98.7673	89.6764
CLS00774	COG	-	SP_0853	0	non-ABT	non-ABT	0	0	0	0
CLS00775	COG	-	SP_0854	0	non-ABT	non-ABT	0	0	0	0
CLS00776	COG	parC	SP_0855	1.29387	non-ABT	non-ABT	97.9344	95.5043	94.8967	76.6061
CLS00777	COG	ilvE	SP_0856	0.169356	non-ABT	non-ABT	99.4118	99.1176	97.9412	83.871
CLS00778	COG	-	SP_0857	0.154385	non-ABT	non-ABT	97.8632	88.1633	0	0
CLS00779	COG	-	SP_0858	0.30588	non-ABT	non-ABT	100	99.5633	0	0
CLS00780	COG	-	SP_0859	0.14988	non-ABT	non-ABT	100	100	0	0
CLS00781	COG	pcp	SP_0860	0.205066	non-ABT	non-ABT	100	100	0	0
CLS00782	COG	-	SP_0861	0.0629014	non-ABT	non-ABT	100	97.3684	98.6842	0
CLS00783	COG	rpsA	SP_0862	0.656507	non-ABT	non-ABT	100	99	98.75	82
CLS00784	COG	msrC	SP_0864	0.427955	non-ABT	non-ABT	100	95.1515	93.3333	63.6364
CLS00785	COG	dnaX	SP_0865	0.481461	non-ABT	non-ABT	99.274	96.7332	96.3702	62.0567
CLS00786	COG	-	SP_0866	0.115299	non-ABT	non-ABT	100	100	93.75	0
CLS00787	COG	sufC	SP_0867	0.692589	non-ABT	non-ABT	97.3384	97.3384	96.9582	87.8327
CLS00788	COG	sufD	SP_0868	0.584623	non-ABT	non-ABT	99.5238	97.619	97.8571	77.1429
CLS00789	COG	sufS	SP_0869	1.0912	non-ABT	non-ABT	99.0196	95.8333	95.5882	74.8166
CLS00790	COG	iscU	SP_0870	0.170032	non-ABT	non-ABT	99.3151	97.9452	95.2055	77.3973
CLS00791	COG	sufB	SP_0871	0	non-ABT	non-ABT	99.5745	97.8723	99.1489	88.3227
CLS00792	CellWall	pbp3	SP_0872	2.02801	non-ABT	ABT	99.5157	96.6102	93.4625	52.4038
CLS00793	COG	-	SP_0873	0.284307	non-ABT	non-ABT	100	98.916	89.4309	0
CLS00794	COG	fruR	SP_0875	0.775384	non-ABT	non-ABT	100	97.9675	97.1545	53.9623
CLS00795	COG	fruK	SP_0876	0.426986	non-ABT	non-ABT	100	96.3696	96.0396	75.2475
CLS00796	COG	fruA	SP_0877	1.0322	non-ABT	non-ABT	100	97.8528	98.3077	72.561
CLS00797	CellWall	ftsK	SP_0878	2.00638	non-ABT	ABT	96.7172	95.176	95.176	69.0088
CLS00798	COG	-	SP_0879	0	non-ABT	non-ABT	86.7133	86.8056	80.137	0
CLS00799	COG	-	SP_0880	0.881795	non-ABT	non-ABT	93.8144	94.5876	94.8454	71.134
CLS00800	COG	thiI	SP_0881	0.259517	non-ABT	non-ABT	98.5149	98.5149	98.7624	83.2099
CLS00801	COG	-	SP_0884	0.937015	non-ABT	non-ABT	42.2764	84.5528	84.9593	45.6
CLS00803	COG	spnTVRhsdM	SP_0886	0.0904132	non-ABT	non-ABT	99.7988	99.3964	0	0
CLS00804	COG	spnTVRhsdS	SP_0891	4.71277	non-ABT	ABT	29.0323	28.5024	0	0
CLS00805	COG	tvrA	SP_0888	0.0286008	non-ABT	non-ABT	0	100	97.4359	0
CLS00806	COG	tvrT	SP_0889	0.430155	non-ABT	non-ABT	0	96.3504	62.7737	0
CLS00807	COG	tvrR	SP_0890	0.31683	non-ABT	non-ABT	0	99.3769	0	0
CLS00808	COG	spnTVRhsdR	SP_0892	0.706783	non-ABT	non-ABT	99.6416	98.5663	0	0
CLS00809	COG	argR	SP_0893	0.829944	non-ABT	non-ABT	99.359	87.8205	91.6667	0
CLS00810	COG	pepXP	SP_0894	1.71068	non-ABT	non-ABT	99.7358	92.6024	89.7368	56.8421
CLS00811	COG	dnaE	SP_0895	0.292831	non-ABT	non-ABT	99.9032	96.4182	93.7076	57.9304
CLS00812	COG	pfkA	SP_0896	0.598434	non-ABT	non-ABT	99.1045	98.806	96.1194	75.9644
CLS00814	COG	-	SP_0899	0.13042	non-ABT	non-ABT	100	96.5517	0	0
CLS00815	COG	-	SP_0901	0.226692	non-ABT	non-ABT	98.0583	93.2039	93.2039	0
CLS00816	COG	-	SP_0902	0.239639	non-ABT	non-ABT	79.4118	73.9496	77.3109	0
CLS00817	COG	-	SP_0904	1.02675	non-ABT	non-ABT	99.262	98.893	95.572	63.8376
CLS00818	COG	-	SP_0905	0.0508509	non-ABT	non-ABT	99.3355	99.0033	97.3422	63.7874
CLS00819	COG	-	SP_0906	0	non-ABT	non-ABT	0	0	0	0
CLS00820	COG	yhgF	SP_0908	1.51465	non-ABT	non-ABT	87.4534	87.4534	86.5839	64.9689
CLS00821	COG	-	SP_0909	0	non-ABT	non-ABT	95.302	95.9732	96.6443	0
CLS00822	COG	-	SP_0910	0.542936	non-ABT	non-ABT	90	89	89	0
CLS00823	COG	-	SP_0912	0	non-ABT	non-ABT	92.6199	92.6199	92.2509	51.8382
CLS00824	COG	-	SP_0913	0.327731	non-ABT	non-ABT	97.5831	96.3746	95.6193	0
CLS00825	COG	-	SP_0914	0.546947	ABT	non-ABT	97.9592	80.5195	77.4892	59.9138
CLS00826	COG	speA	SP_0916	0.934496	non-ABT	non-ABT	99.1853	97.3523	0	0
CLS00827	COG	speE	SP_0918	0.00271979	non-ABT	non-ABT	99.6503	99.3007	0	0
CLS00828	COG	lys	SP_0919	0.37996	non-ABT	non-ABT	99.7613	98.568	0	0
CLS00829	COG	nspC	SP_0920	1.37146	non-ABT	non-ABT	100	97.0667	0	0
CLS00830	COG	aguA	SP_0921	0.785536	non-ABT	non-ABT	99.723	98.338	0	0
CLS00831	COG	aguB	SP_0922	0.282197	non-ABT	non-ABT	99.3127	95.189	0	0
CLS00832	COG	-	SP_0923	0.656757	non-ABT	non-ABT	98.513	94.4238	93.6803	0
CLS00833	COG	-	SP_0925	0.454423	non-ABT	non-ABT	97.3094	90.1345	0	0
CLS00834	COG	smrC	SP_0927	0	non-ABT	non-ABT	99.3377	99.3377	99.3377	69.8675
CLS00835	COG	lspA	SP_0928	0.0920589	non-ABT	non-ABT	99.3464	94.7712	95.4248	59.0909
CLS00836	COG	rluD	SP_0929	0.672895	non-ABT	non-ABT	98.9831	96.9492	96.2712	75.3378
CLS00837	CellWall	lytD	SP_0930	4.026	ABT	ABT	95.8533	98.4051	93.3014	0
CLS00838	COG	proB	SP_0931	0.653707	non-ABT	non-ABT	98.1383	96.0106	95.7447	0
CLS00839	COG	proA	SP_0932	1.45887	non-ABT	non-ABT	98.8095	96.6667	93.5714	50
CLS00840	COG	proC	SP_0933	0	non-ABT	non-ABT	96.2264	96.6038	94.717	0
CLS00841	COG	tmk	SP_0935	0.0405394	non-ABT	non-ABT	97.6415	99.5283	95.7547	62.9108
CLS00842	COG	holB	SP_0936	0.862263	non-ABT	non-ABT	99.3243	99.3243	97.6351	46.6216
CLS00843	COG	-	SP_0937	0.714081	non-ABT	non-ABT	100	100	100	0
CLS00844	COG	rsmI	SP_0938	0.335999	non-ABT	non-ABT	97.5779	97.6027	96.5398	70.1031
CLS00845	COG	-	SP_0939	0.345933	non-ABT	non-ABT	94.4751	0	0	0
CLS00847	COG	trmFO	SP_0943	0	ABT	non-ABT	99.3243	99.3243	96.0526	79.955
CLS00848	COG	pyrH	SP_0944	0.708453	non-ABT	non-ABT	99.5918	99.5918	99.5918	82.0408
CLS00849	COG	rrf	SP_0945	0.0127721	non-ABT	non-ABT	99.4595	99.4595	99.4595	88.1081
CLS00850	COG	cvfB	SP_0946	0	non-ABT	non-ABT	95.9322	95.2542	94.9153	72.3906
CLS00851	COG	-	SP_0947	0.0761401	non-ABT	non-ABT	100	97.1831	97.1831	0
CLS00852	COG	ybeZ	SP_0948	0.0108452	non-ABT	non-ABT	100	94.3114	93.4132	82.3529
CLS00853	COG	-	SP_0950	0.2339	non-ABT	non-ABT	98.7952	0	0	0
CLS00854	COG	-	SP_0951	0.377347	non-ABT	non-ABT	98.6667	0	0	0
CLS00855	COG	ald2	-	0	-	non-ABT	100	0	0	0
CLS00856	COG	-	-	0.512352	-	non-ABT	0	0	0	0
CLS00857	COG	ald1	SP_0952	0.625195	ABT	non-ABT	99.2908	0	0	0
CLS00858	COG	-	SP_0953	0.0651025	non-ABT	non-ABT	95.7672	91.5344	92.0635	0
CLS00859	COG	comEA	SP_0954	1.09508	non-ABT	non-ABT	99.537	98.6111	91.2037	0
CLS00861	COG	-	SP_0956	0.562068	non-ABT	non-ABT	0	0	0	0
CLS00862	COG	-	SP_0957	0.199353	non-ABT	non-ABT	77.2277	87.2549	85.1485	0
CLS00863	COG	-	SP_0958	0.517112	non-ABT	non-ABT	96.4377	88.5787	87.0558	0
CLS00864	COG	infC	SP_0959	0.205128	non-ABT	non-ABT	94.8718	94.8718	94.8718	81.3725
CLS00865	COG	rpmI	SP_0960	0.050456	non-ABT	non-ABT	100	100	100	96.9697
CLS00866	COG	rplT	SP_0961	0.0372623	non-ABT	non-ABT	100	100	99.1597	94.958
CLS00867	COG	lguL	SP_0962	0.295585	non-ABT	non-ABT	88.1119	88.1119	87.4126	0
CLS00868	COG	pyrK	SP_0963	0.807897	non-ABT	non-ABT	100	98.8722	95.8647	59.7015
CLS00869	COG	pyrD	SP_0964	0.793247	non-ABT	non-ABT	99.359	100	97.1154	79.4872
CLS00870	COG	lytB	SP_0965	1.90671	non-ABT	non-ABT	87.037	96.4169	88.5993	0
CLS00871	COG	pavA	SP_0966	0	non-ABT	non-ABT	99.274	96.7332	96.9147	70.7804
CLS00872	COG	ybeY	SP_0967	0.308803	non-ABT	non-ABT	100	99.3939	100	81.2121
CLS00873	COG	dgk	SP_0968	0.1604	non-ABT	non-ABT	99.2366	99.2366	97.7099	75.9124
CLS00874	COG	era	SP_0969	0.0316674	non-ABT	non-ABT	100	98.9967	98.9967	91.6388
CLS00875	COG	mutM	SP_0970	0.265425	non-ABT	non-ABT	98.9051	95.9854	91.2409	62.0438
CLS00876	COG	coaE	SP_0971	0.286467	non-ABT	non-ABT	98.01	98.01	85.0746	54.1463
CLS00877	COG	-	SP_0972	0.243237	non-ABT	non-ABT	100	83.0867	97.7444	60.9023
CLS00878	COG	secG	SP_0974	0.31442	non-ABT	non-ABT	100	100	100	0
CLS00879	COG	rnr	SP_0975	0.377896	non-ABT	non-ABT	99.2347	97.1939	96.8112	68.9786
CLS00880	COG	smpB	SP_0976	0.450805	non-ABT	non-ABT	100	99.3548	100	78.0645
CLS00881	COG	tehB	SP_0977	0.654026	non-ABT	non-ABT	100	80.0699	93.7063	49.8294
CLS00882	COG	coiA	SP_0978	0.0414739	non-ABT	non-ABT	99.0536	89.2744	91.1672	0
CLS00883	COG	pepF1	SP_0979	0.814859	non-ABT	non-ABT	100	98.6667	97.1667	68
CLS00884	COG	-	SP_0980	1.10813	non-ABT	non-ABT	100	97.4684	97.4684	72.9958
CLS00885	COG	ppmA	SP_0981	3.52618	non-ABT	ABT	100	95.5272	92.6518	0
CLS00886	COG	-	SP_0984	0.562833	non-ABT	non-ABT	99.5146	95.1456	93.6893	59.1346
CLS00887	COG	ybaK	SP_0985	0.342688	non-ABT	non-ABT	99.375	96.875	93.7888	66.875
CLS00888	COG	-	SP_0986	0.398277	non-ABT	non-ABT	98.9286	97.5	97.1429	66.4286
CLS00889	COG	-	SP_0987	1.39168	non-ABT	non-ABT	98.8722	96.6165	91.7293	47.2028
CLS00890	COG	glmU	SP_0988	0	non-ABT	non-ABT	95.4071	93.9457	93.5282	72.2338
CLS00891	COG	nudF	SP_0989	0.167149	non-ABT	non-ABT	99.4475	97.2376	97.7901	63.9344
CLS00892	COG	-	SP_0990	1.14041	non-ABT	non-ABT	99.0385	98.0769	95.1923	0
CLS00893	COG	mtnN	SP_0991	0.894633	non-ABT	non-ABT	99.1304	96.087	96.5217	59.7403
CLS00894	COG	-	SP_0992	0.38954	non-ABT	non-ABT	100	100	100	75.4386
CLS00895	COG	dnaQ	SP_0993	0.112253	non-ABT	non-ABT	100	100	96.4286	0
CLS00896	COG	ugpQ	SP_0994	0.154267	non-ABT	non-ABT	98.8075	98.6371	64.3952	0
CLS00897	COG	-	SP_0998	0.679236	non-ABT	non-ABT	97.1014	17.351	0	0
CLS00898	COG	ccdA2	SP_0999	0.0394179	non-ABT	non-ABT	100	97.0213	57.0213	0
CLS00899	COG	etrx2	SP_1000	0.123214	non-ABT	non-ABT	98.9189	96.2162	90.4255	0
CLS00900	COG	yfnA	SP_1001	0	non-ABT	non-ABT	99.1361	97.8402	97.4082	68.9362
CLS00901	COG	adcAII	SP_1002	0.553978	non-ABT	non-ABT	97.4277	95.4984	95.1768	0
CLS00902	Adhesin	phtBD	SP_1174	5.26682	ABT	ABT	42.0375	0	31.068	0
CLS00903	Adhesin	phtE	SP_1004	5.79454	ABT	ABT	99.23	43.5824	42.2576	0
CLS00904	Adhesin	phtE (fragment)	-	3.16481	-	ABT	68.2464	0	0	0
CLS00905	COG	-	SP_1007	0.304535	non-ABT	non-ABT	97.1292	71.3004	0	0
CLS00906	COG	pepT	SP_1008	0.523957	non-ABT	non-ABT	97.543	98.5258	94.8905	73.4644
CLS00907	COG	hemH	SP_1009	0.776482	non-ABT	non-ABT	99.7253	98.3516	97.5275	0
CLS00908	COG	mscL	SP_1010	0.122303	non-ABT	non-ABT	100	98.4	78.125	0
CLS00909	COG	-	SP_1011	0.471058	non-ABT	non-ABT	100	96.5035	74.8252	0
CLS00910	COG	-	SP_1012	0.099613	non-ABT	non-ABT	87.5648	87.5648	87.0466	55.1546
CLS00912	COG	dapA	SP_1014	0.845671	non-ABT	non-ABT	97.7492	98.3923	99.3569	72.0257
CLS00913	COG	trmE	SP_1016	0.468589	non-ABT	non-ABT	99.1247	98.4683	96.9365	83.151
CLS00914	COG	xylH	SP_1017	0.230147	non-ABT	non-ABT	100	100	100	0
CLS00915	COG	tdk	SP_1018	0.100738	non-ABT	non-ABT	94.4724	97.449	93.9698	67.2986
CLS00917	COG	hemK	SP_1021	0.892456	non-ABT	non-ABT	94.9821	90.3226	89.6057	57.6512
CLS00918	COG	rimN	SP_1022	0.547823	non-ABT	non-ABT	98.5	97	94	57.5
CLS00919	COG	-	SP_1023	0.570534	non-ABT	non-ABT	99.3007	93.7063	88.1119	0
CLS00920	COG	glyA	SP_1024	0.631213	non-ABT	non-ABT	99.5215	98.3254	98.5646	80.2381
CLS00921	COG	-	SP_1025	1.97432	non-ABT	non-ABT	99.6914	98.4568	98.1481	65.4434
CLS00922	COG	-	SP_1026	0.783144	non-ABT	non-ABT	99.5098	96.5686	95.5882	52.1951
CLS00924	COG	rumA1	SP_1029	0.347698	non-ABT	non-ABT	99.2634	78.0847	78.6372	59.3002
CLS00925	COG	-	SP_1030	0.174292	non-ABT	non-ABT	98.6111	0	0	0
CLS00926	SBP	piaA	SP_1032	4.43306	non-ABT	ABT	100	0	0	0
CLS00927	COG	piaB	SP_1033	0.137736	non-ABT	non-ABT	99.7015	0	0	0
CLS00928	COG	piaC	SP_1034	0.316925	non-ABT	non-ABT	100	0	0	0
CLS00929	COG	piaD	SP_1035	0.745385	non-ABT	non-ABT	99.2424	0	0	0
CLS00930	COG	-	SP_1037	0.362342	non-ABT	non-ABT	81.4815	0	0	0
CLS00931	COG	-	-	0.0464326	-	non-ABT	0	0	0	0
CLS00932	COG	-	-	0.219525	-	non-ABT	0	0	0	0
CLS00933	COG	-	-	0.193299	-	non-ABT	0	0	0	0
CLS00934	COG	-	-	0.00243963	-	non-ABT	0	0	0	0
CLS00935	COG	-	SP_1039	0	non-ABT	non-ABT	100	0	0	0
CLS00936	COG	-	SP_1040	0.549627	non-ABT	non-ABT	99.1055	0	0	0
CLS00937	COG	-	SP_1041	0.323325	non-ABT	non-ABT	99.4681	0	88.2979	0
CLS00939	COG	-	SP_1043	0.402208	non-ABT	non-ABT	86.7647	0	92.126	0
CLS00940	COG	-	SP_1044	0.155375	non-ABT	non-ABT	99.2958	0	93.3099	0
CLS00941	COG	-	SP_1045	0.359947	non-ABT	non-ABT	99.6599	0	96.9388	0
CLS00942	COG	nplT	SP_1046	0.524228	non-ABT	non-ABT	63.0397	0	58.0034	0
CLS00943	COG	-	SP_1048	0.352229	non-ABT	non-ABT	61.5894	0	63.5514	0
CLS00944	COG	pezA	SP_1050	0.56818	non-ABT	non-ABT	97.4684	0	97.4684	0
CLS00945	COG	pezT	SP_1051	0.172501	non-ABT	non-ABT	98.419	0	91.0156	0
CLS00946	COG	-	SP_1053	0.476651	non-ABT	non-ABT	100	0	0	0
CLS00947	COG	tnp	SP_1054	0.413778	non-ABT	non-ABT	62.1849	0	0	0
CLS00948	COG	-	SP_1055	0.000742892	non-ABT	non-ABT	87.6033	0	0	0
CLS00949	COG	-	SP_1056	0.483466	non-ABT	non-ABT	43.8228	0	0	0
CLS00950	COG	-	-	0.396653	-	non-ABT	96.4789	55.9028	0	0
CLS00951	COG	-	-	0.0778484	-	non-ABT	0	0	0	0
CLS00952	COG	-	SP_1308	0.0694531	non-ABT	non-ABT	17.2414	0	0	0
CLS00953	COG	-	SP_1307	0.024921	non-ABT	non-ABT	100	0	0	0
CLS00954	COG	-	-	0.565598	-	non-ABT	0	0	0	0
CLS00955	COG	-	-	0.0804899	-	non-ABT	0	0	0	0
CLS00956	COG	-	-	0	-	non-ABT	0	0	0	0
CLS00957	COG	-	-	0.0756225	-	non-ABT	100	0	0	0
CLS00958	COG	ftsW	SP_1067	0.271148	non-ABT	non-ABT	99.7555	98.7775	81.4181	61.1765
CLS00959	COG	ppc	SP_1068	0.1956	non-ABT	non-ABT	99.7773	98.7751	93.6526	70.3418
CLS00960	SBP	trpX	SP_1069	3.15699	non-ABT	ABT	96.5116	94.4767	91.8605	61.1594
CLS00961	COG	trpY	SP_1070	0.187875	non-ABT	non-ABT	99.6528	98.9583	91.6399	73.7024
CLS00962	COG	trpZ	SP_1071	0.16833	non-ABT	non-ABT	96.4286	97.619	96.8254	80.1587
CLS00963	COG	dnaG	SP_1072	0.663416	non-ABT	non-ABT	98.2935	97.7816	97.099	39.4915
CLS00964	COG	sigA	SP_1073	0.578549	non-ABT	non-ABT	100	98.916	98.374	86.5229
CLS00965	COG	-	SP_1074	0	non-ABT	non-ABT	90.8333	89.1667	89.1667	71.6667
CLS00966	COG	cpoA	SP_1075	0.212127	non-ABT	non-ABT	92.7807	88.7701	89.8396	0
CLS00967	COG	mgtA	SP_1076	0	non-ABT	non-ABT	99.3197	97.2789	96.1451	61.4699
CLS00968	COG	-	SP_1077	0.0126906	non-ABT	non-ABT	98.2759	77.7778	86.2069	0
CLS00969	COG	-	SP_1078	0.0949777	non-ABT	non-ABT	0	0	0	0
CLS00970	COG	obgE	SP_1079	0.317588	non-ABT	non-ABT	99.0826	99.5413	98.8532	85.0917
CLS00971	COG	-	SP_1080	0.00904045	non-ABT	non-ABT	98.0769	98.0769	100	0
CLS00972	COG	murZ	SP_1081	0	non-ABT	non-ABT	99.7613	97.136	97.136	78.2816
CLS00973	COG	-	SP_1082	0.601541	non-ABT	non-ABT	99.4536	96.1749	96.1749	54.8913
CLS00974	COG	-	SP_1083	0	non-ABT	non-ABT	100	98.1176	99.5294	56.4403
CLS00975	COG	map	SP_1084	0.30699	non-ABT	non-ABT	100	99.6503	99.6503	87.0629
CLS00976	COG	pcrA	SP_1087	0.644357	non-ABT	non-ABT	99.8689	97.1166	96.5924	76.8229
CLS00977	COG	radC	SP_1088	0.479495	non-ABT	non-ABT	99.115	97.3451	97.3451	58.4071
CLS00978	COG	-	SP_1089	0.416016	non-ABT	non-ABT	98.69	95.1965	94.3231	58.8745
CLS00979	COG	rex	SP_1090	0.0185652	non-ABT	non-ABT	99.5305	99.5305	99.061	77.6744
CLS00980	COG	-	SP_1092	0	non-ABT	non-ABT	98.5915	88.7324	83.0986	0
CLS00981	COG	-	SP_1093	0.0414919	non-ABT	non-ABT	100	99.1304	98.2609	70.4348
CLS00982	COG	-	SP_1094	0	non-ABT	non-ABT	99.1914	95.9569	95.4178	58.871
CLS00983	COG	prs	SP_1095	0.580362	non-ABT	non-ABT	100	99.0596	96.5517	75.1534
CLS00984	COG	yjbK	SP_1096	0.423034	non-ABT	non-ABT	98.9418	92.5926	93.6508	0
CLS00985	COG	yjbM	SP_1097	0.818673	non-ABT	non-ABT	99.1031	97.3094	96.861	75.3363
CLS00986	COG	ppnK	SP_1098	0	non-ABT	non-ABT	99.6324	97.4265	98.1618	65.343
CLS00987	COG	rluA3	SP_1099	0.109851	non-ABT	non-ABT	100	96.6443	95.6376	67.7852
CLS00988	COG	pta	SP_1100	0.370768	non-ABT	non-ABT	99.6914	98.4568	96.6049	59.6386
CLS00989	COG	-	SP_1102	0.167582	non-ABT	non-ABT	100	97.9798	100	76.7677
CLS00990	COG	-	SP_1104	0.311969	non-ABT	non-ABT	100	96.9565	0	0
CLS00991	COG	rplU	SP_1105	0	non-ABT	non-ABT	100	100	100	89.4231
CLS00992	COG	-	SP_1106	0.0491598	non-ABT	non-ABT	99.1228	99.1228	99.1228	0
CLS00993	COG	rpmA	SP_1107	0.122071	non-ABT	non-ABT	100	100	100	94.8454
CLS00994	COG	ribF	SP_1110	0.525338	non-ABT	non-ABT	100	98.3607	98.3607	53.4202
CLS00995	COG	-	SP_1111	0.145804	non-ABT	non-ABT	100	97.1631	96.4539	0
CLS00996	COG	-	SP_1112	1.80686	non-ABT	non-ABT	99.2832	95.6989	94.9821	68.9286
CLS00997	COG	hupB	SP_1113	0	non-ABT	non-ABT	100	100	94.5055	89.011
CLS00998	COG	yjjK	SP_1114	0	non-ABT	non-ABT	98.2622	97.7883	96.9984	73.9812
CLS00999	COG	rggD	SP_1115	0.748157	non-ABT	non-ABT	98.9547	91.9861	91.6376	0
CLS01000	COG	-	SP_1116	0.27609	non-ABT	non-ABT	99.4898	98.4694	79.8469	0
CLS01001	COG	ligA	SP_1117	1.12083	non-ABT	non-ABT	99.0798	96.0123	95.092	71.1656
CLS01002	COG	pulI	SP_1118	0.316176	non-ABT	non-ABT	99.7365	97.1014	92.0949	51.3342
CLS01003	COG	gapN	SP_1119	0.144826	non-ABT	non-ABT	99.3671	0	0	73.0526
CLS01004	COG	glgB	SP_1121	0.275328	non-ABT	non-ABT	99.2212	92.9907	92.0561	75.1553
CLS01005	COG	glgC	SP_1122	0.369285	non-ABT	non-ABT	99.2105	98.4211	96.3158	82.1053
CLS01006	COG	glgD	SP_1123	0.845012	non-ABT	non-ABT	99.4723	97.6253	93.6675	61.7414
CLS01007	COG	glgA	SP_1124	0.00697995	ABT	non-ABT	99.1614	96.6457	96.6457	71.4885
CLS01008	COG	serB	SP_1125	0.162722	non-ABT	non-ABT	0	0	0	0
CLS01009	COG	-	-	0.352116	-	non-ABT	0	42.9907	45.3271	0
CLS01010	COG	glxK	SP_1126	0.770461	non-ABT	non-ABT	70.9333	51.7333	66.4	37.8667
CLS01011	COG	-	SP_1127	0.247458	non-ABT	non-ABT	99.3243	94.5946	92.5676	0
CLS01012	COG	eno	SP_1128	0	non-ABT	non-ABT	99.7696	99.0783	97.235	92.3963
CLS01013	COG	rexB	SP_1151	1.27079	non-ABT	non-ABT	98.2727	93.2727	93.1818	0
CLS01014	COG	rexA	SP_1152	1.36237	non-ABT	non-ABT	98.8487	94.5724	93.8322	52.9935
CLS01015	COG	-	SP_1153	0.451398	non-ABT	non-ABT	98.9796	95.6633	95.4082	0
CLS01018	COG	rbgA	SP_1155	0.471961	non-ABT	non-ABT	99.6466	97.1731	98.9399	77.0318
CLS01019	COG	rnhB	SP_1156	0.0377418	non-ABT	non-ABT	99.6139	90.7336	93.4363	64.8855
CLS01020	COG	clcA	SP_1157	0.144621	non-ABT	non-ABT	100	94.8077	92.6357	0
CLS01021	COG	xerC	SP_1159	0.0757097	non-ABT	non-ABT	100	98.0337	98.5955	82.8652
CLS01022	COG	lplA	SP_1160	0.719304	non-ABT	non-ABT	99.3921	0	0	65.6535
CLS01023	COG	acoL	SP_1161	2.17105	non-ABT	ABT	99.6473	0	0	59.2217
CLS01024	COG	acoC	SP_1162	0.789447	non-ABT	non-ABT	99.7118	0	0	43.1034
CLS01025	COG	pdhB	SP_1163	0.338605	non-ABT	non-ABT	99.3939	0	0	68.2779
CLS01026	COG	acoA	SP_1164	0.560998	non-ABT	non-ABT	99.0683	0	0	59.3168
CLS01027	COG	norM	SP_1166	0.225208	non-ABT	non-ABT	99.117	95.8057	93.819	0
CLS01028	COG	pyrC	SP_1167	0.355552	non-ABT	non-ABT	98.5782	96.2085	95.9716	78.436
CLS01029	COG	mutX	SP_1168	0.555885	non-ABT	non-ABT	98.7013	99.3506	99.3506	69.1824
CLS01031	COG	-	SP_1170	0.606888	non-ABT	non-ABT	99.5349	98.6047	0	0
CLS01032	COG	yfnB	SP_1171	0.0108419	non-ABT	non-ABT	99.5781	97.4684	91.5612	60.7595
CLS01033	COG	dhaM	SP_1173	0.249371	non-ABT	non-ABT	39.6825	88.8889	47.619	0
CLS01034	COG	ptsI	SP_1176	0.836985	non-ABT	non-ABT	100	97.9094	97.2125	88.0416
CLS01035	COG	ptsH	SP_1177	0.0245984	non-ABT	non-ABT	100	100	98.8506	93.1034
CLS01036	COG	nrdH	SP_1178	0.20798	non-ABT	non-ABT	98.6111	97.2222	95.8333	0
CLS01037	COG	nrdE	SP_1179	0	non-ABT	non-ABT	99.8609	99.5828	98.0529	84.701
CLS01038	COG	nrdB	SP_1180	0.178483	non-ABT	non-ABT	99.6875	99.6875	98.4424	86.25
CLS01039	COG	lacR2	SP_1182	0.245888	non-ABT	non-ABT	99.6047	97.6285	82.3529	0
CLS01041	COG	lacG2	SP_1184	0.17023	non-ABT	non-ABT	99.1453	95.2991	95.7265	90.1709
CLS01042	COG	lacE2	SP_1185	0.1539	non-ABT	non-ABT	81.5603	81.5603	81.5603	72.7592
CLS01043	COG	lacF2	SP_1186	0	non-ABT	non-ABT	100	98.0952	98.0952	75.2381
CLS01044	COG	lacT2	SP_1187	0.110041	non-ABT	non-ABT	97.8417	97.482	97.482	0
CLS01045	COG	lacD2	SP_1190	0.666148	non-ABT	non-ABT	99.3865	99.3865	99.3865	82.2086
CLS01046	COG	lacC2	SP_1191	0.474343	non-ABT	non-ABT	99.6764	98.0583	98.0583	64.8387
CLS01047	COG	lacB	SP_1192	0.197968	non-ABT	non-ABT	98.8304	97.6608	98.8304	75.4386
CLS01048	COG	lacA	SP_1193	0.0434215	non-ABT	non-ABT	100	98.5816	97.1631	71.831
CLS01049	COG	-	SP_1194	0.426586	non-ABT	non-ABT	98.2456	0	33.2215	21.1409
CLS01050	COG	lepA	SP_1200	0.284462	non-ABT	non-ABT	99.6705	99.0115	99.0115	90.671
CLS01051	COG	pphA	SP_1201	0.290368	non-ABT	non-ABT	99.5868	96.6942	96.281	0
CLS01052	COG	recN	SP_1202	0.256179	non-ABT	non-ABT	99.4595	97.2973	98.3784	71.3514
CLS01053	COG	ahrC	SP_1203	0.214131	non-ABT	non-ABT	89.5105	95.8042	94.4056	0
CLS01054	COG	tylA	SP_1204	0.452102	non-ABT	non-ABT	99.262	95.572	94.0959	74.9091
CLS01055	COG	ispA	SP_1205	0.22115	non-ABT	non-ABT	98.9691	95.5326	95.189	57.732
CLS01056	COG	xseB	SP_1206	0.500279	non-ABT	non-ABT	100	98.5714	100	0
CLS01057	COG	xseA	SP_1207	0	non-ABT	non-ABT	99.1031	97.3094	96.861	67.3289
CLS01058	COG	udk	SP_1208	0.267795	non-ABT	non-ABT	100	98.1132	98.5849	76.4706
CLS01059	COG	-	SP_1210	0.104133	non-ABT	non-ABT	100	98	0	0
CLS01060	COG	truB	SP_1212	0.1691	non-ABT	non-ABT	98.2877	95.2055	95.2055	62.5828
CLS01061	COG	-	SP_1213	1.81759	non-ABT	non-ABT	99.5283	97.8774	92.7928	75.8782
CLS01062	COG	mdeA	SP_1214	0.358466	non-ABT	non-ABT	99.4609	24.2588	81.6901	65.9624
CLS01063	COG	-	-	0.00389535	-	non-ABT	0	0	0	0
CLS01064	COG	-	SP_1215	0.181065	non-ABT	non-ABT	100	0	98.1132	0
CLS01065	CellWall	srtA	SP_1218	3.35631	non-ABT	ABT	100	97.166	95.1417	57.2581
CLS01066	COG	gyrA	SP_1219	1.77128	non-ABT	non-ABT	97.3841	96.0761	93.9358	81.5166
CLS01067	COG	ldhA	SP_1220	0.216283	non-ABT	non-ABT	98.494	90.6627	97.2892	87.0482
CLS01068	COG	-	SP_1221	0.719743	ABT	non-ABT	100	94.5622	0	0
CLS01069	COG	-	SP_1222	0	non-ABT	non-ABT	98.8854	95.7006	0	17.5633
CLS01070	COG	-	SP_1223	0	non-ABT	non-ABT	100	96.5517	0	0
CLS01071	COG	-	SP_1224	0	non-ABT	non-ABT	100	98.75	0	0
CLS01072	COG	vicX	SP_1225	0.177785	non-ABT	non-ABT	100	98.513	97.7695	77.3234
CLS01073	COG	micB	SP_1226	1.48969	non-ABT	non-ABT	99.7773	98.6637	90.2004	65.2747
CLS01074	COG	yycF	SP_1227	0.354321	ABT	non-ABT	99.5726	98.7179	92.766	77.9661
CLS01075	COG	mutY	SP_1228	0.10792	non-ABT	non-ABT	100	95.1407	87.0968	62.5954
CLS01076	COG	fhs	SP_1229	0.787362	non-ABT	non-ABT	99.4604	98.5612	98.0216	84.8921
CLS01077	COG	coaB	SP_1230	0.588243	non-ABT	non-ABT	97.4359	91.453	88.8889	54.2735
CLS01078	COG	coaC	SP_1231	0.129175	non-ABT	non-ABT	100	96.7213	95.082	59.7826
CLS01079	COG	panT	SP_1232	0.157404	non-ABT	non-ABT	100	99.4652	96.7914	69.4737
CLS01080	COG	niaX	SP_1233	0.237911	non-ABT	non-ABT	100	97.1429	94.8571	0
CLS01081	COG	-	SP_1234	0.0774742	non-ABT	non-ABT	100	97.076	95.9064	0
CLS01082	COG	-	SP_1235	0.295481	non-ABT	non-ABT	100	94.1935	91.7722	0
CLS01083	COG	bltD	SP_1236	0.124006	non-ABT	non-ABT	100	95.0617	94.4444	0
CLS01085	COG	-	SP_1237	0.0210054	non-ABT	non-ABT	100	89.3048	98.9305	0
CLS01086	COG	uvrB	SP_1238	0.291816	non-ABT	non-ABT	99.8489	99.3958	99.2447	88.9894
CLS01087	COG	-	SP_1240	0.21249	non-ABT	non-ABT	99.6845	72.8707	94.0063	0
CLS01088	SBP	glnP	SP_1241	4.08223	ABT	ABT	99.8613	99.0291	97.5035	69.2308
CLS01089	COG	glnQ1	SP_1242	0.158137	non-ABT	non-ABT	99.5935	97.9675	96.3415	80.8943
CLS01090	COG	zwf	SP_1243	0.652728	non-ABT	non-ABT	98.7879	98.9899	97.3737	0
CLS01092	COG	-	SP_1245	0.407413	non-ABT	non-ABT	98.5294	96.6912	96.6912	0
CLS01093	COG	ybjI	SP_1246	0.268755	non-ABT	non-ABT	98.8636	93.5606	94.3182	0
CLS01094	COG	smc	SP_1247	2.21905	non-ABT	non-ABT	97.4555	96.0984	96.8617	58.0236
CLS01095	COG	rnc	SP_1248	0.000291689	non-ABT	non-ABT	98.2759	98.7069	98.7069	68.5345
CLS01096	COG	guaC	SP_1249	0.370767	non-ABT	non-ABT	99.3902	98.7805	98.1707	0
CLS01097	COG	-	SP_1250	0	non-ABT	non-ABT	96.1969	82.1918	0	62.0767
CLS01098	COG	mcrB	SP_1251	0.24575	non-ABT	non-ABT	95.1334	51.1019	0	45.0517
CLS01099	COG	-	SP_1252	0.0788929	non-ABT	non-ABT	100	0	0	0
CLS01100	COG	-	SP_1253	0.365318	non-ABT	non-ABT	0	14.8855	14.8855	0
CLS01101	COG	-	SP_1254	0.0245503	non-ABT	non-ABT	0	0	0	0
CLS01102	COG	leuD	SP_1255	0.00618349	non-ABT	non-ABT	96.6387	55.8376	55.8376	46.1929
CLS01103	COG	-	SP_1256	0.029139	non-ABT	non-ABT	96.6292	89.8876	91.0112	0
CLS01104	COG	leuB	SP_1257	0.428871	non-ABT	non-ABT	97.6812	94.2029	93.913	76.2319
CLS01105	COG	-	-	0.22551	-	non-ABT	99.2806	0	0	0
CLS01106	COG	leuA	SP_1258	0.291037	non-ABT	non-ABT	98.0952	36.9231	37.5	31.6699
CLS01107	COG	mmcQ	SP_1259	0.0309747	non-ABT	non-ABT	99.0826	90.367	89.4495	0
CLS01108	COG	cutC	SP_1260	0.00776358	non-ABT	non-ABT	99.0476	95.2381	94.2857	0
CLS01109	COG	ybaN	SP_1261	0.03053	non-ABT	non-ABT	99.1597	97.479	96.6387	0
CLS01110	COG	topA	SP_1263	0.0184496	non-ABT	non-ABT	99.7122	98.5612	97.9856	78.7234
CLS01111	COG	-	SP_1264	0.47937	non-ABT	non-ABT	99.7118	97.6945	48.0114	0
CLS01112	COG	dprA	SP_1266	0.0748478	non-ABT	non-ABT	100	98.227	98.9362	62.766
CLS01113	COG	licC	SP_1267	0.79972	non-ABT	non-ABT	99.5633	99.1266	99.1266	0
CLS01115	COG	pck	SP_1269	0.732081	non-ABT	non-ABT	98.9619	94.4637	93.7716	0
CLS01116	COG	idnD	SP_1270	0.583049	non-ABT	non-ABT	99.7059	98.8235	98.2353	0
CLS01117	COG	ispD	SP_1271	0.682641	non-ABT	non-ABT	100	97.0213	97.0213	0
CLS01119	COG	licD1	SP_1273	0.400351	non-ABT	non-ABT	99.2509	97.3783	97.3783	0
CLS01120	COG	licD2	SP_1274	0.000847149	non-ABT	non-ABT	85.8736	97.026	97.3978	0
CLS01121	COG	carB	SP_1275	1.18539	non-ABT	non-ABT	99.811	98.0151	97.9206	87.8187
CLS01122	COG	carA	SP_1276	0	non-ABT	non-ABT	100	99.4429	98.8858	83.9779
CLS01123	COG	pyrB	SP_1277	0.81855	non-ABT	non-ABT	99.3485	98.6971	98.3713	66.4516
CLS01124	COG	pyrR	SP_1278	0.603318	non-ABT	non-ABT	100	98.2659	97.6879	75.5682
CLS01125	COG	nth	SP_1279	0.394365	non-ABT	non-ABT	100	98.5646	98.0861	73.2057
CLS01126	COG	-	SP_1280	1.16083	non-ABT	non-ABT	96.1111	95	93.8889	0
CLS01127	COG	-	SP_1282	0.671007	non-ABT	non-ABT	98.0732	93.0636	93.4489	0
CLS01128	COG	htpX	SP_1283	0	non-ABT	non-ABT	98.9967	97.6589	98.3278	73.5786
CLS01129	COG	lemA	SP_1284	0.482092	non-ABT	non-ABT	100	98.9247	99.4624	74.8663
CLS01130	COG	gidB	SP_1285	0.218105	non-ABT	non-ABT	99.5781	96.6245	95.7806	74.2616
CLS01131	COG	uraA	SP_1286	0.109002	non-ABT	non-ABT	96.8109	95.672	93.8497	0
CLS01132	COG	ffh	SP_1287	1.0793	ABT	non-ABT	99.8088	99.6176	99.6176	86.0421
CLS01133	COG	-	SP_1288	0.00762688	non-ABT	non-ABT	99.0909	100	100	86.3636
CLS01134	COG	-	SP_1289	0.142978	non-ABT	non-ABT	97.6	96	95.2	0
CLS01135	COG	-	SP_1290	0.777407	non-ABT	non-ABT	98.6175	97.6959	98.1567	73.0415
CLS01136	COG	-	SP_1291	0.503477	non-ABT	non-ABT	98.8806	97.3881	98.1343	75.0929
CLS01137	COG	rplS	SP_1293	0.38385	non-ABT	non-ABT	99.1304	100	100	88.6957
CLS01138	COG	crcB1	SP_1294	0	non-ABT	non-ABT	96.3303	91.7431	95.4128	0
CLS01139	COG	crcB2	SP_1295	0.303712	non-ABT	non-ABT	100	96.7742	91.129	0
CLS01140	COG	-	SP_1296	0	non-ABT	non-ABT	98.8636	94.3182	95.4545	0
CLS01141	COG	flaV	SP_1297	0.070622	non-ABT	non-ABT	99.3197	97.9592	99.3197	76.1905
CLS01142	COG	nrnA	SP_1298	0.585687	non-ABT	non-ABT	99.6785	95.4984	95.1768	67.5241
CLS01143	COG	rpmE	SP_1299	0	non-ABT	non-ABT	85.1064	84.0426	85.1064	81.9149
CLS01144	COG	-	SP_1300	0.232742	non-ABT	non-ABT	0	0	0	0
CLS01145	COG	gdh	SP_1306	0	non-ABT	non-ABT	98.8839	98.8839	94.1964	64.9667
CLS01146	COG	-	-	0.125798	-	non-ABT	0	0	0	0
CLS01147	COG	-	-	0.346478	-	non-ABT	0	0	0	0
CLS01148	COG	-	-	0.165404	-	non-ABT	76.8421	0	0	0
CLS01149	COG	-	SP_1315	0	non-ABT	non-ABT	0	0	99.0148	0
CLS01150	COG	-	SP_1316	0	non-ABT	non-ABT	0	0	99.7831	0
CLS01151	COG	ntpA	SP_1317	0	non-ABT	non-ABT	0	0	98.8156	0
CLS01152	COG	ntpF	SP_1318	0.0809849	non-ABT	non-ABT	0	0	99.0566	0
CLS01153	COG	ntpC	SP_1319	0.965894	non-ABT	non-ABT	0	0	97.0149	0
CLS01154	COG	ntpE	SP_1320	0	non-ABT	non-ABT	0	0	97.4093	0
CLS01155	COG	ntpK	SP_1321	0.22976	non-ABT	non-ABT	0	0	99.3671	0
CLS01156	COG	ntpI	SP_1322	0.884251	non-ABT	non-ABT	0	0	96.2293	0
CLS01157	COG	-	SP_1323	0	non-ABT	non-ABT	0	0	96.2617	0
CLS01158	COG	-	SP_1324	0.325765	non-ABT	non-ABT	0	0	96.2838	0
CLS01159	COG	afr	SP_1686	0.597109	non-ABT	non-ABT	99.7275	99.455	69.9187	0
CLS01160	Degradative	nanC	SP_1326	3.53114	non-ABT	ABT	0	0	0	0
CLS01161	COG	-	SP_1327	0	non-ABT	non-ABT	0	0	98.0263	0
CLS01162	COG	-	SP_1328	0.139707	non-ABT	non-ABT	0	0	96.8811	0
CLS01163	COG	nanH	SP_1676	0.665274	ABT	non-ABT	77.0492	99.0164	98.6885	0
CLS01164	COG	nanE2	SP_1685	0.284235	non-ABT	non-ABT	100	99.1379	97.8448	0
CLS01165	COG	-	SP_1331	0.749174	non-ABT	non-ABT	0	0	96.2825	0
CLS01166	COG	-	SP_1346	0.504579	non-ABT	non-ABT	94.359	0	91.7949	0
CLS01167	COG	-	SP_1347	0.180598	non-ABT	non-ABT	0	0	97.4026	0
CLS01168	COG	-	SP_1348	0.121036	non-ABT	non-ABT	96.8254	0	92.0635	0
CLS01169	COG	-	SP_1349	0.0162997	non-ABT	non-ABT	62.6168	0	53.0201	0
CLS01170	COG	-	SP_1350	0.766885	non-ABT	non-ABT	100	0	26.2548	0
CLS01171	COG	-	SP_1351	1.15927	non-ABT	non-ABT	0	0	0	0
CLS01172	COG	rplL	SP_1354	0.326729	non-ABT	non-ABT	100	99.1803	99.1803	82.7869
CLS01173	COG	rplJ	SP_1355	0.376348	non-ABT	non-ABT	100	100	96.988	85.6287
CLS01174	COG	trzA	SP_1356	0.204695	non-ABT	non-ABT	98.9754	83.1967	58.4016	0
CLS01175	COG	-	SP_1357	0.120009	non-ABT	non-ABT	98.4563	93.9863	92.6117	64.6655
CLS01176	COG	bmrA	SP_1358	0.232777	non-ABT	non-ABT	95.993	95.8188	94.9477	56.8458
CLS01177	COG	msrAB1	SP_1359	1.12136	non-ABT	non-ABT	99.6795	100	94.8718	0
CLS01178	COG	thrB	SP_1360	0	non-ABT	non-ABT	100	98.2699	96.5398	67.128
CLS01179	COG	hom	SP_1361	0	non-ABT	non-ABT	99.5327	97.6636	97.6636	73.1308
CLS01180	COG	mecA	SP_1362	1.24613	non-ABT	non-ABT	99.1837	98.7755	98.7755	48.1633
CLS01181	COG	-	SP_1363	1.01982	non-ABT	non-ABT	99.4186	96.5116	95.3488	0
CLS01182	COG	-	SP_1364	0.0382532	non-ABT	non-ABT	99.5807	96.5235	95.092	0
CLS01183	COG	hyaD	SP_1365	0.644376	non-ABT	non-ABT	99.0854	98.4756	97.2561	0
CLS01184	COG	cotSA	SP_1366	0.74942	non-ABT	non-ABT	99.455	98.3651	95.3678	0
CLS01185	COG	licD3	SP_1367	0	non-ABT	non-ABT	97.5089	95.3737	94.6619	0
CLS01186	CellWall	msrR	SP_1368	2.31195	non-ABT	ABT	99.7642	99.2925	83.4862	49.3562
CLS01187	COG	pheA	SP_1369	0.64249	non-ABT	non-ABT	99.2908	98.9362	96.8085	64.1844
CLS01188	COG	aroK	SP_1370	0.371531	non-ABT	non-ABT	98.7342	96.2025	91.7722	58.2278
CLS01189	COG	aroA	SP_1371	0.383821	non-ABT	non-ABT	98.1265	95.7845	95.3162	76.5808
CLS01190	COG	-	SP_1372	0.0149745	non-ABT	non-ABT	100	97.3214	94.6429	0
CLS01191	COG	tyrA	SP_1373	0.559585	non-ABT	non-ABT	99.7275	96.4578	96.1853	70.6522
CLS01192	COG	aroC	SP_1374	0.703688	ABT	non-ABT	99.7423	97.4227	98.1959	80.9278
CLS01193	COG	aroB	SP_1375	0.312562	non-ABT	non-ABT	99.4366	97.4648	96.6197	75.2113
CLS01194	COG	aroE	SP_1376	0.266821	non-ABT	non-ABT	98.9437	95.0704	95.7746	56.7474
CLS01195	COG	aroD	SP_1377	0.0681067	non-ABT	non-ABT	99.5556	98.6667	98.6667	68
CLS01196	COG	rlmI	SP_1378	0	ABT	non-ABT	97.1795	95.641	92.8205	55.3488
CLS01197	COG	-	SP_1380	0.112419	non-ABT	non-ABT	95.0368	93.5662	87.8676	0
CLS01198	COG	-	SP_1381	0.251487	non-ABT	non-ABT	99.1968	97.1888	95.9839	59.761
CLS01199	COG	amy	SP_1382	0.201825	non-ABT	non-ABT	98.9669	95.0413	95.4545	60.5749
CLS01200	COG	alaS	SP_1383	0	non-ABT	non-ABT	98.8532	99.1972	98.1651	80.1606
CLS01201	COG	-	SP_1384	0.410137	non-ABT	non-ABT	98.7578	95.0311	96.2733	0
CLS01202	COG	potD	SP_1386	0.871158	non-ABT	non-ABT	98.3146	96.0674	96.0674	66.3866
CLS01203	COG	potC	SP_1387	0	non-ABT	non-ABT	100	97.6654	97.2763	77.1318
CLS01204	COG	potB	SP_1388	0.33661	non-ABT	non-ABT	100	100	100	74.2537
CLS01205	COG	potA	SP_1389	0.800792	non-ABT	non-ABT	99.7403	99.4805	99.2208	87.2727
CLS01206	COG	murB	SP_1390	0.196026	non-ABT	non-ABT	94.6203	98.6711	98.3389	71.3355
CLS01207	COG	-	SP_1391	0	non-ABT	non-ABT	66.8	64.4	64	0
CLS01208	COG	aldB	SP_1392	0.661668	non-ABT	non-ABT	100	97.7578	96.861	76.4706
CLS01209	COG	yjiR	SP_1393	0.146216	non-ABT	non-ABT	98.818	94.5626	93.1442	49.7674
CLS01210	SBP	glnH	SP_1394	3.01964	non-ABT	ABT	99.262	100	96.679	52.1898
CLS01211	COG	phoU1	SP_1395	0.0899909	non-ABT	non-ABT	100	99.5392	90.3226	69.1244
CLS01212	COG	pstB1	SP_1396	0.25959	non-ABT	non-ABT	100	98.8095	94.8413	83.3333
CLS01213	COG	pstB2	SP_1397	0	non-ABT	non-ABT	99.2509	99.6255	94.7566	86.5169
CLS01214	COG	pstA	SP_1398	0	non-ABT	non-ABT	99.6599	99.3197	96.2585	86.4407
CLS01215	COG	pstC	SP_1399	0.679099	non-ABT	non-ABT	100	100	94.4262	80.1282
CLS01216	SBP	pstS2	SP_1400	3.4857	non-ABT	ABT	100	99.6575	82.8767	64.0411
CLS01217	COG	rsmF	SP_1402	0.515227	non-ABT	non-ABT	99.7696	97.9263	94.7005	64.9083
CLS01218	COG	suhB	SP_1403	0.450562	non-ABT	non-ABT	99.2218	77.4319	94.1634	51.3619
CLS01219	COG	-	SP_1404	0	non-ABT	non-ABT	100	100	97.8261	0
CLS01220	COG	-	SP_1405	0.30358	non-ABT	non-ABT	100	100	99.2481	54.7445
CLS01221	COG	-	SP_1406	0.090451	non-ABT	non-ABT	99.5122	93.1707	88.2927	0
CLS01222	COG	yutF	SP_1407	0.46005	non-ABT	non-ABT	99.6109	97.2763	97.2763	73.93
CLS01223	COG	-	SP_1408	0.739322	non-ABT	non-ABT	97.9592	94.2857	93.8776	0
CLS01224	COG	hemN	SP_1409	0.416177	non-ABT	non-ABT	100	96.0106	96.8085	71.5789
CLS01225	COG	-	SP_1410	0.0855695	non-ABT	non-ABT	99.2248	90.0763	93.7984	0
CLS01226	COG	-	SP_1411	0.183873	non-ABT	non-ABT	100	96.8504	99.2126	0
CLS01227	COG	lgt	SP_1412	0.263807	non-ABT	non-ABT	99.6183	97.3282	96.9466	66.1597
CLS01228	COG	hprK	SP_1413	0.879918	non-ABT	non-ABT	99.6785	98.0707	90.2516	76.2058
CLS01229	COG	rpsU	SP_1414	0	non-ABT	non-ABT	100	98.2759	98.2759	94.8276
CLS01230	COG	nagB	SP_1415	0.196028	non-ABT	non-ABT	99.5745	97.0213	97.8723	62.5532
CLS01231	COG	queA	SP_1416	0.095292	non-ABT	non-ABT	97.9769	98.2659	97.1098	78.0347
CLS01232	COG	-	SP_1419	0.31155	non-ABT	non-ABT	97.8142	48.6339	86.3388	0
CLS01233	COG	nadE	SP_1420	0.213568	non-ABT	non-ABT	100	96.3504	97.8102	78.8321
CLS01234	COG	pncB	SP_1421	0.357776	non-ABT	non-ABT	100	97.1193	97.1193	81.07
CLS01235	COG	-	SP_1422	0.322791	non-ABT	non-ABT	98.7654	85.1852	82.0988	0
CLS01236	COG	-	SP_1423	0.0710795	non-ABT	non-ABT	100	97.1014	97.1014	0
CLS01237	COG	-	SP_1424	0.209091	non-ABT	non-ABT	65.2893	65.7025	0	0
CLS01238	COG	-	SP_1426	0.278091	non-ABT	non-ABT	63.1799	53.7367	0	0
CLS01239	COG	-	SP_1429	0.15776	ABT	non-ABT	55.6075	25.7261	54.6729	46.4953
CLS01240	COG	-	SP_1430	0.212689	non-ABT	non-ABT	98.3333	0	0	0
CLS01241	COG	-	-	0.0150801	-	non-ABT	100	0	0	0
CLS01242	COG	-	SP_1431	0	non-ABT	non-ABT	99.7449	72.9798	0	0
CLS01243	COG	soxS	SP_1433	0.476777	non-ABT	non-ABT	100	0	0	0
CLS01244	COG	irtA	SP_1434	0	non-ABT	non-ABT	99.3174	0	0	0
CLS01245	COG	ndvA	SP_1435	0.349128	non-ABT	non-ABT	99.8255	0	31.2698	0
CLS01246	COG	-	SP_1436	0.295639	non-ABT	non-ABT	100	0	0	0
CLS01247	COG	-	SP_1437	0.533212	non-ABT	non-ABT	100	0	0	0
CLS01248	COG	-	SP_1440	0.134264	non-ABT	non-ABT	100	0	0	0
CLS01249	COG	guaA	SP_1445	0.426432	non-ABT	non-ABT	99.8077	98.8462	99.0385	82.7255
CLS01250	COG	-	SP_1446	0.308022	non-ABT	non-ABT	97.4468	95.7447	96.1702	70.6383
CLS01251	COG	-	SP_1447	0	non-ABT	non-ABT	98.9933	94.2953	96.3087	55.1948
CLS01252	COG	-	SP_1448	0.173288	non-ABT	non-ABT	99.6795	93.2476	91.6399	53.75
CLS01253	COG	cppA	SP_1449	0.964582	non-ABT	non-ABT	99.1701	96.6805	93.361	0
CLS01254	COG	-	SP_1450	0.260035	non-ABT	non-ABT	99.0521	50.237	90.0474	0
CLS01255	COG	supH	SP_1451	0.109077	non-ABT	non-ABT	100	92.7273	94.1818	0
CLS01256	COG	-	SP_1454	2.03621	non-ABT	non-ABT	100	37.5854	36.2187	24.3655
CLS01257	COG	def1	SP_1456	0.159707	non-ABT	non-ABT	100	100	99.0148	73.0392
CLS01258	COG	-	SP_1457	0.208139	non-ABT	non-ABT	99.5868	99.5868	98.3471	75
CLS01259	COG	trxB	SP_1458	0.11179	non-ABT	non-ABT	99.0099	99.3399	98.0198	77.3026
CLS01260	COG	-	SP_1459	0	non-ABT	non-ABT	98.6486	98.6486	98.6486	0
CLS01261	COG	tcyN	SP_1460	0.0568427	non-ABT	non-ABT	99.5951	98.7854	99.1903	82.996
CLS01262	COG	yxeN	SP_1461	0.238277	non-ABT	non-ABT	100	99.6241	100	73.8806
CLS01263	COG	-	SP_1462	0.227658	non-ABT	non-ABT	100	98.3051	97.4576	0
CLS01264	COG	ogt	SP_1463	0.255974	non-ABT	non-ABT	95.4545	98.2353	90.6977	0
CLS01265	COG	-	SP_1464	0.381538	non-ABT	non-ABT	99.3902	95.7317	95.7317	0
CLS01267	COG	-	SP_1465	0	non-ABT	non-ABT	100	95.2703	93.9189	0
CLS01268	COG	yqfA	SP_1466	0.0543734	non-ABT	non-ABT	100	97.6744	98.1395	77.0642
CLS01269	COG	pdxT	SP_1467	0.094902	non-ABT	non-ABT	99.4819	90.6736	92.228	0
CLS01270	COG	pdx1	SP_1468	0.554808	non-ABT	non-ABT	100	99.6564	99.3127	0
CLS01271	COG	nox	SP_1469	1.07307	non-ABT	non-ABT	100	98.0392	97.6035	74.5098
CLS01272	COG	apbE	SP_1470	0.637344	non-ABT	non-ABT	100	32.2476	95.4397	50.4792
CLS01273	COG	-	SP_1471	0.602176	non-ABT	non-ABT	100	0	97.0149	84.0796
CLS01274	COG	-	SP_1472	1.45941	non-ABT	non-ABT	98.7923	0	91.5663	80.1865
CLS01275	COG	ynzC	SP_1473	0	non-ABT	non-ABT	100	95.2941	98.8235	0
CLS01276	COG	glyS	SP_1474	0.993283	non-ABT	non-ABT	99.41	94.3953	95.4277	68.6303
CLS01277	COG	glyQ	SP_1475	0.469302	non-ABT	non-ABT	99.3443	99.0164	99.6721	92.7869
CLS01278	COG	-	-	0.460188	-	non-ABT	0	96.4427	0	0
CLS01279	COG	yvgN	SP_1478	0.644547	ABT	non-ABT	98.9286	92.1429	0	55.9441
CLS01280	CellWall	pgdA	SP_1479	2.3802	non-ABT	ABT	98.9583	90.625	73.3333	0
CLS01281	COG	mocA	SP_1482	0.398427	non-ABT	non-ABT	95.549	88.4273	87.8338	56.213
CLS01282	COG	-	SP_1483	0.342028	non-ABT	non-ABT	99.4444	96.6667	96.3889	65.5556
CLS01283	COG	tuf	SP_1489	0.150858	non-ABT	non-ABT	100	100	99.4975	94.2211
CLS01284	COG	gla	SP_1491	0.222708	non-ABT	non-ABT	98.9619	96.5398	82.7815	67.354
CLS01285	COG	inlJ	SP_1493	0.00243304	non-ABT	non-ABT	99.4565	25.8974	10.6745	0
CLS01286	COG	-	SP_1496	0.162468	non-ABT	non-ABT	98.9899	71.7172	0	0
CLS01287	COG	pgmA	SP_1498	0.244106	non-ABT	non-ABT	100	98.6014	98.0769	82.6923
CLS01288	COG	bta	SP_1499	0	non-ABT	non-ABT	99.1304	94.7826	93.0435	0
CLS01289	SBP	aatB	SP_1500	3.53086	non-ABT	ABT	99.6403	98.2014	68.5714	61.4286
CLS01290	COG	-	SP_1501	0.334202	non-ABT	non-ABT	99.0431	97.1292	93.3014	70.3349
CLS01291	COG	-	SP_1502	0	non-ABT	non-ABT	100	99.5305	93.8967	73.2394
CLS01292	COG	-	SP_1504	0.466856	non-ABT	non-ABT	98.7775	95.11	95.11	56.5854
CLS01293	COG	-	SP_1505	0.177378	non-ABT	non-ABT	100	98.9691	96.134	55.7841
CLS01294	COG	ybhE	SP_1506	0.058556	non-ABT	non-ABT	99.7033	96.1424	94.0653	0
CLS01295	COG	atpC	SP_1507	0.276344	non-ABT	non-ABT	100	99.2806	97.1223	65.4676
CLS01296	COG	atpD	SP_1508	0.644356	non-ABT	non-ABT	99.7863	99.5726	99.5726	90.812
CLS01297	COG	atpG	SP_1509	0.252873	non-ABT	non-ABT	99.6575	98.9726	98.2877	68.4932
CLS01298	COG	atpA	SP_1510	0.230284	non-ABT	non-ABT	99.8004	99.002	98.8024	85.0299
CLS01299	COG	atpH	SP_1511	0.21603	non-ABT	non-ABT	100	93.8202	94.9438	0
CLS01300	COG	atpF	SP_1512	0.538424	non-ABT	non-ABT	100	93.2927	95.7317	0
CLS01301	COG	atpB	SP_1513	0.12097	non-ABT	non-ABT	100	100	78.9916	0
CLS01302	COG	atpE	SP_1514	0	non-ABT	non-ABT	100	98.4848	87.8788	0
CLS01303	COG	-	SP_1516	0.552818	non-ABT	non-ABT	99.2958	87.3239	88.0282	0
CLS01304	COG	greA	SP_1517	0.102703	non-ABT	non-ABT	100	100	82.5	79.375
CLS01305	CellWall	mltG	SP_1518	3.03741	ABT	ABT	99.0926	92.9856	74.2504	39.4737
CLS01306	COG	-	SP_1519	0.201738	non-ABT	non-ABT	100	93.2927	80.5405	0
CLS01307	COG	-	SP_1520	0.138236	non-ABT	non-ABT	99.3506	90.2597	88.3117	0
CLS01308	COG	murC	SP_1521	0.619442	non-ABT	non-ABT	99.5495	98.6486	98.6486	78.6517
CLS01309	COG	-	SP_1522	0.033063	ABT	non-ABT	99.5122	95.122	81.9512	0
CLS01310	COG	snf	SP_1523	0.687721	non-ABT	non-ABT	98.8372	96.7054	95.2519	50.9179
CLS01311	COG	metC	SP_1524	0.413541	non-ABT	non-ABT	99.7423	98.7113	95.1031	56.1856
CLS01312	COG	metB	SP_1525	0.423805	non-ABT	non-ABT	99.4505	98.9011	98.3516	69.7802
CLS01313	COG	lmrA	SP_1526	0	non-ABT	non-ABT	59.5833	0	0	0
CLS01314	SBP	aliB	SP_1527	4.27996	ABT	ABT	99.6933	86.5031	76.6871	0
CLS01315	COG	ytgP	SP_1529	0.361247	non-ABT	non-ABT	100	95.1852	94.2593	57.0384
CLS01317	COG	-	SP_1531	0.0260311	non-ABT	non-ABT	93.75	90.7692	0	0
CLS01318	COG	-	-	0.166392	-	non-ABT	48.9899	93.4343	83.3333	48.3871
CLS01319	COG	murE2	SP_1533	0.290236	non-ABT	non-ABT	99.4118	89.4118	87.0588	0
CLS01320	COG	ppx1	SP_1534	0.531055	non-ABT	non-ABT	100	98.0707	98.7138	80.3859
CLS01321	COG	-	SP_1535	0.0639047	non-ABT	non-ABT	98.9899	86.8687	86.8687	0
CLS01323	COG	yugI	SP_1537	0.451669	non-ABT	non-ABT	100	94.1176	90.8333	59.6899
CLS01324	COG	-	SP_1538	0.403843	non-ABT	non-ABT	99.3562	96.1373	96.5665	62.4204
CLS01325	COG	rpsR	SP_1539	0.0484505	non-ABT	non-ABT	100	100	100	100
CLS01326	COG	ssbA	SP_1540	0.31417	non-ABT	non-ABT	99.359	97.4359	98.7179	72.561
CLS01327	COG	rpsF	SP_1541	0.389034	non-ABT	non-ABT	100	97.9167	96.875	86.4583
CLS01328	COG	asnS	SP_1542	0.31737	non-ABT	non-ABT	99.5526	98.8814	99.5526	79.6875
CLS01329	COG	-	SP_1543	0.859754	non-ABT	non-ABT	97.5207	90.9091	92.562	0
CLS01330	COG	aspC	SP_1544	0.308565	non-ABT	non-ABT	99.7468	97.7215	97.9747	74.4949
CLS01331	COG	ypmB	SP_1545	1.02699	non-ABT	non-ABT	98.6014	95.1049	95.8042	0
CLS01332	COG	-	SP_1546	0.00513877	non-ABT	non-ABT	99.4505	95.6044	94.5055	0
CLS01333	Adhesin	pclA	-	2.83774	-	ABT	0	0	0	0
CLS01334	COG	mga2	-	0.249129	-	non-ABT	99.7976	0	89.0688	0
CLS01335	COG	yaaA	SP_1547	0.685778	non-ABT	non-ABT	100	93.8017	94.2149	0
CLS01336	COG	-	-	0.000448878	-	non-ABT	96.2963	0	98.1481	0
CLS01337	COG	-	SP_1548	0.829961	non-ABT	non-ABT	99.6234	98.8701	96.4218	0
CLS01338	COG	def2	SP_1549	0	non-ABT	non-ABT	99.2647	93.3824	93.3824	0
CLS01339	COG	yghU	SP_1550	0.662154	non-ABT	non-ABT	99.6198	98.1132	0	69.5817
CLS01340	COG	pacL	SP_1551	0.467731	non-ABT	non-ABT	99.5546	98.6637	97.5501	71.9376
CLS01341	COG	mntE	SP_1552	0.121429	non-ABT	non-ABT	99.2386	96.9543	96.7005	61.5
CLS01342	COG	-	SP_1553	0.690808	non-ABT	non-ABT	98.3949	97.1108	96.6292	73.1942
CLS01343	COG	cca	SP_1554	0.413658	non-ABT	non-ABT	97.7444	93.4837	92.7318	63.8404
CLS01344	COG	dapB	SP_1555	0.215221	non-ABT	non-ABT	99.2157	96.0784	96.4706	74.5098
CLS01345	COG	-	SP_1557	0.502765	non-ABT	non-ABT	98.9362	95.0355	93.2624	60.6383
CLS01346	COG	-	SP_1558	0	non-ABT	non-ABT	99.1935	97.5806	51.6129	0
CLS01347	COG	glmM	SP_1559	0.297526	non-ABT	non-ABT	99.5556	98	96.6667	83.7778
CLS01348	COG	-	SP_1560	3.65033	non-ABT	ABT	100	96.139	83.0116	0
CLS01349	COG	-	SP_1561	0.285122	non-ABT	non-ABT	100	99.2982	88.0702	57.3427
CLS01350	COG	yumC	SP_1563	0.51594	non-ABT	non-ABT	99.0683	97.205	96.8944	55.1205
CLS01351	COG	whiA	SP_1564	0.467569	non-ABT	non-ABT	99.3399	98.6799	98.3498	66.0066
CLS01352	COG	-	SP_1565	0.142271	non-ABT	non-ABT	99.6923	96.6154	96.9231	77.6074
CLS01353	COG	yvcJ	SP_1566	0.398349	non-ABT	non-ABT	98.9865	97.2973	95.9459	75.3378
CLS01354	COG	tdcF	SP_1567	0	non-ABT	non-ABT	100	99.2063	98.4127	82.5397
CLS01355	COG	engB	SP_1568	0.535382	non-ABT	non-ABT	100	98.9744	98.4615	82.7411
CLS01356	COG	clpX	SP_1569	0.347744	non-ABT	non-ABT	99.7561	97.0732	97.0732	86.3747
CLS01357	COG	-	SP_1570	0	non-ABT	non-ABT	100	87.5	87.5	0
CLS01358	COG	dyr	SP_1571	0	non-ABT	non-ABT	97.0238	92.8571	92.8571	0
CLS01359	COG	dpr	SP_1572	1.02378	non-ABT	non-ABT	99.4186	91.8605	91.8605	57.7143
CLS01360	CellWall	lytC	SP_1573	4.86942	ABT	ABT	99.2016	88.5827	72.2015	0
CLS01361	COG	tpi	SP_1574	0.0929597	non-ABT	non-ABT	100	99.2063	99.2063	66.2698
CLS01362	COG	dnaD	SP_1575	0.151589	non-ABT	non-ABT	98.6667	97.3333	96.4444	57.5107
CLS01363	COG	metA	SP_1576	0.75643	non-ABT	non-ABT	100	96.8153	98.0892	67.8344
CLS01364	COG	apt	SP_1577	0.327103	non-ABT	non-ABT	100	98.8235	98.8235	78.2609
CLS01365	COG	rebM	SP_1578	0.103477	non-ABT	non-ABT	99.2063	0	94.8413	53.7255
CLS01366	COG	msmK	SP_1580	0.597215	non-ABT	non-ABT	99.734	99.2021	99.2021	75.5968
CLS01367	COG	-	SP_1583	0.709774	non-ABT	non-ABT	100	99.4764	97.9058	72.7749
CLS01368	COG	codY	SP_1584	0.758172	non-ABT	non-ABT	99.6183	99.2366	95.8015	71.8631
CLS01369	COG	-	SP_1586	0.501743	non-ABT	non-ABT	99.8092	95.8333	95.9924	80.7183
CLS01370	COG	yhjX	SP_1587	0.314965	non-ABT	non-ABT	99.5098	98.5294	0	0
CLS01371	COG	lpd	SP_1588	0.323015	non-ABT	non-ABT	79.2237	98.4018	98.1735	0
CLS01372	COG	-	SP_1589	0.664622	non-ABT	non-ABT	100	97.7629	97.0917	73.1544
CLS01373	COG	-	SP_1590	0.401957	non-ABT	non-ABT	99.6154	98.4615	97.6923	75.5725
CLS01374	COG	pepQ	SP_1591	1.05284	non-ABT	non-ABT	99.4444	99.4444	99.1667	69.5291
CLS01375	COG	-	SP_1592	0.327196	non-ABT	non-ABT	0	0	0	0
CLS01376	COG	hmpT	SP_1597	0.208942	non-ABT	non-ABT	98.6928	98.6928	98.0392	0
CLS01377	COG	pdxK	SP_1598	0.482734	non-ABT	non-ABT	99.6109	96.8872	97.2763	60.3113
CLS01378	COG	truA	SP_1599	0.325689	non-ABT	non-ABT	100	96.3855	97.1888	72.6908
CLS01379	COG	-	SP_1600	0.211608	non-ABT	non-ABT	99.7389	98.1723	93.9948	0
CLS01380	COG	-	SP_1601	0.37292	non-ABT	non-ABT	100	98.0861	93.3014	0
CLS01381	COG	phnA	SP_1602	0	non-ABT	non-ABT	100	98.2143	96.4286	86.6071
CLS01382	COG	cmk	SP_1603	0.0577196	non-ABT	non-ABT	100	97.7578	96.4444	65.1982
CLS01383	COG	-	SP_1604	4.6958	ABT	ABT	99.3671	98.7342	80.1242	0
CLS01384	COG	-	SP_1605	0.128111	non-ABT	non-ABT	100	0	94.2857	0
CLS01385	COG	gtrB	SP_1606	0.190769	non-ABT	non-ABT	97.2477	88.0734	92.3547	0
CLS01386	COG	galE2	SP_1607	0.652086	non-ABT	non-ABT	99.705	96.7552	98.8201	61.0619
CLS01387	COG	thiO	SP_1608	0.715137	non-ABT	non-ABT	94.8229	92.6431	61.3079	57.9946
CLS01388	COG	-	SP_1609	0	non-ABT	non-ABT	99.6226	90.1887	92.8302	63.5338
CLS01389	COG	trmK	SP_1610	0.40067	non-ABT	non-ABT	99.1111	95.1111	95.1111	53.2189
CLS01390	COG	ctpE	SP_1623	1.00352	non-ABT	non-ABT	99.6144	97.9434	97.8149	0
CLS01391	COG	plsC	SP_1624	0.218101	non-ABT	non-ABT	100	99.1968	97.5904	61.1111
CLS01392	COG	-	SP_1625	0.108464	non-ABT	non-ABT	100	97.549	0	0
CLS01393	COG	rpsO	SP_1626	2.86989	non-ABT	ABT	100	100	100	92.1348
CLS01394	COG	-	SP_1627	1.31595	non-ABT	non-ABT	98.0861	0	0	0
CLS01395	COG	-	SP_1630	0.234217	non-ABT	non-ABT	98.2759	50.4673	0	0
CLS01396	COG	thrS	SP_1631	0.40813	non-ABT	non-ABT	97.4242	96.5152	95.7576	82.7795
CLS01397	COG	graS	SP_1632	0.219991	non-ABT	non-ABT	99.3827	95.3704	96.9136	0
CLS01398	COG	graR	SP_1633	0.0046213	non-ABT	non-ABT	99.5556	99.1111	99.5556	0
CLS01399	COG	-	SP_1634	0.84117	non-ABT	non-ABT	98.8796	91.0364	89.3557	0
CLS01400	COG	ywnA	SP_1636	0	non-ABT	non-ABT	100	95.8621	95.8621	0
CLS01401	COG	-	SP_1637	0.237401	non-ABT	non-ABT	99.2857	97.5	96.0714	0
CLS01402	COG	psaR	SP_1638	0.603846	non-ABT	non-ABT	100	95.3704	96.7593	58.0645
CLS01403	COG	-	SP_1640	0.162989	non-ABT	non-ABT	63.2124	0	0	0
CLS01404	COG	-	SP_1641	0.227802	non-ABT	non-ABT	99.3103	0	0	0
CLS01405	COG	-	-	0.11858	-	non-ABT	97.9798	0	0	0
CLS01406	COG	-	-	0.477408	-	non-ABT	0	0	0	0
CLS01407	COG	dtd	SP_1644	0	non-ABT	non-ABT	98.6395	94.5578	96.5986	70.2703
CLS01408	COG	relA	SP_1645	1.01421	non-ABT	non-ABT	99.7297	97.973	97.7027	77.8976
CLS01409	COG	-	SP_1646	0.291965	non-ABT	non-ABT	98.5646	98.5646	72.7273	58.9623
CLS01410	COG	pepO	SP_1647	0.366527	non-ABT	non-ABT	100	98.0952	96.1905	65.2932
CLS01411	COG	psaB	SP_1648	0	non-ABT	non-ABT	95.2191	94.0239	94.0239	59.5238
CLS01412	COG	psaC	SP_1649	0.222903	non-ABT	non-ABT	99.6454	98.9362	99.2908	79.4326
CLS01413	SBP	psaA	SP_1650	4.13193	non-ABT	ABT	100	98.0583	95.7929	71.521
CLS01414	COG	tpx	SP_1651	0.0187966	non-ABT	non-ABT	94.186	93.0233	93.0233	65.1163
CLS01415	COG	-	SP_1652	0.316715	non-ABT	non-ABT	98.8914	93.2373	94.3459	45.2747
CLS01416	COG	-	SP_1653	0.175812	non-ABT	non-ABT	73.3906	71.6738	71.6738	59.6567
CLS01417	COG	-	SP_1654	0.518394	non-ABT	non-ABT	97.8829	0	89.9128	0
CLS01418	COG	gpmA	SP_1655	0.451186	non-ABT	non-ABT	100	100	100	90.4348
CLS01419	COG	-	SP_1656	0.727659	non-ABT	non-ABT	100	0	0	0
CLS01420	COG	-	SP_1658	0.410914	non-ABT	non-ABT	0	0	62.406	0
CLS01421	COG	ileRS	SP_1659	0.662395	non-ABT	non-ABT	99.4624	97.2043	95.8065	77.8495
CLS01422	COG	-	-	0	-	non-ABT	0	0	0	0
CLS01423	COG	divIVA	SP_1661	0.342716	ABT	non-ABT	100	81.9113	74.1497	52.1898
CLS01424	COG	-	SP_1662	0.494433	non-ABT	non-ABT	100	98.0843	75.8621	0
CLS01425	COG	-	SP_1663	0.112053	non-ABT	non-ABT	100	98.8506	72.4138	0
CLS01426	COG	sepF	SP_1664	0.305513	ABT	non-ABT	99.4413	84.5304	77.3481	0
CLS01427	COG	-	SP_1665	0.329759	non-ABT	non-ABT	99.5516	100	86.5471	60.9865
CLS01428	COG	ftsZ	SP_1666	0.772512	non-ABT	non-ABT	100	98.8067	89.9761	76.3218
CLS01429	COG	ftsA	SP_1667	0.968464	non-ABT	non-ABT	100	98.9059	95.6236	67.8186
CLS01430	COG	-	SP_1668	0.0359205	non-ABT	non-ABT	99.5726	97.0085	91.453	0
CLS01431	COG	-	SP_1669	0	non-ABT	non-ABT	96.0591	0	0	0
CLS01432	COG	murF	SP_1670	1.04178	non-ABT	non-ABT	99.1247	94.5295	95.4048	64.6288
CLS01433	COG	ddlA	SP_1671	0.220422	non-ABT	non-ABT	97.6945	97.4063	97.1182	72.4928
CLS01434	COG	recR	SP_1672	0.0197418	non-ABT	non-ABT	99.4949	98.9899	99.4949	84.4221
CLS01435_a1	CellWall	pbp2b	-	4.62343	-	ABT	98.0882	97.9412	95.7353	55.1079
CLS01435_a2	CellWall	pbp2b	-	4.30927	-	ABT	96.9118	98.3824	97.6471	54.5324
CLS01435_a3	CellWall	pbp2b	-	4.09256	-	ABT	97.0588	98.8235	96.6176	54.964
CLS01435_a4	CellWall	pbp2b	-	4.62226	-	ABT	94.1176	93.2353	93.0882	55.3957
CLS01436	COG	-	SP_1674	0.312089	non-ABT	non-ABT	99.2933	98.5866	96.4664	0
CLS01437	COG	-	SP_1675	0.106371	non-ABT	non-ABT	100	96.9388	92.953	0
CLS01438	COG	-	SP_1677	0.0074088	non-ABT	non-ABT	64.9533	93.9252	91.1215	0
CLS01439	COG	-	SP_1679	0.101548	non-ABT	non-ABT	82.4561	50.5051	0	0
CLS01440	COG	-	SP_1680	0.59334	non-ABT	non-ABT	95.3333	94.6667	95.3333	0
CLS01441	COG	-	SP_1681	0.263229	non-ABT	non-ABT	100	99.2832	99.2832	0
CLS01442	COG	-	SP_1682	0.0834327	non-ABT	non-ABT	100	95.2542	94.9153	0
CLS01443	SBP	satA	SP_1683	3.72422	non-ABT	ABT	100	98.4163	93.6652	0
CLS01444	COG	-	SP_1684	0.287331	non-ABT	non-ABT	99.802	96.6337	0	0
CLS01445	Degradative	nanB	SP_1687	2.60408	ABT	ABT	98.8522	98.4218	0	0
CLS01446	COG	-	SP_1688	0.0228543	non-ABT	non-ABT	99.278	98.917	0	0
CLS01447	COG	-	SP_1689	0.163961	non-ABT	non-ABT	99.6599	98.9796	0	0
CLS01448	COG	-	SP_1690	1.50939	non-ABT	non-ABT	100	99.3258	0	0
CLS01449	COG	-	SP_1691	0.0561872	non-ABT	non-ABT	99.3333	97.3333	0	0
CLS01450	Degradative	nanA	SP_1693	3.38475	ABT	ABT	89.0732	50.3993	33.7179	0
CLS01451	COG	-	SP_1694	0.275013	non-ABT	non-ABT	100	98.6667	0	0
CLS01452	COG	cah	SP_1695	0.755032	non-ABT	non-ABT	99.3865	90.184	92.3313	0
CLS01453	COG	recG	SP_1697	0.679126	non-ABT	non-ABT	99.4039	97.4665	97.4665	69.4486
CLS01454	COG	alr	SP_1698	1.099	non-ABT	non-ABT	99.7275	93.733	94.0054	61.7251
CLS01455	COG	acpS	SP_1699	0.401087	non-ABT	non-ABT	100	94.2623	95.082	60.6557
CLS01456	COG	aroF	SP_1700	0.527238	non-ABT	non-ABT	100	98.2507	95.3353	73.8372
CLS01457	COG	aroG	SP_1701	0.911586	non-ABT	non-ABT	99.7085	98.5423	95.9184	81.0496
CLS01458	COG	secA	SP_1702	0.1956	non-ABT	non-ABT	99.6416	99.0442	98.0884	78.9536
CLS01459	COG	-	SP_1703	0.106589	non-ABT	non-ABT	0	85.2632	0	0
CLS01460	COG	-	SP_1704	0.0923626	non-ABT	non-ABT	98.1481	94.4444	0	0
CLS01461	COG	-	SP_1705	0.0669645	non-ABT	non-ABT	98.5915	94.8357	0	0
CLS01462	COG	-	SP_1706	0.283556	non-ABT	non-ABT	98.8593	93.5361	0	0
CLS01463	COG	-	-	0.31487	-	non-ABT	99.2308	0	0	0
CLS01464	COG	-	-	0	-	non-ABT	100	0	0	0
CLS01465	COG	-	SP_1708	0	non-ABT	non-ABT	97.3684	80.7018	78.9474	0
CLS01466	COG	engA	SP_1709	0	non-ABT	non-ABT	100	99.7706	100	86.9266
CLS01467	COG	nfrA2	SP_1710	0.198373	non-ABT	non-ABT	97.8903	97.0464	96.6245	0
CLS01468	COG	dnaI	SP_1711	0.0143291	non-ABT	non-ABT	89.5973	97.651	96.9799	56.6667
CLS01469	COG	dnaB	SP_1712	0.68979	non-ABT	non-ABT	95.3728	94.8586	94.0874	0
CLS01470	COG	nrdR	SP_1713	0.135949	non-ABT	non-ABT	100	100	100	72.3926
CLS01471	COG	-	SP_1714	0.150644	non-ABT	non-ABT	100	97.5207	98.3471	0
CLS01472	COG	-	SP_1715	0	non-ABT	non-ABT	100	98.2684	98.7013	59.5745
CLS01473	COG	-	-	0.0805507	-	non-ABT	99.2157	0	74.902	0
CLS01474	COG	yhaP	SP_1716	0.00862597	non-ABT	non-ABT	99.4987	95.99	81.203	0
CLS01475	COG	-	SP_1717	0.644694	non-ABT	non-ABT	99.3266	97.3597	99.3266	0
CLS01476	COG	-	SP_1720	0.00461523	non-ABT	non-ABT	99.5122	88.5167	99.5122	0
CLS01477	COG	scrK	SP_1721	0.173167	non-ABT	non-ABT	99.661	98.9831	99.322	72.7273
CLS01478	COG	scrA	-	0.37313	-	non-ABT	0	0	0	70.5263
CLS01479	COG	-	SP_1723	0.135283	non-ABT	non-ABT	0	0	0	0
CLS01480	COG	scrB	SP_1724	0.307199	non-ABT	non-ABT	100	95.0413	95.4545	64.0496
CLS01481	COG	scrR	SP_1725	0.775372	non-ABT	non-ABT	100	97.8193	99.0654	68.8474
CLS01482	COG	mvaA	SP_1726	0.392775	non-ABT	non-ABT	100	96.4623	94.8113	63.466
CLS01483	COG	mvaS	SP_1727	0.420163	non-ABT	non-ABT	99.4872	98.2051	97.6923	66.7519
CLS01484	COG	-	SP_1728	0.287044	non-ABT	non-ABT	85.2632	74.7573	0	0
CLS01485	COG	-	SP_1730	0.014361	non-ABT	non-ABT	99.3289	73.1544	90.604	0
CLS01486	COG	yjjP	SP_1731	0.150837	non-ABT	non-ABT	100	98.8095	98.8095	0
CLS01487	CellWall	stkP	SP_1732	3.80251	ABT	ABT	99.5448	96.2064	74.1477	48.8235
CLS01488	COG	pppL	SP_1733	1.09693	non-ABT	non-ABT	99.5935	99.187	93.0894	56.5217
CLS01489	COG	rsmB	SP_1734	0.0222054	non-ABT	non-ABT	99.3135	96.3387	95.4233	64.1723
CLS01490	COG	fmt	SP_1735	1.22184	ABT	non-ABT	99.3569	98.0707	97.4277	72.3473
CLS01491	COG	priA	SP_1736	0.829072	non-ABT	non-ABT	99.6241	96.9925	95.614	65.3317
CLS01492	COG	rpoZ	SP_1737	0.368214	non-ABT	non-ABT	100	100	100	79.0476
CLS01493	COG	gmk	SP_1738	0.586805	non-ABT	non-ABT	99.5192	98.5577	99.0385	80.3738
CLS01494	COG	rny	SP_1739	1.78818	non-ABT	non-ABT	100	98.5102	98.8827	73.9292
CLS01496	COG	-	SP_1742	0.414529	non-ABT	non-ABT	97.2603	93.6986	93.4247	65.0273
CLS01497	COG	-	SP_1743	0.158959	non-ABT	non-ABT	100	92.126	91.0506	67.4074
CLS01498	COG	ybeB	SP_1744	0.88383	non-ABT	non-ABT	100	95.7265	83.7607	70.9402
CLS01499	COG	-	SP_1745	0.443208	non-ABT	non-ABT	98.1928	0	94.5783	0
CLS01500	COG	-	SP_1746	0.237717	non-ABT	non-ABT	96.9543	95.9391	92.8934	69.0355
CLS01501	COG	nadD	SP_1747	1.0478	non-ABT	non-ABT	97.6077	98.5646	95.6938	83.3333
CLS01502	COG	yhbY	SP_1748	0.220319	non-ABT	non-ABT	100	99.0291	100	81.5534
CLS01503	COG	yqeH	SP_1749	0.196219	non-ABT	non-ABT	98.6413	97.0109	97.8261	79.6196
CLS01504	COG	yqeG	SP_1750	0.414046	non-ABT	non-ABT	99.4286	96.5714	96.5714	62.2857
CLS01505	COG	-	SP_1751	0.0975224	non-ABT	non-ABT	98.0132	99.0066	80.4636	0
CLS01506	COG	ynaI	SP_1752	0.484839	non-ABT	non-ABT	99.4624	98.3871	90.8602	0
CLS01507	COG	dctA	-	0.119649	-	non-ABT	97.1963	76.1787	73.4491	0
CLS01508	COG	-	SP_1754	0.508645	non-ABT	non-ABT	99.6845	94.7205	96.53	0
CLS01509	COG	asp5	SP_1755	0.0819635	non-ABT	non-ABT	0	0	97.2973	0
CLS01510	COG	asp4	SP_1756	0.932873	non-ABT	non-ABT	0	0	94.9153	0
CLS01511	COG	gtfB	SP_1757	0.472108	non-ABT	non-ABT	0	0	92.809	0
CLS01512	COG	gtfA	SP_1758	0.581401	non-ABT	non-ABT	0	0	93.6382	0
CLS01513	COG	secA2	SP_1759	0.48077	ABT	non-ABT	0	0	94.0506	0
CLS01514	COG	asp3	SP_1760	0	non-ABT	non-ABT	0	0	97.9452	0
CLS01515	COG	asp2	SP_1761	0.378166	non-ABT	non-ABT	0	0	90.2153	0
CLS01516	COG	asp1	SP_1762	0.858701	non-ABT	non-ABT	0	0	92.5856	0
CLS01517	COG	secY2	SP_1763	0.307848	non-ABT	non-ABT	0	0	94.0741	0
CLS01518	COG	pvgP	SP_1764	0.668312	non-ABT	non-ABT	0	0	93.3555	0
CLS01519	COG	-	SP_1765	0.290169	non-ABT	non-ABT	0	0	85.1759	0
CLS01520	COG	-	SP_1766	0.385861	non-ABT	non-ABT	0	0	92.6108	0
CLS01521	COG	-	-	0.211922	-	non-ABT	0	0	41.0169	0
CLS01524	COG	nss	SP_1768	0.515817	non-ABT	non-ABT	0	0	93.4524	0
CLS01525	COG	-	SP_1769	0.0632578	non-ABT	non-ABT	0	0	0	0
CLS01526	COG	-	-	0.717836	-	non-ABT	0	0	0	0
CLS01527	COG	-	-	0	-	non-ABT	0	0	89.0411	0
CLS01529	COG	-	-	0.328973	-	non-ABT	0	0	0	0
CLS01530	COG	-	SP_1774	0	non-ABT	non-ABT	89.3617	86.5248	82.9787	0
CLS01531	COG	-	-	0.144901	-	non-ABT	100	93.1507	91.7808	0
CLS01532	COG	trx	SP_1776	0.0829772	non-ABT	non-ABT	99.0385	97.1154	98.0769	80.7692
CLS01533	COG	queF	SP_1777	0.334171	non-ABT	non-ABT	86.4407	70.7317	70.7317	61.3497
CLS01534	COG	aqpZ2	SP_1778	0.243735	non-ABT	non-ABT	99.0991	96.3964	95.045	0
CLS01535	COG	aqpZ	SP_1779	1.05801	non-ABT	non-ABT	66.9202	90.1141	88.2129	0
CLS01537	COG	pepF2	SP_1780	0.685136	non-ABT	non-ABT	98.9967	97.8261	98.3278	0
CLS01538	COG	rsmE	SP_1781	0.616498	non-ABT	non-ABT	99.5951	93.9271	94.332	69.6356
CLS01539	COG	prmA	SP_1782	0.553716	non-ABT	non-ABT	97.7848	96.519	96.2145	76.6562
CLS01540	COG	-	SP_1783	0.110263	non-ABT	non-ABT	97.1831	86.6197	82.4324	0
CLS01541	Degradative	-	SP_1784	2.63002	non-ABT	ABT	95.6403	97.2376	0	0
CLS01542	COG	-	SP_1785	0.223539	non-ABT	non-ABT	98.0769	98.7179	94.8718	58.9744
CLS01543	COG	-	SP_1786	0.012509	non-ABT	non-ABT	100	100	0	0
CLS01544	COG	rarA	SP_1790	0	non-ABT	non-ABT	99.2908	99.0544	98.3452	82.7423
CLS01545	COG	susH	SP_1795	0.960405	non-ABT	non-ABT	83.3713	96.8109	0	0
CLS01546	COG	susX	SP_1796	0.20017	non-ABT	non-ABT	0	63.0112	0	0
CLS01547	COG	susT1	SP_1797	0.31747	non-ABT	non-ABT	0	99.3243	0	0
CLS01548	COG	susT2	SP_1798	0.46356	non-ABT	non-ABT	0	99.6721	0	0
CLS01549	COG	susR	SP_1799	0.766197	non-ABT	non-ABT	0	98.4985	0	0
CLS01550	COG	atxA	SP_1800	0.24663	non-ABT	non-ABT	99.3915	0	94.3205	0
CLS01551	COG	glsB	SP_1801	0	non-ABT	non-ABT	0	0	57.6923	0
CLS01552	COG	-	SP_1802	0.0142074	non-ABT	non-ABT	99.4681	0	86.8421	0
CLS01553	COG	-	SP_1803	0	non-ABT	non-ABT	100	0	98.2143	0
CLS01554	COG	-	SP_1804	0.333455	ABT	non-ABT	100	0	98.5149	0
CLS01555	COG	-	SP_1805	0	non-ABT	non-ABT	100	0	98.5075	0
CLS01557	COG	-	-	1.14654	-	non-ABT	0	0	0	0
CLS01558	COG	-	-	0.448921	-	non-ABT	0	0	0	0
CLS01559	COG	ptcA	-	0.0803854	-	non-ABT	0	0	0	0
CLS01560	COG	-	-	0.0170963	-	non-ABT	0	0	0	0
CLS01561	COG	-	-	0.669662	-	non-ABT	0	0	0	0
CLS01562	COG	-	-	0.157726	-	non-ABT	0	0	0	0
CLS01563	COG	-	-	1.53878	-	non-ABT	0	0	0	0
CLS01564	COG	-	SP_1807	0.726496	non-ABT	non-ABT	97.2973	87.4172	74.0741	0
CLS01565	COG	pilD	SP_1808	0.164038	non-ABT	non-ABT	95.8904	94.0639	89.0411	0
CLS01566	COG	-	SP_1809	0.189656	non-ABT	non-ABT	99.2167	98.6945	0	0
CLS01567	COG	-	SP_1810	0.846967	non-ABT	non-ABT	100	97.9424	0	0
CLS01568	COG	trpA	SP_1811	0.333375	non-ABT	non-ABT	98.4496	97.2868	95.7364	70.7692
CLS01569	COG	trpB	SP_1812	0	non-ABT	non-ABT	99.5086	98.7715	98.7715	78.3784
CLS01570	COG	trpF	SP_1813	0.127332	non-ABT	non-ABT	98.4925	95.9799	91.9598	63.8191
CLS01571	COG	trpC	SP_1814	0.519481	non-ABT	non-ABT	99.2157	96.4706	93.3333	70.5882
CLS01572	COG	trpD	SP_1815	0.0191964	non-ABT	non-ABT	100	99.4012	97.3054	64.7761
CLS01573	COG	trpG	SP_1816	0.022848	non-ABT	non-ABT	98.9362	98.9362	96.8085	67.5532
CLS01574	COG	trpE	SP_1817	0.785801	non-ABT	non-ABT	98.6755	98.6755	97.5717	72.2467
CLS01575	COG	-	SP_1821	0.294733	non-ABT	non-ABT	100	100	0	0
CLS01576	COG	-	SP_1822	0.11723	non-ABT	non-ABT	100	51.6393	0	0
CLS01577	COG	sapB	SP_1823	0.312317	non-ABT	non-ABT	100	97.4576	0	0
CLS01578	COG	-	SP_1824	0	non-ABT	non-ABT	99.6448	99.1119	0	0
CLS01579	COG	-	SP_1825	0	non-ABT	non-ABT	99.7024	100	0	0
CLS01580	COG	-	SP_1826	0.364217	non-ABT	non-ABT	100	94.6479	0	0
CLS01581	COG	-	SP_1827	1.17335	non-ABT	non-ABT	100	98.1735	0	0
CLS01582	COG	galE1	SP_1828	0.371361	non-ABT	non-ABT	96.7262	99.7024	0	0
CLS01583	COG	-	SP_1829	0.543984	non-ABT	non-ABT	98.9817	97.7597	0	65.1731
CLS01584	COG	phoU3	SP_1830	0.0953166	non-ABT	non-ABT	96.7136	96.2441	0	0
CLS01585	COG	-	SP_1831	0.0215768	non-ABT	non-ABT	98.4962	53.2258	0	0
CLS01586	COG	-	SP_1832	0.0776873	non-ABT	non-ABT	100	0	0	0
CLS01587	Adhesin	pfbA	SP_1833	2.10458	non-ABT	ABT	100	84.1515	0	0
CLS01588	COG	arnB	SP_1837	0.787582	non-ABT	non-ABT	99.7549	98.0392	97.066	0
CLS01589	COG	wcaJ	SP_1838	1.23407	non-ABT	non-ABT	100	96.5217	97.3913	0
CLS01590	COG	yheH	SP_1839	0.403052	non-ABT	non-ABT	98.4563	95.5403	94.8542	75.9863
CLS01591	COG	yheI	SP_1840	0.125175	non-ABT	non-ABT	99.4836	94.4923	97.4182	77.4527
CLS01592	COG	-	SP_1841	0.0789595	non-ABT	non-ABT	46.0227	50	37.9147	25.1185
CLS01593	COG	-	SP_1843	0	non-ABT	non-ABT	100	45.6954	46.3576	28.4768
CLS01594	COG	xth	SP_1845	0.89257	non-ABT	non-ABT	99.6364	96.7273	96.3636	74.0741
CLS01595	COG	-	-	0.575737	-	non-ABT	0	0	0	0
CLS01596	COG	-	-	0.188415	-	non-ABT	100	50	50	0
CLS01597	COG	xpt	SP_1847	0.795416	non-ABT	non-ABT	98.9637	98.9637	98.4456	0
CLS01598	COG	pbuX	SP_1848	0.0147122	non-ABT	non-ABT	99.5238	98.3333	98.8095	0
CLS01599	COG	dpnD	SP_1849	0.578569	non-ABT	non-ABT	99.3464	0	0	0
CLS01600	COG	dpnC	SP_1850	0	non-ABT	non-ABT	38.5827	36.6142	0	0
CLS01601	COG	paaI	SP_1851	0.479171	non-ABT	non-ABT	99.2537	63.4328	97.0149	62.6866
CLS01602	COG	galT	SP_1852	0.307212	non-ABT	non-ABT	99.3915	94.5233	94.3205	0
CLS01603	COG	galK	SP_1853	0.580846	non-ABT	non-ABT	97.9592	97.449	96.4286	76.3959
CLS01604	COG	galR	SP_1854	1.40356	non-ABT	non-ABT	98.209	96.7164	96.4179	59.7015
CLS01605	COG	xylB	SP_1855	0.351882	non-ABT	non-ABT	94.7826	94.7826	0	63.3238
CLS01606	COG	adhR	SP_1856	0.242642	non-ABT	non-ABT	100	97.4359	0	0
CLS01607	COG	czcD	SP_1857	0.0217849	non-ABT	non-ABT	98.9865	98.3108	79.3919	0
CLS01608	COG	kstR2	SP_1858	0.223955	non-ABT	non-ABT	91.0112	91.573	77.5281	0
CLS01609	COG	pnuC	SP_1859	0.252165	non-ABT	non-ABT	100	100	0	0
CLS01610	COG	opuCC	SP_1860	0.0838925	non-ABT	non-ABT	97.8261	97.0356	96.6403	70.2756
CLS01611	COG	proV	SP_1861	0.467173	non-ABT	non-ABT	96.6942	94.6281	96.281	61.5702
CLS01612	COG	-	SP_1862	0.308796	non-ABT	non-ABT	99.6063	0	0	0
CLS01613	COG	-	SP_1863	0.123974	non-ABT	non-ABT	97.9592	95.2381	91.1565	0
CLS01614	COG	-	SP_1864	0.113502	non-ABT	non-ABT	95.9184	89.7959	91.8367	0
CLS01615	COG	pepA	SP_1865	0.576028	non-ABT	non-ABT	100	98.8701	98.0226	73.8028
CLS01616	COG	-	SP_1867	0.526783	non-ABT	non-ABT	98.2833	0	67.7711	0
CLS01617	COG	piuB	SP_1869	0	non-ABT	non-ABT	100	97.1787	0	0
CLS01618	COG	piuC	SP_1870	0.188452	non-ABT	non-ABT	99.0566	97.1698	0	0
CLS01619	COG	piuD	SP_1871	0.799761	non-ABT	non-ABT	99.2	96	0	47.0149
CLS01620	SBP	piuA	SP_1872	3.63035	non-ABT	ABT	99.0654	94.1176	0	0
CLS01621	COG	yidD	SP_1873	0.0536275	non-ABT	non-ABT	98.75	92.5	0	0
CLS01622	COG	rluB	SP_1874	0.00875551	non-ABT	non-ABT	100	99.5833	100	85
CLS01623	COG	scpB	SP_1875	0.465896	non-ABT	non-ABT	100	100	97.8836	64.8241
CLS01625	COG	xerD	SP_1877	0	non-ABT	non-ABT	100	91.4634	92.2764	0
CLS01626	COG	ykuL	SP_1878	0.238383	non-ABT	non-ABT	100	97.3856	96.732	0
CLS01627	COG	-	SP_1879	0.441681	non-ABT	non-ABT	99.422	97.1098	97.6879	60.6936
CLS01628	COG	rdgB	SP_1880	1.1107	non-ABT	non-ABT	99.3808	98.7616	92.2601	61.5616
CLS01629	COG	glr	SP_1881	0.560417	non-ABT	non-ABT	100	98.8636	98.8636	76.5152
CLS01630	COG	-	SP_1882	0.201703	non-ABT	non-ABT	100	98.7805	100	0
CLS01631	COG	treA	SP_1883	0	non-ABT	non-ABT	99.6303	97.2274	0	74.3542
CLS01632	COG	treP	SP_1884	0.217324	non-ABT	non-ABT	98.9313	98.3206	0	75.8779
CLS01633	COG	treR	SP_1885	0.403169	non-ABT	non-ABT	99.5763	97.4576	0	58.6498
CLS01634	COG	-	-	0.0181105	-	non-ABT	0	97.3783	97.7528	0
CLS01635	COG	-	-	0.0269134	-	non-ABT	0	96.9697	97.6431	0
CLS01636	COG	-	-	1.04176	-	non-ABT	0	50.1538	50.4615	0
CLS01637	COG	amiF	SP_1887	0.402934	non-ABT	non-ABT	99.6753	98.7013	99.026	54.8077
CLS01638	COG	amiE	SP_1888	0	ABT	non-ABT	99.4366	98.5915	98.8732	54.3662
CLS01639	COG	amiD	SP_1889	0.760241	non-ABT	non-ABT	100	98.3766	98.3766	0
CLS01640	COG	amiC	SP_1890	1.56971	non-ABT	non-ABT	99.3976	98.1928	94.7791	0
CLS01641	SBP	amiA	SP_1891	3.76128	ABT	ABT	95.9153	99.6965	80.2731	0
CLS01642	COG	-	SP_1893	0.0140484	non-ABT	non-ABT	100	82.8715	97.4811	0
CLS01643	COG	gtfA	SP_1894	0.36364	non-ABT	non-ABT	100	0	0	84.1996
CLS01644	COG	msmG	SP_1895	0.0264835	non-ABT	non-ABT	99.639	0	0	77.9783
CLS01645	COG	msmF	SP_1896	0.219119	non-ABT	non-ABT	98.9583	0	0	73.7931
CLS01646	COG	msmE	SP_1897	0.0816932	non-ABT	non-ABT	99.284	0	0	60.095
CLS01647	COG	aga	SP_1898	0.897674	non-ABT	non-ABT	99.5833	0	0	65.8333
CLS01648	COG	msmR	SP_1899	0.635922	non-ABT	non-ABT	98.951	0	0	0
CLS01649	COG	birA	SP_1900	0.0653803	non-ABT	non-ABT	99.3569	97.4277	94.8553	54.1667
CLS01650	COG	rumA2	SP_1901	0.0901087	non-ABT	non-ABT	99.1189	97.7974	97.1429	69.4989
CLS01651	COG	recX	SP_1902	0.345797	non-ABT	non-ABT	100	97.2868	95.7364	61.6279
CLS01652	COG	-	SP_1903	0	non-ABT	non-ABT	100	100	99.435	87.5706
CLS01653	COG	-	SP_1904	0	non-ABT	non-ABT	95.7265	31.1189	32.069	0
CLS01654	COG	groEL	SP_1906	1.96733	non-ABT	ABT	100	99.4444	98.8889	88.1919
CLS01655	COG	groES	SP_1907	0.0461199	non-ABT	non-ABT	97.8723	98.9362	97.8723	0
CLS01656	COG	ssbB	SP_1908	0.0147056	non-ABT	non-ABT	99.2366	99.2366	93.1298	75.5725
CLS01657	COG	ydfG	SP_1909	0.507405	non-ABT	non-ABT	99.2095	93.6759	95.2569	0
CLS01658	COG	-	SP_1910	0.87024	non-ABT	non-ABT	99.5215	97.6077	94.7368	74.1627
CLS01659	COG	-	SP_1911	0.367616	non-ABT	non-ABT	100	99.0476	97.1429	0
CLS01660	COG	-	SP_1912	0.545021	non-ABT	non-ABT	100	98.9899	98.9899	0
CLS01661	COG	-	-	0.384406	-	non-ABT	0	31.5217	0	0
CLS01662	COG	-	SP_1914	0.165417	non-ABT	non-ABT	98.6607	76.3393	74.5536	0
CLS01663	COG	-	SP_1915	0.108601	non-ABT	non-ABT	97.973	93.2432	91.8919	0
CLS01664	COG	bcrC	SP_1916	0.548884	non-ABT	non-ABT	98.2036	76.6467	71.2575	0
CLS01665	COG	-	SP_1917	0.481425	non-ABT	non-ABT	100	88.3333	0	0
CLS01666	COG	-	SP_1918	0.685778	non-ABT	non-ABT	98.2507	42.8328	42.8328	36.7174
CLS01667	COG	-	SP_1919	0.149548	non-ABT	non-ABT	100	37.1179	35.1443	21
CLS01668	COG	-	SP_1920	0.501209	non-ABT	non-ABT	69.8718	94.2308	85.2564	0
CLS01669	COG	yebC	SP_1922	0.0339954	non-ABT	non-ABT	100	98.3193	97.479	84.0336
CLS01670	COG	ply	SP_1923	1.37437	non-ABT	non-ABT	99.1507	98.9384	0	0
CLS01671	COG	-	SP_1924	0.200729	non-ABT	non-ABT	99.2647	97.7941	0	0
CLS01672	COG	-	SP_1925	0.672394	non-ABT	non-ABT	100	91.0891	0	0
CLS01673	COG	-	SP_1926	0.0189443	non-ABT	non-ABT	100	96.7105	0	0
CLS01674	COG	-	SP_1930	0.562545	non-ABT	non-ABT	95.3488	0	0	0
CLS01675	COG	-	SP_1931	0	non-ABT	non-ABT	97.8142	0	0	0
CLS01676	COG	-	SP_1933	0.584876	non-ABT	non-ABT	79.4562	0	0	0
CLS01677	COG	-	SP_1934	0.221286	non-ABT	non-ABT	97.1631	0	0	0
CLS01678	COG	-	SP_1935	0.391619	non-ABT	non-ABT	94.1176	0	0	0
CLS01679	COG	dinF	SP_1939	0.578236	non-ABT	non-ABT	99.1228	96.0526	97.5877	0
CLS01680	COG	recA	SP_1940	0.921263	non-ABT	non-ABT	99.7423	89.433	94.3299	82.3077
CLS01681	COG	cinA	SP_1941	0.525704	non-ABT	non-ABT	99.5215	93.0622	93.0622	69.74
CLS01682	CellWall	lytR	SP_1942	4.05073	non-ABT	ABT	99.4083	97.929	76.6382	43.5961
CLS01683	COG	-	SP_1943	0.0273926	non-ABT	non-ABT	99.4186	95.9302	86.6279	0
CLS01684	COG	ydiB	SP_1944	0.15163	non-ABT	non-ABT	99.3197	96.5986	92.517	60.8108
CLS01685	COG	-	SP_1945	0.137354	non-ABT	non-ABT	100	98.0583	0	0
CLS01686	COG	tprA	SP_1946	0.979798	non-ABT	non-ABT	97.2125	94.7735	95.8188	0
CLS01687	COG	-	SP_1956	0.229827	non-ABT	non-ABT	0	0	0	0
CLS01688	COG	-	SP_1957	0	non-ABT	non-ABT	97.619	0	0	0
CLS01689	COG	cinA2	SP_1958	0.664845	non-ABT	non-ABT	100	0	0	0
CLS01690	COG	ndk	SP_1959	0.281961	non-ABT	non-ABT	100	94.1606	92.8571	0
CLS01691	COG	rpoC	SP_1960	0.424081	non-ABT	non-ABT	99.8367	99.5918	99.3469	87.602
CLS01692	COG	rpoB	SP_1961	0.887364	non-ABT	non-ABT	99.9169	99.5012	98.9194	91.0224
CLS01693	COG	tlyC	SP_1963	0	non-ABT	non-ABT	99.7743	98.4199	94.3567	75.0562
CLS01694	COG	endA	SP_1964	0.0154947	non-ABT	non-ABT	99.635	91.3043	94.5652	54.0816
CLS01695	COG	epuA	SP_1965	0	non-ABT	non-ABT	96.875	92.1875	90.625	0
CLS01696	COG	murA	SP_1966	0.683915	non-ABT	non-ABT	99.7658	97.1897	97.4239	75.8782
CLS01697	COG	ylbL	SP_1967	0.21379	non-ABT	non-ABT	100	97.971	96.8116	58.7896
CLS01698	COG	coaD	SP_1968	0.540444	non-ABT	non-ABT	100	97.5309	93.2099	0
CLS01699	COG	rsmD	SP_1969	0.282352	non-ABT	non-ABT	98.324	97.7654	97.2067	74.7253
CLS01700	COG	asnA	SP_1970	0.37428	non-ABT	non-ABT	99.697	98.4848	97.8788	0
CLS01701	COG	ybhL	SP_1972	0.0543537	non-ABT	non-ABT	100	99.1189	97.3568	57.6419
CLS01702	COG	spoU	SP_1973	0.0266219	non-ABT	non-ABT	97.561	93.9024	95.5285	0
CLS01703	COG	acyP	SP_1974	0.659259	non-ABT	non-ABT	100	98.913	59.1398	69.5652
CLS01704	COG	misCB	SP_1975	0.5736	non-ABT	non-ABT	98.3766	97.4026	96.4286	0
CLS01705	COG	pflA	SP_1976	0	non-ABT	non-ABT	99.2424	98.4848	98.4848	76.5152
CLS01706	COG	lysA	SP_1978	1.38453	non-ABT	non-ABT	99.5192	96.875	97.1154	68.0288
CLS01707	COG	purR	SP_1979	0	non-ABT	non-ABT	100	96.3636	97.4545	76.7273
CLS01708	COG	yhaM	SP_1980	0.175721	ABT	non-ABT	99.361	96.1783	97.7636	76.087
CLS01709	COG	rmuC	SP_1981	2.5635	non-ABT	ABT	98.5646	97.6077	96.6507	57.6037
CLS01710	COG	thiN	SP_1982	0.580301	non-ABT	non-ABT	97.2727	96.3636	94.0909	0
CLS01711	COG	rpe	SP_1983	1.1267	non-ABT	non-ABT	99.5413	95.8716	97.2477	65.2968
CLS01712	COG	engC	SP_1984	0.307891	non-ABT	non-ABT	100	98.2877	97.9452	72.6027
CLS01713	COG	ksgA	SP_1985	0.934789	non-ABT	non-ABT	99.3103	97.931	97.931	79.3814
CLS01714	COG	-	SP_1986	0.186535	non-ABT	non-ABT	92.1569	90.1961	0	0
CLS01715	COG	-	SP_1987	0	non-ABT	non-ABT	100	98.1221	0	0
CLS01716	COG	-	SP_1988	0.27612	non-ABT	non-ABT	98.8166	94.5266	0	0
CLS01717	COG	-	-	1.09069	-	non-ABT	0	82.6531	0	0
CLS01719	COG	-	SP_1990	0.256747	non-ABT	non-ABT	98.9247	97.3118	95.2128	63.0332
CLS01721	COG	-	SP_1992	0.522112	ABT	non-ABT	73.064	0	0	0
CLS01722	COG	rpmH	SP_1993	0	non-ABT	non-ABT	0	0	0	0
CLS01723	COG	alaT	SP_1994	0	non-ABT	non-ABT	99.7525	98.0198	99.0099	85.8911
CLS01724	COG	-	SP_1996	0.0560403	non-ABT	non-ABT	87.1345	85.9649	86.5497	57.3099
CLS01725	COG	-	SP_1997	0.455421	non-ABT	non-ABT	88.3117	96.9762	95.2484	52.9787
CLS01727	COG	ccpA	SP_1999	0.79335	ABT	non-ABT	100	96.131	95.8333	75.5952
CLS01728	COG	-	SP_2000	0.172732	non-ABT	non-ABT	100	94.4724	92.9648	64.3216
CLS01729	COG	desK	SP_2001	0.0783511	non-ABT	non-ABT	100	90.137	88.2192	0
CLS01730	COG	-	SP_2002	0.241626	non-ABT	non-ABT	99.5918	93.0612	91.0204	0
CLS01731	COG	ybhF	SP_2003	0.580052	non-ABT	non-ABT	100	86.7347	87.415	57.2391
CLS01732	COG	-	SP_2004	0.222393	non-ABT	non-ABT	100	73.4375	70.3125	0
CLS01733	COG	-	SP_2005	0.27423	non-ABT	non-ABT	100	83.8235	82.5397	0
CLS01734	COG	comX	SP_2006	0	non-ABT	non-ABT	99.3711	90.566	89.3082	0
CLS01735	COG	nusG	SP_2007	0.529843	non-ABT	non-ABT	100	99.4382	98.8764	81.4607
CLS01736	COG	secE	SP_2008	0.18262	non-ABT	non-ABT	100	100	100	0
CLS01737	COG	pbp2a	SP_2010	0.956893	non-ABT	non-ABT	100	97.948	96.4529	56.9554
CLS01738	COG	rluD	SP_2011	0	non-ABT	non-ABT	93.4708	88.6598	91.0072	63.2302
CLS01739	COG	gap	SP_2012	0.413823	non-ABT	non-ABT	99.7015	99.7015	95.2381	92.5816
CLS01740	COG	-	SP_2013	0.676177	non-ABT	non-ABT	93.125	67.1429	0	0
CLS01741	COG	-	SP_2015	0.384102	non-ABT	non-ABT	99.1736	77.8689	0	0
CLS01742	COG	nadC	SP_2016	1.35742	non-ABT	non-ABT	99.6552	0	0	0
CLS01743	COG	-	SP_2017	0.0288498	non-ABT	non-ABT	99.5413	0	0	0
CLS01744	COG	-	SP_2019	0	non-ABT	non-ABT	96.875	0	0	0
CLS01746	COG	-	SP_2021	0.500863	ABT	non-ABT	99.1471	0	0	0
CLS01747	COG	licC	SP_2022	0.461698	non-ABT	non-ABT	75.406	0	0	0
CLS01748	COG	licB	SP_2023	0.481171	non-ABT	non-ABT	99.0196	0	0	0
CLS01749	COG	gmuA	SP_2024	0.0775857	non-ABT	non-ABT	100	0	0	0
CLS01750	COG	adhE	SP_2026	0.934357	non-ABT	non-ABT	99.7735	89.581	96.1369	45.671
CLS01751	COG	-	SP_2027	0.600294	ABT	non-ABT	100	96.3235	97.0588	0
CLS01752	COG	yfkJ	SP_2028	0.540215	non-ABT	non-ABT	99.2958	93.1973	92.517	58.3333
CLS01753	COG	-	SP_2029	1.55316	non-ABT	non-ABT	100	94.9495	93.9394	0
CLS01754	COG	tkt1	SP_2030	0.888722	non-ABT	non-ABT	99.2401	98.1763	97.8723	78.5714
CLS01755	COG	ulaG	SP_2031	0.402501	non-ABT	non-ABT	99.7245	0	98.8981	86.7769
CLS01756	COG	-	SP_2032	0.363239	non-ABT	non-ABT	99.2819	0	97.4865	0
CLS01757	COG	ulaF	SP_2033	0	non-ABT	non-ABT	100	0	96.5957	65.1261
CLS01758	COG	ulaE	SP_2034	0.292693	non-ABT	non-ABT	99.3031	0	96.1672	82.9268
CLS01759	COG	ulaD	SP_2035	0.807962	non-ABT	non-ABT	100	0	99.095	88.2353
CLS01760	COG	ulaC	SP_2036	0.245	non-ABT	non-ABT	100	0	98.1366	79.5031
CLS01761	COG	ulaB	SP_2037	0	non-ABT	non-ABT	100	0	98.9247	77.4194
CLS01762	COG	ulaA	SP_2038	0.0857506	non-ABT	non-ABT	99.5876	0	98.7629	82.0988
CLS01763	COG	sapR	SP_2039	0.553998	ABT	non-ABT	97.5845	84.058	82.9384	0
CLS01764	COG	-	SP_2040	0.422982	non-ABT	non-ABT	94.5122	94.8171	86.9301	49.5468
CLS01765	COG	misCA	SP_2041	0.234287	non-ABT	non-ABT	99.6377	97.4638	97.8261	0
CLS01766	COG	rnpA	SP_2042	0.128759	non-ABT	non-ABT	100	96.748	95.935	0
CLS01767	COG	ackA	SP_2044	0.488588	non-ABT	non-ABT	99.7475	98.4848	89.6725	71.6418
CLS01768	COG	-	SP_2045	0.167556	non-ABT	non-ABT	97.7918	97.1609	95.2681	52.9968
CLS01769	COG	-	-	0.00365131	-	non-ABT	99.2063	0	25.1282	0
CLS01770	COG	-	SP_2047	1.2417	non-ABT	non-ABT	95.6204	91.9708	89.781	0
CLS01771	COG	comYF	SP_2048	0.821863	ABT	non-ABT	94.7712	93.4641	94.1176	0
CLS01772	COG	comYE	SP_2049	0.865646	non-ABT	non-ABT	100	99	99	0
CLS01773	COG	comYD	SP_2050	0	non-ABT	non-ABT	95.5224	91.791	92.5373	0
CLS01774	COG	comYC	SP_2051	0.679428	ABT	non-ABT	98.1481	88.8889	89.8148	62.037
CLS01775	COG	comYB	SP_2052	0.197784	non-ABT	non-ABT	98.6207	94.8276	95.1724	51.3761
CLS01776	COG	comYA	SP_2053	0.363768	non-ABT	non-ABT	99.0415	99.0415	97.1246	65.6051
CLS01777	COG	-	SP_2054	0	non-ABT	non-ABT	100	95.0413	94.2149	0
CLS01778	COG	adh	SP_2055	0.631159	non-ABT	non-ABT	99.4318	63.3523	98.8636	0
CLS01779	COG	nagA	SP_2056	0.781303	non-ABT	non-ABT	100	97.9112	95.5614	62.2396
CLS01780	COG	oatA	SP_2057	0.161268	non-ABT	non-ABT	99.3388	94.7107	94.5455	51.1513
CLS01781	COG	tgt	SP_2058	0.429997	non-ABT	non-ABT	100	99.2105	99.2105	90
CLS01782	COG	-	SP_2059	0	non-ABT	non-ABT	98.9474	92.4658	93.4932	0
CLS01783	COG	-	SP_2060	0	non-ABT	non-ABT	0	72.8972	93.4579	0
CLS01784	COG	-	SP_2061	0.102862	non-ABT	non-ABT	80.6723	85.2459	0	0
CLS01785	COG	-	SP_2062	0	non-ABT	non-ABT	65.2482	91.4894	0	0
CLS01786	CellWall	lysM	SP_2063	5.31815	non-ABT	ABT	95	87.2449	85.7855	0
CLS01787	COG	-	SP_2064	0.0399621	non-ABT	non-ABT	100	86.4734	87.9227	0
CLS01788	COG	mepA	SP_2065	0.326547	non-ABT	non-ABT	99.5305	94.8357	94.6009	0
CLS01789	COG	thrC	SP_2066	0.41824	non-ABT	non-ABT	95.1417	94.1296	95.5466	77.1255
CLS01790	COG	-	SP_2067	0.39895	non-ABT	non-ABT	99.0588	92	86.5882	54.9065
CLS01791	COG	-	SP_2068	0.754726	non-ABT	non-ABT	97.9167	94.4444	95.8333	0
CLS01792	COG	glnS	SP_2069	0.466645	non-ABT	non-ABT	99.177	98.5597	98.5597	87.8601
CLS01793	COG	gpi	SP_2070	1.2186	non-ABT	non-ABT	99.7773	98.8864	98.6637	82.6281
CLS01794	COG	-	SP_2072	0.62297	non-ABT	non-ABT	100	97.8166	97.3799	0
CLS01795	COG	patB	SP_2073	0	non-ABT	non-ABT	99.6599	96.5986	96.4286	0
CLS01797	COG	mutS	SP_2076	0.713065	non-ABT	non-ABT	100	96.8009	95.8531	71.9114
CLS01798	COG	argR	SP_2077	0.0866115	non-ABT	non-ABT	100	97.973	97.973	0
CLS01799	COG	argS	SP_2078	0.565551	non-ABT	non-ABT	100	97.8686	97.3357	79.3961
CLS01800	COG	-	SP_2081	0.838197	non-ABT	non-ABT	98.7342	98.1013	0	0
CLS01801	COG	phoP	SP_2082	0	non-ABT	non-ABT	100	100	0	0
CLS01802	COG	phoR	SP_2083	0.393233	non-ABT	non-ABT	99.5485	99.5485	0	0
CLS01803	SBP	pstS1	SP_2084	3.69874	non-ABT	ABT	100	99.3127	0	0
CLS01804	COG	pstC2	SP_2085	0.296231	non-ABT	non-ABT	94.4251	99.6516	0	0
CLS01805	COG	pstA2	SP_2086	0.150812	non-ABT	non-ABT	99.262	100	0	0
CLS01806	COG	pstB3	SP_2087	0	non-ABT	non-ABT	100	99.2	0	0
CLS01807	COG	phoU2	SP_2088	0.100376	non-ABT	non-ABT	100	100	0	0
CLS01808	COG	-	SP_2089	0.298123	non-ABT	non-ABT	100	95.7447	0	0
CLS01809	COG	-	SP_2090	0.674218	non-ABT	non-ABT	100	55	0	0
CLS01810	COG	gpsA	SP_2091	0.42811	non-ABT	non-ABT	100	96.4497	97.929	81.7109
CLS01811	COG	galU	SP_2092	0.110876	ABT	non-ABT	98.6622	93.6455	94.3144	84.9673
CLS01812	COG	gluP	SP_2094	0.393824	non-ABT	non-ABT	100	93.7778	93.3333	0
CLS01813	COG	yqgN	SP_2095	0.304505	non-ABT	non-ABT	93.8547	90.5028	89.9441	0
CLS01814	COG	ykuR	SP_2096	1.34515	non-ABT	non-ABT	98.1383	96.8085	96.2766	74.0053
CLS01815	COG	dapD	SP_2097	0.329955	non-ABT	non-ABT	99.569	98.7069	98.2759	84.4828
CLS01816	COG	-	SP_2098	0.203954	non-ABT	non-ABT	99.67	97.0297	95.7096	0
CLS01817	COG	pbp1a	SP_2099	0.614772	ABT	non-ABT	99.6346	98.0512	54.8426	55.8363
CLS01818	COG	tyrS	SP_2100	0.150448	non-ABT	non-ABT	99.2823	98.5646	98.5646	81.8182
CLS01819	COG	cadA	SP_2101	0.290652	non-ABT	non-ABT	89.2285	87.9185	86.5889	0
CLS01820	COG	-	SP_2102	0.100008	non-ABT	non-ABT	100	98.913	98.913	0
CLS01821	COG	rrmA	SP_2103	0.377842	non-ABT	non-ABT	99.6454	97.1631	91.1348	0
CLS01822	COG	-	SP_2105	2.51022	non-ABT	ABT	98.9474	98.4211	0	0
CLS01823	COG	-	-	0.12335	-	non-ABT	0	0	0	0
CLS01824	COG	malP	SP_2106	0.199338	non-ABT	non-ABT	100	99.3351	98.4043	69.2612
CLS01825	COG	malQ	SP_2107	0.531546	non-ABT	non-ABT	99.802	98.4158	98.4158	55.3816
CLS01826	SBP	malX	SP_2108	3.34357	ABT	ABT	99.7636	88.6525	93.8534	0
CLS01827	COG	malC	SP_2109	0.278242	non-ABT	non-ABT	98.8506	97.7011	96.3218	0
CLS01828	COG	malD	SP_2110	0.256963	non-ABT	non-ABT	100	96.0714	97.5	0
CLS01829	COG	malA	SP_2111	0.0859628	non-ABT	non-ABT	98.8722	96.9925	94.3609	0
CLS01830	COG	malR	SP_2112	1.97642	non-ABT	non-ABT	99.6951	97.561	93.5976	0
CLS01831	COG	-	SP_2113	0.1866	non-ABT	non-ABT	100	78.9137	97.1246	65.1757
CLS01832	COG	aspS	SP_2114	0.830269	non-ABT	non-ABT	99.1482	98.1261	98.1261	77.2496
CLS01833	COG	-	SP_2115	0	non-ABT	non-ABT	100	97.3684	90.7895	0
CLS01834	COG	-	SP_2116	0.0998057	non-ABT	non-ABT	98.1221	99.061	84.0376	0
CLS01836	COG	-	SP_2118	0.096817	non-ABT	non-ABT	95.3846	84.6154	87.6923	0
CLS01837	COG	-	SP_2119	0.347306	non-ABT	non-ABT	100	91.5493	90.1408	0
CLS01838	COG	-	-	0.941528	-	non-ABT	98.0769	0	70.1923	0
CLS01839	COG	hisS	SP_2121	1.45573	non-ABT	non-ABT	98.3683	96.9697	98.6014	75.0583
CLS01840	COG	-	SP_2122	0.0698265	non-ABT	non-ABT	98.0723	93.9759	91.5663	0
CLS01841	COG	rgg	SP_2123	0.282875	non-ABT	non-ABT	98.2332	93.2862	95.4064	0
CLS01842	COG	-	SP_2125	0.426805	non-ABT	non-ABT	99.115	97.3451	95.5752	66.3717
CLS01843	COG	ilvD	SP_2126	0.5217	non-ABT	non-ABT	99.8236	99.8236	99.4709	87.7408
CLS01844	COG	tktC	SP_2127	0.385936	non-ABT	non-ABT	97.4194	97.4194	96.7742	0
CLS01845	COG	tktN	SP_2128	0.4236	ABT	non-ABT	99.2982	98.9474	96.4912	0
CLS01846	COG	-	SP_2129	0.19074	non-ABT	non-ABT	99.3304	99.1071	99.1071	0
CLS01847	COG	-	SP_2130	0.077836	non-ABT	non-ABT	100	100	96.8085	0
CLS01848	COG	cmtB	SP_2131	0.0986232	non-ABT	non-ABT	99.7041	99.4083	94.3787	0
CLS01849	COG	-	SP_2132	0.392762	non-ABT	non-ABT	99.7015	0	0	0
CLS01850	COG	rpmF	SP_2134	0.128259	non-ABT	non-ABT	100	100	100	88.3333
CLS01851	COG	rpmG	SP_2135	0	non-ABT	non-ABT	0	0	0	0
CLS01852	Adhesin	pcpA	SP_2136	4.86791	ABT	ABT	77.6097	86.8321	0	0
CLS01853	COG	-	SP_2139	0.274254	non-ABT	non-ABT	83.3333	78.7037	0	0
CLS01854	COG	gcnA	SP_2141	0.127891	ABT	non-ABT	98.8818	94.7284	93.131	0
CLS01855	COG	-	SP_2142	0	non-ABT	non-ABT	98.9761	95.5631	95.9044	0
CLS01856	COG	mngB	SP_2143	0.271996	non-ABT	non-ABT	98.6379	95.5732	95.2327	0
CLS01857	COG	-	SP_2144	0.770636	non-ABT	non-ABT	98.8263	98.1221	97.4178	0
CLS01858	COG	-	SP_2145	0.329792	non-ABT	non-ABT	97.2622	90.8309	91.7867	0
CLS01859	COG	fucA	SP_2146	0.186493	non-ABT	non-ABT	94.4544	89.3238	90.5357	0
CLS01860	COG	arcA	SP_2148	0.211679	non-ABT	non-ABT	59.6577	0	0	0
CLS01861	COG	arcB	SP_2150	0.00638566	non-ABT	non-ABT	100	0	0	57.3964
CLS01862	COG	arcC	SP_2151	0.977466	non-ABT	non-ABT	100	0	0	66.4557
CLS01863	COG	-	SP_2152	0.311217	non-ABT	non-ABT	100	0	0	0
CLS01864	COG	arcT	SP_2153	0.622343	non-ABT	non-ABT	99.3228	0	0	0
CLS01865	COG	-	-	0.144916	-	non-ABT	100	0	0	0
CLS01866	COG	-	SP_2155	0.277851	non-ABT	non-ABT	0	0	0	0
CLS01867	COG	qmcA	SP_2156	1.16267	non-ABT	non-ABT	100	99.3311	98.3278	81.6054
CLS01868	COG	adhB	SP_2157	0.319121	non-ABT	non-ABT	99.2167	0	0	0
CLS01869	COG	fucI	SP_2158	1.14122	non-ABT	non-ABT	97.2789	0	0	0
CLS01870	COG	-	SP_2159	1.04603	non-ABT	non-ABT	99.9037	0	0	0
CLS01871	COG	-	SP_2160	0.221268	non-ABT	non-ABT	100	0	0	0
CLS01872	COG	-	SP_2161	0.506114	non-ABT	non-ABT	100	0	0	0
CLS01873	COG	-	SP_2162	0.153697	non-ABT	non-ABT	100	0	0	0
CLS01874	COG	-	SP_2163	0.744025	non-ABT	non-ABT	99.359	0	0	0
CLS01875	COG	-	SP_2164	0.178942	non-ABT	non-ABT	99.3197	0	0	0
CLS01876	COG	fucU	SP_2165	0.322482	non-ABT	non-ABT	100	0	0	0
CLS01877	COG	fucA	SP_2166	0.170849	non-ABT	non-ABT	99.5283	0	0	0
CLS01878	COG	fucK	SP_2167	0.355261	non-ABT	non-ABT	99.5717	0	0	0
CLS01879	COG	fcsR	SP_2168	0	non-ABT	non-ABT	99.2218	0	0	0
CLS01882	COG	-	SP_0808	0.716073	non-ABT	non-ABT	0	75.5556	32.5359	0
CLS01884	COG	-	-	0.218203	-	non-ABT	0	83.6364	85.5856	0
CLS01886	COG	-	-	0	-	non-ABT	0	0	0	0
CLS01887	COG	-	-	3.22877	-	ABT	0	0	0	0
CLS01888	COG	-	-	0.146052	-	non-ABT	0	0	0	0
CLS01889	COG	-	-	1.30463	-	non-ABT	0	0	0	0
CLS01910	COG	-	-	1.65846	-	non-ABT	0	0	0	0
CLS01915	COG	-	-	0.342344	-	non-ABT	0	0	0	0
CLS01916	COG	-	-	0.260462	-	non-ABT	0	81.9672	0	0
CLS01917	COG	-	-	0.148387	-	non-ABT	0	0	0	0
CLS01921	COG	-	-	0.288027	-	non-ABT	0	92.1875	0	0
CLS01922	COG	-	-	0	-	non-ABT	0	96.875	0	0
CLS01923	COG	-	-	0.221326	-	non-ABT	0	98.0769	0	0
CLS01925	COG	-	-	0.05041	-	non-ABT	0	62.2449	0	0
CLS01926	COG	-	-	0.518353	-	non-ABT	0	86.9159	0	0
CLS01927	COG	-	-	0	-	non-ABT	0	0	0	0
CLS01928	COG	-	-	0.109858	-	non-ABT	0	89.0295	0	0
CLS01934	COG	-	-	0.147458	-	non-ABT	0	0	0	0
CLS01936	COG	-	-	0.174657	-	non-ABT	0	0	0	0
CLS01937	COG	aliB	-	0.131631	-	non-ABT	87.7193	0	0	0
CLS01938	COG	cbpCJ	SP_0378	1.33582	ABT	non-ABT	0	75.4438	0	0
CLS01939	COG	-	-	0.298559	-	non-ABT	0	0	0	0
CLS01940	COG	tnp	SP_0460	0	non-ABT	non-ABT	0	0	0	58.6698
CLS01941	COG	rlrA	SP_0461	0.454228	non-ABT	non-ABT	0	0	0	0
CLS01943	Adhesin	rrgB3	-	0.790677	-	non-ABT	0	0	0	0
CLS01944	COG	rrgC	SP_0464	0.43977	non-ABT	non-ABT	0	0	0	0
CLS01945	COG	srtB	SP_0466	1.48512	ABT	non-ABT	0	0	0	0
CLS01946	COG	srtC	SP_0467	0.189833	non-ABT	non-ABT	0	0	0	0
CLS01947	COG	srtD	SP_0468	0.276498	ABT	non-ABT	0	0	0	0
CLS01948	COG	mlc	SP_0473	0.869822	non-ABT	non-ABT	99.5086	0	0	0
CLS01949	COG	-	SP_0474	0.251329	non-ABT	non-ABT	99.7727	0	0	0
CLS01950	COG	-	SP_0475	0.204286	non-ABT	non-ABT	98.2484	0	0	0
CLS01951	COG	lacF1	SP_0476	0.324343	non-ABT	non-ABT	99.1228	0	0	0
CLS01952	COG	lacG1	SP_0477	1.31065	non-ABT	non-ABT	98.0851	0	0	0
CLS01953	COG	lacE1	SP_0478	0.164344	non-ABT	non-ABT	96.9589	0	0	0
CLS01954	COG	spnIVRhsdS	SP_0507	0.344665	non-ABT	non-ABT	0	0	0	0
CLS01955	COG	ivrR	SP_0506	0	non-ABT	non-ABT	99.6226	98.4906	0	0
CLS01956	COG	blpA2	SP_0530	0.814551	non-ABT	non-ABT	98.9744	0	0	0
CLS01957	COG	fic	SP_0571	0.0408017	non-ABT	non-ABT	99.2509	98.5019	95.5056	0
CLS01958	COG	-	SP_0698	0.037542	non-ABT	non-ABT	99.5781	0	0	58.2278
CLS01960	COG	-	-	0.012513	-	non-ABT	0	0	0	0
CLS01961	COG	-	-	1.40384	-	non-ABT	100	29.5374	29.5374	0
CLS01962	COG	efeN	-	0.879929	-	non-ABT	99.7006	79.2079	78.9604	0
CLS01963	COG	-	-	0.298817	-	non-ABT	0	0	0	0
CLS01964	COG	-	-	0.633685	-	non-ABT	0	0	0	0
CLS01965	COG	-	-	1.13877	-	non-ABT	0	0	0	0
CLS01966	COG	-	-	0.953007	-	non-ABT	0	0	0	0
CLS01967	COG	-	-	0.0123845	-	non-ABT	0	0	0	0
CLS01968	COG	-	-	0.296858	-	non-ABT	0	0	0	0
CLS01969	COG	-	-	0.1681	-	non-ABT	0	0	0	0
CLS01970	COG	nanE	-	0.194001	-	non-ABT	0	0	0	0
CLS01971	COG	-	-	0.518543	-	non-ABT	0	0	0	0
CLS01972	COG	-	-	0.137922	-	non-ABT	0	0	0	0
CLS01973	COG	-	SP_1339	0	non-ABT	non-ABT	0	0	0	0
CLS01974	COG	-	SP_1340	0	non-ABT	non-ABT	99.0888	0	0	0
CLS01975	COG	-	SP_1341	0.549435	non-ABT	non-ABT	48.374	0	0	0
CLS01977	COG	ptrB	SP_1343	0.227923	non-ABT	non-ABT	99.5356	0	0	0
CLS01979	COG	-	SP_1344	0.666637	non-ABT	non-ABT	76.87	0	0	0
CLS01981	COG	-	-	0.00582927	-	non-ABT	0	0	0	0
CLS01983	COG	-	-	0	-	non-ABT	0	0	0	0
CLS01984	COG	-	-	0.714085	-	non-ABT	97.7273	0	0	0
CLS01985	COG	-	-	0.216565	-	non-ABT	99.3846	0	0	0
CLS01986	COG	-	-	0	-	non-ABT	97.5806	0	0	0
CLS01987	COG	-	-	0.175866	-	non-ABT	96.6667	84	0	0
CLS01988	COG	-	SP_0055	0.0472921	non-ABT	non-ABT	100	98.6667	84	0
CLS01991	Degradative	zmpC	SP_0071	4.24619	ABT	ABT	0	0	0	0
CLS01994	COG	int	-	0.143626	-	non-ABT	0	0	78.3505	0
CLS02007	COG	-	-	0.0297895	-	non-ABT	100	0	0	0
CLS02014	COG	mtlA	SP_0394	0.160974	non-ABT	non-ABT	94.7368	94.0577	0	68.3587
CLS02015	COG	-	SP_0395	0.53984	non-ABT	non-ABT	99.8464	99.5392	0	53.3026
CLS02016	COG	mtlF	SP_0396	0.270385	non-ABT	non-ABT	99.3103	99.3103	0	73.1034
CLS02017	COG	mtlD	SP_0397	0.361131	non-ABT	non-ABT	98.9418	98.4127	0	67.0157
CLS02021	COG	-	SP_0332	0.778476	non-ABT	non-ABT	0	72.7778	71.1111	0
CLS02041	COG	blpC	-	0.0598935	-	non-ABT	100	0	0	0
CLS02042	COG	blpZ	SP_0546	0.144735	non-ABT	non-ABT	85.3659	85.3659	95.122	0
CLS02044	COG	-	SP_0574	0	non-ABT	non-ABT	67.2209	0	0	0
CLS02047	COG	-	SP_0584	0.153093	non-ABT	non-ABT	67.0455	0	0	0
CLS02048	COG	-	SP_0639	0.0819452	non-ABT	non-ABT	0	0	0	0
CLS02052	COG	rlmN	SP_0768	0.391571	non-ABT	non-ABT	96.3989	84.4687	97.2299	85.0416
CLS02083	COG	phtE (fragment)	-	0	-	non-ABT	0	0	0	0
CLS02091	COG	-	SP_1148	0.346953	non-ABT	non-ABT	63.3929	82.7957	0	0
CLS02110	COG	kcsA	-	0.109389	-	non-ABT	0	0	0	0
CLS02135	COG	yoeB	SP_1740	0.284415	non-ABT	non-ABT	98.8095	97.619	0	0
CLS02136	COG	-	SP_1741	0.157618	non-ABT	non-ABT	96.5116	94.186	0	0
CLS02144	COG	-	SP_1789	0	non-ABT	non-ABT	100	84.8101	0	0
CLS02145	COG	butA	-	0.112566	-	non-ABT	0	85.7143	0	0
CLS02148	COG	-	SP_1995	0.45427	non-ABT	non-ABT	98.9691	92	83	0
CLS02149	COG	tnp	SP_2179	0.126322	non-ABT	non-ABT	0	99.1071	0	0
CLS02154	COG	-	-	0.483077	-	non-ABT	0	0	0	0
CLS02157	COG	glf	-	3.74801	-	ABT	0	38.2514	38.7978	0
CLS02161	COG	-	SP_0666	0	non-ABT	non-ABT	0	88.2927	87.8049	0
CLS02162	COG	-	SP_0679	0.0950149	non-ABT	non-ABT	86.6667	0	0	0
CLS02195	COG	-	SP_0115	0.234884	non-ABT	non-ABT	94.4444	0	0	0
CLS02196	COG	-	-	0.574249	-	non-ABT	100	0	0	0
CLS02197	COG	-	-	0.491817	-	non-ABT	100	0	0	0
CLS02198	COG	-	-	0.103043	-	non-ABT	83.8972	0	0	0
CLS02199	COG	-	SP_0114	0.341638	non-ABT	non-ABT	99.3031	96.1672	87.8049	0
CLS02230	COG	-	-	0.191156	-	non-ABT	0	0	0	0
CLS02231	COG	-	SP_2133	0.301696	non-ABT	non-ABT	100	98.4848	100	0
CLS02235	COG	-	SP_2140	0.443648	non-ABT	non-ABT	0	0	0	0
CLS02249	COG	-	-	0.323276	-	non-ABT	0	75.2212	86.7257	0
CLS02251	COG	-	-	0	-	non-ABT	0	0	74.2424	0
CLS02254	COG	-	-	0.124253	-	non-ABT	0	0	0	0
CLS02255	COG	-	-	0.0184815	-	non-ABT	0	0	0	0
CLS02258	COG	-	SP_1134	0	non-ABT	non-ABT	0	59.8086	61.0577	0
CLS02263	COG	-	-	0.0756719	-	non-ABT	0	95.3608	0	0
CLS02270	COG	-	SP_1611	0.0186775	non-ABT	non-ABT	0	0	0	0
CLS02320	COG	-	-	0	-	non-ABT	0	0	0	0
CLS02350	COG	-	SP_0882	0.831243	non-ABT	non-ABT	94.8905	93.0657	92.7007	0
CLS02361	COG	-	-	0.68391	-	non-ABT	0	0	0	0
CLS02362	COG	-	-	0.179186	-	non-ABT	0	0	0	0
CLS02363	COG	-	-	0	-	non-ABT	0	0	0	0
CLS02364	COG	-	-	0.44567	-	non-ABT	0	79.0123	0	0
CLS02366	COG	-	SP_0142	0.165571	non-ABT	non-ABT	100	0	0	0
CLS02367	COG	-	SP_0143	0.352303	non-ABT	non-ABT	99.1111	0	0	0
CLS02368	COG	-	SP_1057	0.327559	non-ABT	non-ABT	0	0	85.4167	0
CLS02379	COG	-	-	0.325704	-	non-ABT	0	0	92.9752	0
CLS02388	COG	-	SP_0302	0.132097	non-ABT	non-ABT	90.0826	0	0	0
CLS02389	COG	bglA1	SP_0303	0.248694	non-ABT	non-ABT	98.5356	98.954	0	85.7741
CLS02390	COG	-	SP_0304	0.116849	non-ABT	non-ABT	98.7342	96.2025	0	0
CLS02391	COG	celB	SP_0305	0.743602	non-ABT	non-ABT	92.0354	90.2655	0	0
CLS02392	COG	-	SP_0307	0.824166	non-ABT	non-ABT	97.4203	98.1791	0	0
CLS02393	COG	-	SP_0308	0.554377	non-ABT	non-ABT	100	100	0	74.0385
CLS02394	COG	-	SP_0309	0.356425	non-ABT	non-ABT	96.4286	97.619	0	0
CLS02395	COG	-	SP_0310	0.336334	non-ABT	non-ABT	98.4375	98.6607	0	75.4425
CLS02405	COG	rmlA	-	0.336079	-	non-ABT	0	0	0	90.3114
CLS02406	COG	rmlC	-	0.180705	-	non-ABT	0	0	0	84.3434
CLS02407	COG	rmlB	-	0.496419	-	non-ABT	0	0	0	89.9713
CLS02408	COG	rmlD	-	0.322944	-	non-ABT	0	0	0	86.9718
CLS02410	COG	cbpF	SP_0391	1.90051	non-ABT	non-ABT	83.5294	87.0588	72.1739	0
CLS02412	COG	-	SP_0539	0.155514	non-ABT	non-ABT	0	0	0	0
CLS02414	COG	-	SP_0567	0.344067	non-ABT	non-ABT	0	94.7917	90.625	0
CLS02416	COG	-	SP_0570	0.0332998	non-ABT	non-ABT	0	0	0	0
CLS02419	COG	-	-	0.270644	-	non-ABT	0	0	0	0
CLS02420	COG	-	-	0.542073	-	non-ABT	97.2973	0	0	0
CLS02422	COG	-	SP_0997	0.0373947	non-ABT	non-ABT	0	0	0	0
CLS02423	COG	-	SP_1038	0.159608	non-ABT	non-ABT	0	0	0	0
CLS02425	Adhesin	phtA	SP_1175	4.88317	ABT	ABT	0	0	0	0
CLS02429	COG	-	-	0.047099	-	non-ABT	0	0	0	0
CLS02432	COG	-	SP_1612	0	non-ABT	non-ABT	0	0	0	0
CLS02433	COG	tkt2	-	0.7566	-	non-ABT	0	0	0	0
CLS02434	COG	-	SP_1616	0.77813	non-ABT	non-ABT	0	0	0	0
CLS02435	COG	-	SP_1617	0.357738	non-ABT	non-ABT	0	0	0	0
CLS02436	COG	-	SP_1618	0.0235314	non-ABT	non-ABT	0	0	0	0
CLS02437	COG	-	SP_1619	0.273486	non-ABT	non-ABT	0	0	0	0
CLS02438	COG	-	SP_1620	0.522273	non-ABT	non-ABT	0	0	0	0
CLS02439	COG	-	SP_1621	0.680027	non-ABT	non-ABT	0	0	0	0
CLS02442	COG	-	-	0.471028	-	non-ABT	0	0	0	0
CLS02443	COG	-	-	0.385862	-	non-ABT	0	0	0	0
CLS02445	COG	-	SP_1932	0.0450564	non-ABT	non-ABT	100	0	0	0
CLS02446	COG	phrA	SP_1947	0.676407	non-ABT	non-ABT	83.9286	82.1429	0	0
CLS02448	COG	-	SP_2046	0.119361	non-ABT	non-ABT	98.3333	0	0	0
CLS02449	COG	-	-	0.124375	-	non-ABT	95.7143	0	0	0
CLS02450	COG	-	-	0.43543	-	non-ABT	62.2378	0	0	0
CLS02455	COG	-	-	0.289187	-	non-ABT	0	0	81.4324	0
CLS02456	COG	-	-	0.13159	-	non-ABT	0	0	99.3103	0
CLS02457	COG	-	-	0.12985	-	non-ABT	0	0	94.8718	0
CLS02460	COG	-	-	0.502544	-	non-ABT	0	0	0	0
CLS02462	COG	-	SP_1336	0.72739	non-ABT	non-ABT	0	0	85.6512	0
CLS02466	COG	-	-	0.0722414	-	non-ABT	0	74.4898	72.1649	0
CLS02472	COG	-	-	0	-	non-ABT	0	22.2408	0	0
CLS02490	COG	-	-	0.466063	-	non-ABT	0	0	34.7826	0
CLS02494	COG	-	SP_0109	0.534403	non-ABT	non-ABT	67.3684	66.3158	0	0
CLS02495	COG	-	SP_0110	0.229735	non-ABT	non-ABT	99.7151	77.4929	87.7493	0
CLS02496	COG	-	SP_0111	0.087318	non-ABT	non-ABT	100	98.1221	97.6526	0
CLS02497	COG	-	SP_0112	0.149088	non-ABT	non-ABT	100	100	93.2836	52.0295
CLS02498	COG	argG	SP_0113	0	non-ABT	non-ABT	0	0	0	0
CLS02518	COG	wzx	-	0.111231	-	non-ABT	0	0	0	0
CLS02522	COG	-	SP_0907	0.248703	non-ABT	non-ABT	99.7006	23.6152	0	0
CLS02546	COG	-	-	0.227289	-	non-ABT	50.8685	0	0	0
CLS02549	COG	-	SP_1281	0.0211771	non-ABT	non-ABT	0	90.4762	84.4037	0
CLS02553	COG	scrA	SP_1722	0.00238882	non-ABT	non-ABT	99.681	94.2675	95.2229	0
CLS02557	COG	-	-	0.145264	-	non-ABT	0	0	0	0
CLS02558	COG	ubiE	-	0.0111354	-	non-ABT	0	96.4981	96.1089	0
CLS02559	COG	-	-	0.326394	-	non-ABT	98.4615	92.3077	81.5385	0
CLS02572	COG	-	-	0.202916	-	non-ABT	0	100	0	0
CLS02574	COG	-	SP_1844	0.312436	non-ABT	non-ABT	97.3333	0	0	0
CLS02576	COG	-	-	0.318156	-	non-ABT	0	0	75.5682	0
CLS02578	COG	-	-	0.872913	-	non-ABT	0	0	0	0
CLS02579	COG	-	-	0.247075	-	non-ABT	0	0	94.4056	0
CLS02580	COG	-	-	0	-	non-ABT	0	91.5493	95.7746	0
CLS02581	COG	-	SP_1135	0.719681	non-ABT	non-ABT	0	0	0	0
CLS02587	COG	-	-	0	-	non-ABT	0	0	0	0
CLS02591	COG	-	-	1.00264	-	non-ABT	0	0	0	0
CLS02595	COG	-	SP_0708	0.111344	non-ABT	non-ABT	100	0	0	0
CLS02596	COG	-	SP_0832	0.0514249	non-ABT	non-ABT	0	0	0	0
CLS02608	Degradative	zmpD	-	5.07336	-	ABT	0	0	0	0
CLS02632	COG	-	-	0.191743	-	non-ABT	0	64.3478	0	0
[truncated: 192 more rows]
