# Supplementary material for: Panproteome-wide analysis of antibody responses to whole cell pneumococcal vaccination
Source: eLife. 2018 Dec 28;7:e37015. doi: 10.7554/eLife.37015 (PMC6344088; doi:10.7554/eLife.37015)
Supplement: Supplementary file 2. — Each row corresponds to a probe on the proteome array associated with a significant change in IgG binding following WCV administration. The first six columns describe the functional annotation and classification of the corresponding protein, as well as whether it was categorised as an antibody-binding target (ABT) on the basis of high IgG binding in the pre-vaccination sample (Croucher et al., 2017). The next six columns contain statistics from the empirical Bayes analysis, in cases where there was a significant difference in Δ0→84 between cohort three and the placebo group; otherwise, the cells contain ‘NA’. These numbers describe the comparison of Δ0→84 values between cohort three and the placebo group. The t statistic and B value, representing the log odds that the IgG binding differs between cohort three and the placebo group, are shown, along with the p values following individual tests, and after a Benjamini-Hochberg correction. The next four columns show the empirical Bayes statistics for an identical analysis in which all probes corresponding to the DCL were excluded. The next four columns show the output of the linear mixed effects model test for probes exhibiting a significantly increasing trend in IgG binding over the duration of the trial; otherwise, the cells contain ‘NA’. The time coefficient describes the change in IgG binding over the trial in the vaccinated cohorts; only one probe has a negative coefficient, indicating vaccine doses reduced IgG binding over time. The table also shows calculation of a χ2 statistic as part of a likelihood ratio test conducted against a linear mixed effects model with no time-dependent term, the resulting raw likelihood ratio, and the Benjamini-Hochberg corrected p value. The final two columns show the likelihood and adjusted p values for the same statistical test conducted with all DCL probes excluded; only the latter value differs between the two analyses. [file elife-37015-supp2.xlsx]

## Sheet: Supplementary File 2
	Functional information					Empirical Bayes analysis with DCL						Empirical Bayes analysis without DCL				Linear mixed effects model with DCL				Linear mixed effects model without DCL
Probe	Protein	Gene Name	Pre-vaccination IgG binding categorisation	Functional categorisation in this study	Funtional Annotation	Mean difference in Δ0→84 between cohort 3 and placebo group	Mean Δ0→84 value across cohort 3 and placebo group	t	B	Empirical Bayes unadjusted p Value	Empirical Bayes adjusted p Value	t (no DCL)	B (no DCL)	Empirical Bayes unadjusted p Value (no DCL)	Empirical Bayes adjusted p Value (no DCL)	Linear mixed effects model time coefficient	Linear mixed effects model time chi squared	Linear mixed effects model time likelihood ratio test	Linear mixed effects model adjusted p value	Linear mixed effects model time likelihood ratio test (no DCL)	Linear mixed effects model adjusted p value (no DCL)
7622_5#77_CLS01333_s3_278	CLS01333	pclA	ABT	Adhesin	pneumococcal collagen-like protein A	0.265383	0.0290111	3.56841	-1.0979	0.00124919	0.0278692	NA	NA	NA	NA	NA	NA	NA	NA	NA	NA
6999_4#6_CLS03265_s2_2573	CLS03265	pclA	non-ABT	Adhesin	Pneumococcal collagen-like protein A	0.40911	0.125447	3.3919	-1.53102	0.0019902	0.0394059	NA	NA	NA	NA	0.0019873	9.78198	0.00176231	0.0242121	0.00176231	0.0364035
6999_4#6_CLS03265_1277	CLS03265	pclA	non-ABT	Adhesin	Pneumococcal collagen-like protein A	NA	NA	NA	NA	NA	NA	NA	NA	NA	NA	0.00160598	12.2024	0.000477285	0.0079581	0.000477285	0.0124634
7622_5#77_CLS01305_4478	CLS01305	mltG	ABT	CellWall	Endolytic murein transglycosylase MltG (EC 4.2.2.-)	0.568354	0.227197	5.60164	4.2221	4.48261e-06	0.000505579	5.60163	4.22843	4.4625e-06	0.00177952	0.00355322	32.4716	1.20947e-08	1.5965e-06	1.20947e-08	1.52173e-06
7622_2#37_CLS00355_a3_2256	CLS00355_a3	pbp2x	ABT	CellWall	Penicillin binding protein 2X	0.752484	0.361502	4.31231	0.803179	0.000164961	0.00584373	4.31424	0.860099	0.000163702	0.0135798	0.00581026	16.5521	4.73317e-05	0.00110522	4.73317e-05	0.00190993
7622_2#29_CLS01435_a3_2255	CLS01435_a3	pbp2b	ABT	CellWall	Penicillin binding protein 2B	0.54103	0.264792	4.25241	0.646727	0.000194698	0.00642502	4.25346	0.703202	0.000193707	0.0149952	0.00394012	26.3987	2.77725e-07	1.62408e-05	2.77725e-07	2.13539e-05
7622_5#77_CLS01280_906	CLS01280	pgdA	ABT	CellWall	Peptidoglycan-N-acetylglucosamine deacetylase PgdA (EC 3.5.1.104)	0.709721	0.31047	3.87558	-0.325556	0.000547047	0.0148366	3.87741	-0.256027	0.000543421	0.0340544	0.00494811	27.191	1.84313e-07	1.21647e-05	1.84313e-07	1.50053e-05
7622_5#95_CLS00355_a1_950	CLS00355_a1	pbp2x	ABT	CellWall	Penicillin binding protein 2X	0.620154	0.273333	3.85382	-0.380959	0.000580328	0.0150695	3.85539	-0.311445	0.000576889	0.0343074	0.00487432	13.1168	0.000292655	0.00520861	0.000292655	0.0081007
7622_5#59_CLS01435_a2_2253	CLS01435_a2	pbp2b	ABT	CellWall	Penicillin binding protein 2B	0.584079	0.267752	3.824	-0.456703	0.000629154	0.0158187	3.82545	-0.386676	0.000625666	0.0343074	0.00426619	24.8981	6.04427e-07	2.90125e-05	6.04427e-07	4.18263e-05
7622_5#77_CLS00741_1237	CLS00741	ezrA	ABT	CellWall	Septation ring formation regulator EzrA	0.493142	0.216836	3.64867	-0.898222	0.00100852	0.023152	3.64975	-0.82435	0.00100418	0.0455688	0.00339294	16.8824	3.97681e-05	0.000984261	3.97681e-05	0.00169757
7622_5#77_CLS00381_a1_1242	CLS00381_a1	pbp1a	non-ABT	CellWall	Penicillin binding protein 1A	0.634808	0.232312	3.47593	-1.32592	0.00159585	0.0343232	NA	NA	NA	NA	0.00378571	13.5929	0.000227044	0.00428141	0.000227044	0.00686704
7622_5#77_CLS01817_2869	CLS01817	pbp1b	non-ABT	CellWall	Penicillin-binding protein 1B	0.285494	0.0879128	3.45864	-1.36828	0.00167026	0.0352758	NA	NA	NA	NA	NA	NA	NA	NA	NA	NA
7622_5#77_CLS01426_4088	CLS01426	sepF	non-ABT	CellWall	Cell division protein SepF	0.799892	0.408491	3.32667	-1.68879	0.00235955	0.0450304	NA	NA	NA	NA	0.00633438	20.7985	5.10216e-06	0.00015542	5.10216e-06	0.000243496
7622_5#56_CLS01435_a4_1273	CLS01435_a4	pbp2b	ABT	CellWall	Penicillin binding protein 2B	0.550668	0.295602	3.31861	-1.70817	0.00240948	0.0454359	NA	NA	NA	NA	0.00454058	25.0671	5.53696e-07	2.7408e-05	5.53696e-07	4.03324e-05
7622_2#29_CLS00381_a3_4848	CLS00381_a3	pbp1a	non-ABT	CellWall	Penicillin binding protein 1A	0.493644	0.179861	3.31208	-1.72387	0.00245071	0.0456697	NA	NA	NA	NA	0.00283803	14.1202	0.000171493	0.00341184	0.000171493	0.00567572
7622_5#77_CLS00046_1518	CLS00046	mreC	ABT	CellWall	Peptidoglycan formation protein C MreC	NA	NA	NA	NA	NA	NA	NA	NA	NA	NA	0.00251698	9.17497	0.00245347	0.0313411	0.00245347	0.0478254
7622_5#77_CLS01186_1873	CLS01186	psr	ABT	CellWall	Teichoic acid attachment protein Psr	NA	NA	NA	NA	NA	NA	NA	NA	NA	NA	0.00319112	16.8489	4.04766e-05	0.000986384	4.04766e-05	0.00169757
7622_5#77_CLS01682_2834	CLS01682	lytR	ABT	CellWall	Teichoic acid attachment protein LytR	NA	NA	NA	NA	NA	NA	NA	NA	NA	NA	0.00162164	11.6303	0.000648852	0.0104876	0.000648852	0.0166298
7622_5#77_CLS01435_a1_3509	CLS01435_a1	pbp2b	ABT	CellWall	Penicillin binding protein 2B	NA	NA	NA	NA	NA	NA	NA	NA	NA	NA	0.00405386	24.3826	7.89768e-07	3.67939e-05	7.89768e-07	5.20495e-05
7622_5#77_CLS01487_4158	CLS01487	stkP	ABT	CellWall	Serine/threonine-protein kinase StkP (EC 2.7.11.1)	NA	NA	NA	NA	NA	NA	NA	NA	NA	NA	0.0012716	10.8335	0.000996804	0.0151821	0.000996804	0.0229929
7622_5#77_CLS00792_4787	CLS00792	pbp3	ABT	CellWall	D-alanyl-D-alanine carboxypeptidase Pbp3	NA	NA	NA	NA	NA	NA	NA	NA	NA	NA	0.00239418	11.2338	0.000803228	0.0127231	0.000803228	0.0198512
7622_5#59_CLS00355_a2_5167	CLS00355_a2	pbp2x	ABT	CellWall	Penicillin binding protein 2X	NA	NA	NA	NA	NA	NA	NA	NA	NA	NA	0.00492325	11.4735	0.000705953	0.0112952	0.000705953	0.0177643
7622_5#77_CLS00596_s3_4166	CLS00596	bgaA	ABT	Degradative	Beta-galactosidase BgaA (EC 3.2.1.23)	0.603473	0.203423	5.17999	3.1006	1.46002e-05	0.00105122	5.18083	3.12521	1.45116e-05	0.00233134	0.00342713	24.0865	9.2106e-07	4.05266e-05	9.2106e-07	5.7943e-05
7622_5#77_CLS00066_3809	CLS00066	htrA	ABT	Degradative	Surface-associated serine protease HtrA (EC 3.4.21.107)	0.581516	0.305985	3.39313	-1.52804	0.00198381	0.0394059	NA	NA	NA	NA	0.00514557	31.7868	1.72061e-08	1.94951e-06	1.72061e-08	1.83438e-06
7622_5#77_CLS00596_s1_277	CLS00596	bgaA	ABT	Degradative	Beta-galactosidase BgaA (EC 3.2.1.23)	NA	NA	NA	NA	NA	NA	NA	NA	NA	NA	0.00242668	12.4598	0.000415815	0.00700693	0.000415815	0.0110671
ATCC700669_CBD_2257	CBD		non-ABT	Other	Choline binding domain	0.634853	0.170112	8.28142	10.9966	3.41296e-09	5.40613e-06	8.27718	10.8671	3.4137e-09	4.49243e-06	0.00291409	16.4865	4.89985e-05	0.0011242	4.89985e-05	0.00190993
7622_5#77_CLS00702_4761	CLS00702	slrA	ABT	Other	Peptidyl-prolyl cis-trans isomerase SlrA (EC 5.2.1.8)	1.6009	0.765871	6.3428	6.17249	5.74114e-07	0.000121926	6.34641	6.15727	5.65021e-07	0.000371784	0.0121711	54.4483	1.59588e-13	1.71135e-10	1.59588e-13	1.49527e-10
7622_4#8_CLS02831_2239	CLS02831		non-ABT	Other	bacteriocin ABC processing efflux pump	0.395771	0.148456	5.50876	3.97546	5.81174e-06	0.000568193	5.50503	3.97567	5.84729e-06	0.00177952	0.00238462	19.1229	1.22567e-05	0.00034669	1.22567e-05	0.000565443
7622_5#77_CLS01686_4762	CLS01686	tprA	non-ABT	Other	Quorum-sensing PclR-type transcriptional regulator TprA	0.429026	0.109478	5.45565	3.83429	6.74296e-06	0.000593381	5.45318	3.83985	6.7611e-06	0.00177952	0.00185057	9.48887	0.00206722	0.0275166	0.00206722	0.0408718
7622_5#77_CLS00137_3773	CLS00137	frlR	non-ABT	Other	HTH-type transcriptional repressor FrlR	1.90275	0.82829	5.28174	3.37153	1.09762e-05	0.000827917	5.28504	3.39882	1.08326e-05	0.00233134	0.0127813	34.8092	3.63644e-09	7.80321e-07	3.63644e-09	6.81796e-07
7622_5#77_CLS00234_1492	CLS00234		ABT	Other	Hypothetical lipoprotein	0.645886	0.184064	5.14609	3.01032	1.60565e-05	0.00105973	5.14729	3.03713	1.59438e-05	0.00233134	0.00322425	16.4603	4.96804e-05	0.0011242	4.96804e-05	0.00190993
7622_5#77_CLS01670_4792	CLS01670	ply	non-ABT	Other	Pneumolysin	0.570149	0.23535	5.15508	3.03427	1.56566e-05	0.00105973	5.15563	3.05902	1.55752e-05	0.00233134	0.00420189	34.6527	3.94102e-09	7.80321e-07	3.94102e-09	6.81796e-07
7622_5#77_CLS01867_2499	CLS01867	qmcA	non-ABT	Other	Membrane-associated protease regulator QmcA	1.49696	0.875216	4.83198	2.17467	3.87348e-05	0.00219128	4.83491	2.21716	3.82989e-05	0.00504013	0.0133742	45.5573	1.48241e-11	7.82713e-09	1.48241e-11	6.83885e-09
7622_5#77_CLS01337_5124	CLS01337		non-ABT	Other	Uncharacterised membrane protein	1.01148	0.405022	4.73623	1.92056	5.06419e-05	0.00258764	4.73872	1.96517	5.01421e-05	0.00599882	0.0068386	31.4568	2.03925e-08	2.15344e-06	2.03925e-08	2.01594e-06
7622_5#77_CLS00868_4759	CLS00868	pyrK	non-ABT	Other	Dihydroorotate dehydrogenase B (NAD(+)) electron transfer subunit PyrK	0.254216	0.0229749	4.61087	1.58863	7.18914e-05	0.0033493	4.6034	1.61143	7.32055e-05	0.00801824	NA	NA	NA	NA	NA	NA
7622_5#77_CLS00320_4450	CLS00320	manL	non-ABT	Other	Glucose mannose galactose fructose N-acetylglucosamine and glucosamine ABC transporter ATPase ManL	1.08106	0.530122	4.57265	1.48763	7.9984e-05	0.00358402	4.57518	1.5378	7.92075e-05	0.00801824	0.00862436	39.3286	3.58154e-10	9.45527e-08	3.58154e-10	8.26142e-08
7622_5#77_CLS01753_4386	CLS01753	yajC	non-ABT	Other	Preprotein translocase YajC subunit	1.70878	1.01457	4.40162	1.03722	0.000128763	0.00494807	4.4044	1.09355	0.000127461	0.0119813	0.0161633	43.1421	5.09039e-11	2.01579e-08	5.09039e-11	1.76128e-08
7622_5#77_CLS01488_4751	CLS01488	pppL	non-ABT	Other	Protein phosphatase PhpP (EC 3.1.3.16)	0.563369	0.0697554	4.31001	0.797162	0.000166015	0.00584373	4.31117	0.852146	0.000165104	0.0135798	NA	NA	NA	NA	NA	NA
7622_5#77_CLS00386_3172	CLS00386		ABT	Other	Hypothetical membrane protein	0.378237	0.195073	4.09063	0.226521	0.000304059	0.00926211	4.09005	0.28374	0.000303935	0.022221	0.00325572	31.784	1.72305e-08	1.94951e-06	1.72305e-08	1.83438e-06
7622_5#77_CLS01024_3482	CLS01024	acoC	non-ABT	Other	Dihydrolipoyllysine-residue acetyltransferase component of pyruvate dehydrogenase complex AcoC (EC 2.3.1.12)	0.728752	0.199595	3.9472	-0.142616	0.000450198	0.0125108	3.94907	-0.0749941	0.000447107	0.0294196	0.00328309	10.2565	0.00136207	0.0197938	0.00136207	0.0294548
7622_5#77_CLS01283_5106	CLS01283	tuf	non-ABT	Other	Elongation factor Tu	1.37593	0.566506	3.82833	-0.445724	0.000621828	0.0158187	3.83072	-0.373446	0.000616798	0.0343074	0.00973982	21.8313	2.9771e-06	9.62393e-05	2.9771e-06	0.000147154
7622_5#77_CLS01129_5059	CLS01129	lemA	non-ABT	Other	Uncharacterised membrane protein LemA	1.29419	0.570167	3.79673	-0.525834	0.00067732	0.0167637	3.79908	-0.452795	0.000671953	0.0353716	0.00864622	23.0556	1.57383e-06	5.79756e-05	1.57383e-06	9.07577e-05
7622_4#38_CLS01171_1914	CLS01171		non-ABT	Other	conjugative element protein	0.228109	0.0359102	3.72336	-0.71098	0.000825437	0.0195148	3.71895	-0.652765	0.000834018	0.0391988	NA	NA	NA	NA	NA	NA
7622_5#77_CLS01820_825	CLS01820		non-ABT	Other	Uncharacterised exported protein	0.289314	0.114615	3.47412	-1.33036	0.00160348	0.0343232	NA	NA	NA	NA	0.00176003	10.9225	0.000950047	0.0146104	0.000950047	0.0222858
7622_5#77_CLS00459_1234	CLS00459	glnPH1	non-ABT	SBP	Glutamine ABC transporter permease GlnPH1	0.451351	0.275461	3.45321	-1.38158	0.00169432	0.0353132	NA	NA	NA	NA	0.00403658	32.7609	1.04218e-08	1.50073e-06	1.04218e-08	1.44237e-06
7622_5#77_CLS00229_3451	CLS00229		non-ABT	Other	Hypothetical membrane protein	1.02223	0.374248	3.43587	-1.42394	0.00177336	0.0364806	NA	NA	NA	NA	0.00537988	13.4424	0.000245998	0.00447885	0.000245998	0.00709293
7622_5#77_CLS01014_s1_3510	CLS01014	rexA	non-ABT	Other	ATP-dependent helicase/nuclease subunit RexA (EC 3.1.-.-)	0.415954	0.144556	3.38076	-1.55805	0.00204906	0.0400704	NA	NA	NA	NA	NA	NA	NA	NA	NA	NA
7622_5#77_CLS01654_266	CLS01654	groEL	ABT	Other	Chaperonin GroEL	0.703012	0.328879	3.35605	-1.61788	0.00218567	0.0422207	NA	NA	NA	NA	0.00563736	28.5791	8.99455e-08	7.31949e-06	8.99455e-08	7.99414e-06
7622_5#77_CLS01709_3814	CLS01709	rmuC	ABT	Other	DNA recombination protein RmuC	0.296584	0.127039	3.29746	-1.75899	0.00254552	0.0468849	NA	NA	NA	NA	0.00203493	12.6066	0.000384378	0.00654683	0.000384378	0.010431
7622_5#77_CLS01226_1153	CLS01226	yoxC	non-ABT	Other	Uncharacterised membrane protein YoxC	NA	NA	NA	NA	NA	NA	NA	NA	NA	NA	0.00517984	13.7072	0.000213639	0.00407716	0.000213639	0.00671991
6925_1#52_CLS00168_1253	CLS00168		ABT	Other	Uncharacterised membrane protein	NA	NA	NA	NA	NA	NA	NA	NA	NA	NA	0.00400901	22.5074	2.09337e-06	7.0551e-05	2.09337e-06	0.000107305
7622_5#77_CLS00190_1464	CLS00190	cibA	non-ABT	Other	Competence-induced bacteriocin A	NA	NA	NA	NA	NA	NA	NA	NA	NA	NA	0.0122598	28.5266	9.24178e-08	7.31949e-06	9.24178e-08	7.99414e-06
7622_5#77_lytA_1854	lytA	lytA	ABT	Other	Lytic amidase A	NA	NA	NA	NA	NA	NA	NA	NA	NA	NA	0.00151672	10.7427	0.00104692	0.0157935	0.00104692	0.023753
7622_5#77_CLS01181_1863	CLS01181	tagB	non-ABT	Other	Membrane-associated protein TagB	NA	NA	NA	NA	NA	NA	NA	NA	NA	NA	0.00267302	9.62166	0.00192296	0.0258133	0.00192296	0.0385707
7622_5#77_CLS00496_1891	CLS00496	dnaK	non-ABT	Other	Chaperone protein DnaK	NA	NA	NA	NA	NA	NA	NA	NA	NA	NA	0.00603277	10.1549	0.00143921	0.0207247	0.00143921	0.0306442
7622_5#77_CLS01383_2134	CLS01383		ABT	Other	Uncharacterised membrane protein	NA	NA	NA	NA	NA	NA	NA	NA	NA	NA	0.00397922	17.2796	3.22638e-05	0.000824289	3.22638e-05	0.00144042
7622_5#77_CLS01359_2138	CLS01359	dpr	non-ABT	Other	DNA protection during starvation stress resistance protein Dpr (EC 1.16.-.-)	NA	NA	NA	NA	NA	NA	NA	NA	NA	NA	0.00286929	14.9769	0.000108833	0.00232962	0.000108833	0.00386219
7622_5#77_CLS00433_2458	CLS00433	fabE	non-ABT	Other	Biotin carboxyl carrier protein of acetyl-CoA carboxylase FabE	NA	NA	NA	NA	NA	NA	NA	NA	NA	NA	0.003202	14.112	0.00017224	0.00341184	0.00017224	0.00567572
7622_5#77_CLS00718_2514	CLS00718	hylD	ABT	Other	Efflux pump protein HylD	NA	NA	NA	NA	NA	NA	NA	NA	NA	NA	0.00292148	13.5427	0.000233201	0.00429524	0.000233201	0.00686704
7622_4#39_CLS02897_2563	CLS02897		non-ABT	Other	membrane protein (fragment)	NA	NA	NA	NA	NA	NA	NA	NA	NA	NA	0.00147544	9.94367	0.00161403	0.0224266	0.00161403	0.0338458
7622_5#77_CLS01602_2856	CLS01602	galT	non-ABT	Other	Galactose-1-phosphate uridylyltransferase GalT (EC 2.7.7.12)	NA	NA	NA	NA	NA	NA	NA	NA	NA	NA	-0.00130493	10.4492	0.00122705	0.018165	0.00122705	0.027391
7622_5#77_CLS01446_3461	CLS01446		non-ABT	Other	Sialic acid and N-acetylmannosamine ABC transporter permease	NA	NA	NA	NA	NA	NA	NA	NA	NA	NA	0.00168927	10.9644	0.00092877	0.014566	0.00092877	0.0222858
7622_5#77_CLS01630_3735	CLS01630	yneF	non-ABT	Other	Uncharacterised protein YneF	NA	NA	NA	NA	NA	NA	NA	NA	NA	NA	0.00431281	8.8023	0.00300851	0.0378213	NA	NA
7622_5#77_CLS01348_3783	CLS01348	ybbR	ABT	Other	Uncharacterised protein YbbR	NA	NA	NA	NA	NA	NA	NA	NA	NA	NA	0.00196327	10.408	0.00125467	0.0184019	0.00125467	0.027563
7622_5#77_CLS00885_4121	CLS00885	ppmA	ABT	Other	Foldase protein PpmA (EC 5.2.1.8)	NA	NA	NA	NA	NA	NA	NA	NA	NA	NA	0.006163	40.1858	2.30918e-10	7.3155e-08	2.30918e-10	6.39182e-08
7622_5#77_CLS01563_4782	CLS01563		non-ABT	Other	ROK-family transcriptional repressor protein	NA	NA	NA	NA	NA	NA	NA	NA	NA	NA	0.00335744	9.69483	0.00184788	0.0250174	0.00184788	0.0376097
7622_4#31_PspA_32_3220	PspA_32	pspA	non-ABT	PspA	Pneumococcal surface protein A	0.39023	0.149209	5.39352	3.66902	8.0245e-06	0.00066899	NA	NA	NA	NA	0.00221027	20.1956	6.99147e-06	0.000208953	NA	NA
7622_5#92_PspA_25_4526	PspA_25	pspA	ABT	PspA	Pneumococcal surface protein A	0.356369	0.173479	4.80859	2.11256	4.13571e-05	0.00225895	NA	NA	NA	NA	0.00286372	19.7463	8.84309e-06	0.000254681	NA	NA
7622_5#74_PspA_16_4525	PspA_16	pspA	ABT	PspA	Pneumococcal surface protein A	0.3587	0.193126	4.39487	1.01951	0.000131199	0.00494807	NA	NA	NA	NA	0.00271091	17.4779	2.90666e-05	0.000754778	NA	NA
6999_6#16_PspA_14_2251	PspA_14	pspA	ABT	PspA	Pneumococcal surface protein A	0.513167	0.213038	4.06216	0.152982	0.000328764	0.00967509	NA	NA	NA	NA	0.00374707	25.0775	5.5072e-07	2.7408e-05	NA	NA
7622_5#59_PspA_21_4845	PspA_21	pspA	ABT	PspA	Pneumococcal surface protein A	0.339366	0.122014	3.28013	-1.80053	0.00266247	0.0479245	NA	NA	NA	NA	NA	NA	NA	NA	NA	NA
7622_3#91_PspA_12_309	PspA_12	pspA	ABT	PspA	Pneumococcal surface protein A	NA	NA	NA	NA	NA	NA	NA	NA	NA	NA	0.00150635	9.77074	0.00177311	0.0242121	NA	NA
6999_1#11_PspA_11_1282	PspA_11	pspA	ABT	PspA	Pneumococcal surface protein A	NA	NA	NA	NA	NA	NA	NA	NA	NA	NA	0.00175002	10.0983	0.00148407	0.021178	NA	NA
6952_4#6_PspA_37_1287	PspA_37	pspA	ABT	PspA	Pneumococcal surface protein A	NA	NA	NA	NA	NA	NA	NA	NA	NA	NA	0.00231704	10.4925	0.00119857	0.0179107	NA	NA
7553_4#7_PspA_29_1607	PspA_29	pspA	non-ABT	PspA	Pneumococcal surface protein A	NA	NA	NA	NA	NA	NA	NA	NA	NA	NA	0.00204252	16.7678	4.22443e-05	0.00101386	NA	NA
7622_5#73_PspA_17_2567	PspA_17	pspA	ABT	PspA	Pneumococcal surface protein A	NA	NA	NA	NA	NA	NA	NA	NA	NA	NA	0.00301722	12.6544	0.000374676	0.00645094	NA	NA
7622_4#35_PspA_26_3876	PspA_26	pspA	ABT	PspA	Pneumococcal surface protein A	NA	NA	NA	NA	NA	NA	NA	NA	NA	NA	0.00240544	14.5799	0.000134342	0.00283729	NA	NA
7622_5#83_PspA_30_5173	PspA_30	pspA	ABT	PspA	Pneumococcal surface protein A	NA	NA	NA	NA	NA	NA	NA	NA	NA	NA	0.0023725	9.22221	0.00239097	0.0310434	NA	NA
7001_3#2_PspC_42_1600	PspC_42	pspC	ABT	PspC	Pneumococcal surface protein C	0.465277	0.175001	6.31729	6.10607	6.15788e-07	0.000121926	NA	NA	NA	NA	0.00288782	26.6389	2.4526e-07	1.55397e-05	NA	NA
7622_5#66_PspC_18_2254	PspC_18	pspC	non-ABT	PspC	Pneumococcal surface protein C	0.347872	0.10889	4.32137	0.826882	0.000160872	0.00584373	NA	NA	NA	NA	NA	NA	NA	NA	NA	NA
7622_4#12_PspC_25_319	PspC_25	pspC	ABT	PspC	Pneumococcal surface protein C	0.311697	0.104435	3.28834	-1.78086	0.00260643	0.0474551	NA	NA	NA	NA	0.00182005	8.47023	0.00361006	0.0450262	NA	NA
7553_5#76_PspC_44_963	PspC_44	pspC	ABT	PspC	Pneumococcal surface protein C	NA	NA	NA	NA	NA	NA	NA	NA	NA	NA	0.00221597	13.0323	0.000306158	0.00538837	NA	NA
7622_5#77_CLS01289_4758	CLS01289	aatB	ABT	SBP	Amino acid ABC transporter solute-binding protein AatB	0.439957	0.155435	4.04759	0.11541	0.000342155	0.00978451	4.04794	0.176257	0.000341171	0.0236306	0.00247703	15.4281	8.57021e-05	0.001912	8.57021e-05	0.00320572
7622_5#77_CLS01210_4110	CLS01210	glnH	ABT	SBP	ABC glutamine transporter solute-binding protein GlnH	0.876859	0.40083	3.73948	-0.670402	0.000790403	0.0192615	3.74154	-0.596522	0.000784818	0.0391988	0.0064028	23.5814	1.19742e-06	4.99134e-05	1.19742e-06	7.20532e-05
7622_5#77_CLS00206_3460	CLS00206	tcyA	non-ABT	SBP	ABC amino acid transporter solute-binding protein TcyA	1.25669	0.834271	3.72814	-0.698965	0.000814903	0.0195148	3.73044	-0.624184	0.000808639	0.0391988	0.0130306	53.8529	2.16079e-13	1.71135e-10	2.16079e-13	1.49527e-10
7622_5#77_CLS00379_4480	CLS00379	aliA	ABT	SBP	ABC oligopeptide transporter solute-binding protein AliA	0.45018	0.168903	3.58504	-1.05666	0.00119513	0.0270441	NA	NA	NA	NA	0.00286794	14.4225	0.000146047	0.00300439	0.000146047	0.00505322
7622_5#77_CLS01620_3474	CLS01620	piuA	ABT	SBP	Iron ABC transporter solute-binding protein PiuA	0.478839	0.181828	3.48018	-1.31548	0.00157803	0.0343232	NA	NA	NA	NA	0.00291275	14.065	0.000176599	0.0034535	0.000176599	0.00568403
7622_5#77_CLS01216_231	CLS01216	pstS2	ABT	SBP	Phosphate ABC transporter solute-binding protein PstS2 (EC 3.6.3.27)	NA	NA	NA	NA	NA	NA	NA	NA	NA	NA	0.00537091	22.6666	1.92685e-06	6.63507e-05	1.92685e-06	0.000102568
7622_5#77_CLS00796_1564	CLS00796	fruA	non-ABT	SBP	Fructose PTS transporter IIABC transporter FruA	NA	NA	NA	NA	NA	NA	NA	NA	NA	NA	0.00640626	34.2089	4.95021e-09	8.71237e-07	4.95021e-09	7.61232e-07
7622_5#77_CLS01088_1570	CLS01088	glnPH4	ABT	SBP	Amino acid ABC transporter permease GlnPH4	NA	NA	NA	NA	NA	NA	NA	NA	NA	NA	0.00268203	13.1732	0.000283988	0.00511178	0.000283988	0.0080212
7622_5#77_CLS01641_2862	CLS01641	amiA	ABT	SBP	Oligopeptide ABC transporter solute-binding protein AmiA	NA	NA	NA	NA	NA	NA	NA	NA	NA	NA	0.00406085	22.9477	1.66468e-06	5.85966e-05	1.66468e-06	9.21565e-05
7622_5#77_CLS01314_4157	CLS01314	aliB	ABT	SBP	Oligopeptide ABC transporter solute-binding protein AliB	NA	NA	NA	NA	NA	NA	NA	NA	NA	NA	0.00170591	10.925	0.000948741	0.0146104	0.000948741	0.0222858
7622_5#77_CLS00926_4454	CLS00926	piaA	ABT	SBP	ABC iron transporter substrate-binding protein PiaA	NA	NA	NA	NA	NA	NA	NA	NA	NA	NA	0.00232695	15.0424	0.000105125	0.00228106	0.000105125	0.00382875
7622_5#77_CLS00766_5101	CLS00766	pnrA	ABT	SBP	Ribonucleoside ABC transporter solute binding protein	NA	NA	NA	NA	NA	NA	NA	NA	NA	NA	0.00253762	13.5598	0.000231082	0.00429524	0.000231082	0.00686704
7622_4#31_zmpA_11_s1_1924	zmpA_11	zmpA	ABT	ZmpA	Zinc metalloprotease A	0.587603	0.245633	6.96807	7.77994	1.04989e-07	8.31509e-05	NA	NA	NA	NA	0.00390612	30.7004	3.01104e-08	2.81303e-06	NA	NA
7553_4#7_zmpA_9_s1_311	zmpA_9	zmpA	ABT	ZmpA	Zinc metalloprotease A	0.546207	0.2232	6.58141	6.79083	2.98877e-07	0.000118355	NA	NA	NA	NA	0.00367592	28.4242	9.74381e-08	7.34962e-06	NA	NA
7622_4#31_zmpA_11_s3_628	zmpA_11	zmpA	ABT	ZmpA	Zinc metalloprotease A	0.572542	0.228498	6.61141	6.86817	2.75429e-07	0.000118355	NA	NA	NA	NA	0.00366457	23.1771	1.47749e-06	5.57225e-05	NA	NA
7622_5#67_zmpA_5_627	zmpA_5	zmpA	ABT	ZmpA	Zinc metalloprotease A	0.627892	0.254079	6.42036	6.37409	4.64092e-07	0.000121926	NA	NA	NA	NA	0.00393406	27.2773	1.76269e-07	1.21396e-05	NA	NA
7001_3#2_zmpA_15_s2_2897	zmpA_15	zmpA	ABT	ZmpA	Zinc metalloprotease A	0.522476	0.201191	6.34593	6.18064	5.69198e-07	0.000121926	NA	NA	NA	NA	0.00333354	26.435	2.7255e-07	1.62408e-05	NA	NA
7622_5#92_zmpA_12_s2_638	zmpA_12	zmpA	ABT	ZmpA	Zinc metalloprotease A	0.512952	0.194899	6.14206	5.64821	9.9799e-07	0.000175646	NA	NA	NA	NA	0.00315466	23.6692	1.14398e-06	4.89749e-05	NA	NA
7622_5#56_zmpA_3_s2_3867	zmpA_3	zmpA	ABT	ZmpA	Zinc metalloprotease A	0.89159	0.369491	5.96021	5.17043	1.65119e-06	0.000261548	NA	NA	NA	NA	0.00613026	33.3192	7.82073e-09	1.2388e-06	NA	NA
7622_5#74_zmpA_17_s2_1933	zmpA_17	zmpA	ABT	ZmpA	Zinc metalloprotease A	0.502078	0.200699	5.73737	4.58189	3.06907e-06	0.000441946	NA	NA	NA	NA	0.00317862	24.2047	8.66203e-07	3.92019e-05	NA	NA
7622_4#38_zmpA_1_s2_1594	zmpA_1	zmpA	ABT	ZmpA	Zinc metalloprotease A	0.815529	0.385311	5.68715	4.44887	3.53053e-06	0.000466029	NA	NA	NA	NA	0.00610744	30.6953	3.01903e-08	2.81303e-06	NA	NA
7622_5#56_zmpA_3_1275	zmpA_3	zmpA	ABT	ZmpA	Zinc metalloprotease A	0.574577	0.208622	5.6226	4.27773	4.22762e-06	0.000505579	NA	NA	NA	NA	0.00334884	23.4029	1.3138e-06	5.33604e-05	NA	NA
7622_5#96_zmpA_14_s1_3871	zmpA_14	zmpA	ABT	ZmpA	Zinc metalloprotease A	0.405943	0.199023	5.57808	4.15957	4.78768e-06	0.000505579	NA	NA	NA	NA	0.0029248	25.3154	4.8681e-07	2.57036e-05	NA	NA
7622_4#38_zmpA_1_s1_2562	zmpA_1	zmpA	ABT	ZmpA	Zinc metalloprotease A	0.581366	0.232536	5.49158	3.92978	6.09803e-06	0.000568193	NA	NA	NA	NA	0.00361405	22.1313	2.5463e-06	8.40278e-05	NA	NA
7622_5#67_zmpA_5_s1_3219	zmpA_5	zmpA	ABT	ZmpA	Zinc metalloprotease A	0.513478	0.212071	5.31026	3.44746	1.01328e-05	0.000802514	NA	NA	NA	NA	0.00332476	23.1911	1.46676e-06	5.57225e-05	NA	NA
7622_5#96_zmpA_14_s2_1279	zmpA_14	zmpA	ABT	ZmpA	Zinc metalloprotease A	0.74964	0.351373	5.12578	2.95626	1.69974e-05	0.00107695	NA	NA	NA	NA	0.00568962	26.3347	2.87084e-07	1.62408e-05	NA	NA
6999_3#11_zmpA_13_s2_2572	zmpA_13	zmpA	ABT	ZmpA	Zinc metalloprotease A	0.797901	0.275593	5.00172	2.62597	2.40713e-05	0.0014665	NA	NA	NA	NA	0.00455612	19.7503	8.82493e-06	0.000254681	NA	NA
7622_5#74_zmpA_17_s1_3229	zmpA_17	zmpA	ABT	ZmpA	Zinc metalloprotease A	0.612079	0.254657	4.8781	2.29721	3.40398e-05	0.001997	NA	NA	NA	NA	0.00401424	18.164	2.02677e-05	0.000553517	NA	NA
7622_4#39_zmpA_4_s2_1913	zmpA_4	zmpA	ABT	ZmpA	Zinc metalloprotease A	0.480891	0.221672	4.77058	2.01165	4.60017e-05	0.00242889	NA	NA	NA	NA	0.00337708	22.9694	1.64602e-06	5.85966e-05	NA	NA
7622_5#77_zmpA_7_s1_2220	zmpA_7	zmpA	ABT	ZmpA	Zinc metalloprotease A	0.35738	0.12327	4.68145	1.77539	5.90262e-05	0.0029218	NA	NA	NA	NA	0.00178701	10.0317	0.00153871	0.0217618	NA	NA
7622_4#10_zmpA_6_s1_2898	zmpA_6	zmpA	ABT	ZmpA	Zinc metalloprotease A	0.539242	0.239109	4.66044	1.71977	6.25955e-05	0.00300458	NA	NA	NA	NA	0.0034169	18.6902	1.53774e-05	0.000427329	NA	NA
7622_4#39_zmpA_4_s1_1912	zmpA_4	zmpA	ABT	ZmpA	Zinc metalloprotease A	0.352338	0.172685	4.55629	1.44445	8.37176e-05	0.00358402	NA	NA	NA	NA	0.00235093	15.2571	9.38235e-05	0.00206412	NA	NA
7553_4#7_zmpA_9_s2_2904	zmpA_9	zmpA	ABT	ZmpA	Zinc metalloprotease A	0.654905	0.241118	4.56406	1.46497	8.19219e-05	0.00358402	NA	NA	NA	NA	0.00426626	21.4967	3.5444e-06	0.000112287	NA	NA
7622_5#92_zmpA_12_s3_1934	zmpA_12	zmpA	ABT	ZmpA	Zinc metalloprotease A	0.451459	0.173313	4.52141	1.35243	9.2267e-05	0.00384608	NA	NA	NA	NA	0.00304858	17.9677	2.24681e-05	0.000593157	NA	NA
7001_3#2_zmpA_15_s1_304	zmpA_15	zmpA	ABT	ZmpA	Zinc metalloprotease A	0.521901	0.215727	4.43757	1.13169	0.000116518	0.00473241	NA	NA	NA	NA	0.0029993	18.1061	2.08929e-05	0.00056092	NA	NA
6930_8#17_zmpA_2_s1_2248	zmpA_2	zmpA	ABT	ZmpA	Zinc metalloprotease A	0.347302	0.146683	4.3952	1.02037	0.00013108	0.00494807	NA	NA	NA	NA	0.00200834	11.7246	0.000616807	0.0101773	NA	NA
7622_5#56_zmpA_3_s3_1274	zmpA_3	zmpA	ABT	ZmpA	Zinc metalloprotease A	0.50217	0.258343	4.29657	0.762015	0.000172311	0.00593351	NA	NA	NA	NA	0.00406986	21.3085	3.9099e-06	0.000121437	NA	NA
7622_5#73_zmpA_10_s2_2568	zmpA_10	zmpA	ABT	ZmpA	Zinc metalloprotease A	0.887649	0.384126	4.27525	0.706336	0.000182781	0.00616009	NA	NA	NA	NA	0.00646049	25.5284	4.3591e-07	2.38097e-05	NA	NA
7622_5#73_zmpA_10_s3_5160	zmpA_10	zmpA	ABT	ZmpA	Zinc metalloprotease A	0.805925	0.31574	4.21892	0.559445	0.00021357	0.00690397	NA	NA	NA	NA	0.00536847	23.191	1.46679e-06	5.57225e-05	NA	NA
7622_4#8_zmpA_0_s1_943	zmpA_0	zmpA	ABT	ZmpA	Zinc metalloprotease A	0.350616	0.16677	4.21043	0.537325	0.000218638	0.00692644	NA	NA	NA	NA	NA	NA	NA	NA	NA	NA
6999_3#11_zmpA_13_s1_5164	zmpA_13	zmpA	ABT	ZmpA	Zinc metalloprotease A	0.355509	0.190955	4.10162	0.254956	0.000295015	0.00916282	NA	NA	NA	NA	0.00278829	16.5475	4.74464e-05	0.00110522	NA	NA
7622_5#92_zmpA_12_s1_3230	zmpA_12	zmpA	ABT	ZmpA	Zinc metalloprotease A	0.821403	0.421467	4.0436	0.10512	0.000345917	0.00978451	NA	NA	NA	NA	0.00674313	28.6095	8.85464e-08	7.31949e-06	NA	NA
7001_3#2_zmpA_15_s3_4193	zmpA_15	zmpA	ABT	ZmpA	Zinc metalloprotease A	0.218629	0.0342822	3.87185	-0.335077	0.000552627	0.0148366	NA	NA	NA	NA	NA	NA	NA	NA	NA	NA
7622_5#73_zmpA_10_s1_1271	zmpA_10	zmpA	ABT	ZmpA	Zinc metalloprotease A	0.461584	0.189753	3.85579	-0.375939	0.000577231	0.0150695	NA	NA	NA	NA	0.00290887	13.9277	0.000189978	0.00366982	NA	NA
7622_4#38_zmpA_1_s3_1266	zmpA_1	zmpA	ABT	ZmpA	Zinc metalloprotease A	0.828826	0.428798	3.66214	-0.864543	0.000972801	0.0226605	NA	NA	NA	NA	0.00712277	28.1916	1.0988e-07	7.91133e-06	NA	NA
6925_1#52_zmpA_8_s3_934	zmpA_8	zmpA	non-ABT	ZmpA	Zinc metalloprotease A	NA	NA	NA	NA	NA	NA	NA	NA	NA	NA	0.00348501	16.9418	3.85441e-05	0.00096911	NA	NA
7622_4#8_zmpA_0_s2_944	zmpA_0	zmpA	ABT	ZmpA	Zinc metalloprotease A	NA	NA	NA	NA	NA	NA	NA	NA	NA	NA	0.00220294	12.7581	0.000354465	0.00617003	NA	NA
6930_8#17_zmpA_2_s3_952	zmpA_2	zmpA	ABT	ZmpA	Zinc metalloprotease A	NA	NA	NA	NA	NA	NA	NA	NA	NA	NA	0.00153643	8.92792	0.00280844	0.0355885	NA	NA
7622_5#56_zmpA_3_s1_2570	zmpA_3	zmpA	ABT	ZmpA	Zinc metalloprotease A	0.454303	0.16991	4.06097	0.149927	0.000329832	0.00967509	NA	NA	NA	NA	0.00271203	14.5081	0.000139557	0.00290867	NA	NA
7001_1#11_zmpA_16_s1_4195	zmpA_16	zmpA	ABT	ZmpA	Zinc metalloprotease A	NA	NA	NA	NA	NA	NA	NA	NA	NA	NA	0.00340281	9.39124	0.00218024	0.0287792	NA	NA
7553_4#7_zmpA_9_s3_4200	zmpA_9	zmpA	ABT	ZmpA	Zinc metalloprotease A	NA	NA	NA	NA	NA	NA	NA	NA	NA	NA	0.00177994	9.96739	0.00159338	0.0223355	NA	NA
7622_4#10_zmpA_6_4516	zmpA_6	zmpA	ABT	ZmpA	Zinc metalloprotease A	NA	NA	NA	NA	NA	NA	NA	NA	NA	NA	0.00293677	9.20202	0.00241748	0.0311324	NA	NA
7622_4#8_zmpB_3_s3_4831	zmpB_3	zmpB	ABT	ZmpB	Zinc metalloprotease B	0.210558	-0.000559116	3.41923	-1.46454	0.00185261	0.0376221	NA	NA	NA	NA	NA	NA	NA	NA	NA	NA
7622_4#8_zmpB_3_s2_2240	zmpB_3	zmpB	ABT	ZmpB	Zinc metalloprotease B	NA	NA	NA	NA	NA	NA	NA	NA	NA	NA	0.00491604	14.1112	0.000172315	0.00341184	NA	NA
7622_4#38_zmpB_6_s2_2890	zmpB_6	zmpB	ABT	ZmpB	Zinc metalloprotease B	NA	NA	NA	NA	NA	NA	NA	NA	NA	NA	0.00243787	11.684	0.000630388	0.0102942	NA	NA
7622_4#8_zmpB_3_3537	zmpB_3	zmpB	ABT	ZmpB	Zinc metalloprotease B	NA	NA	NA	NA	NA	NA	NA	NA	NA	NA	0.0012995	9.33727	0.0022454	0.0293943	NA	NA
