# Supplementary figures and images for: Panproteome-wide analysis of antibody responses to whole cell pneumococcal vaccination
Source: eLife journal article supplement (doi:10.7554/elife.37015), 2018-12-28

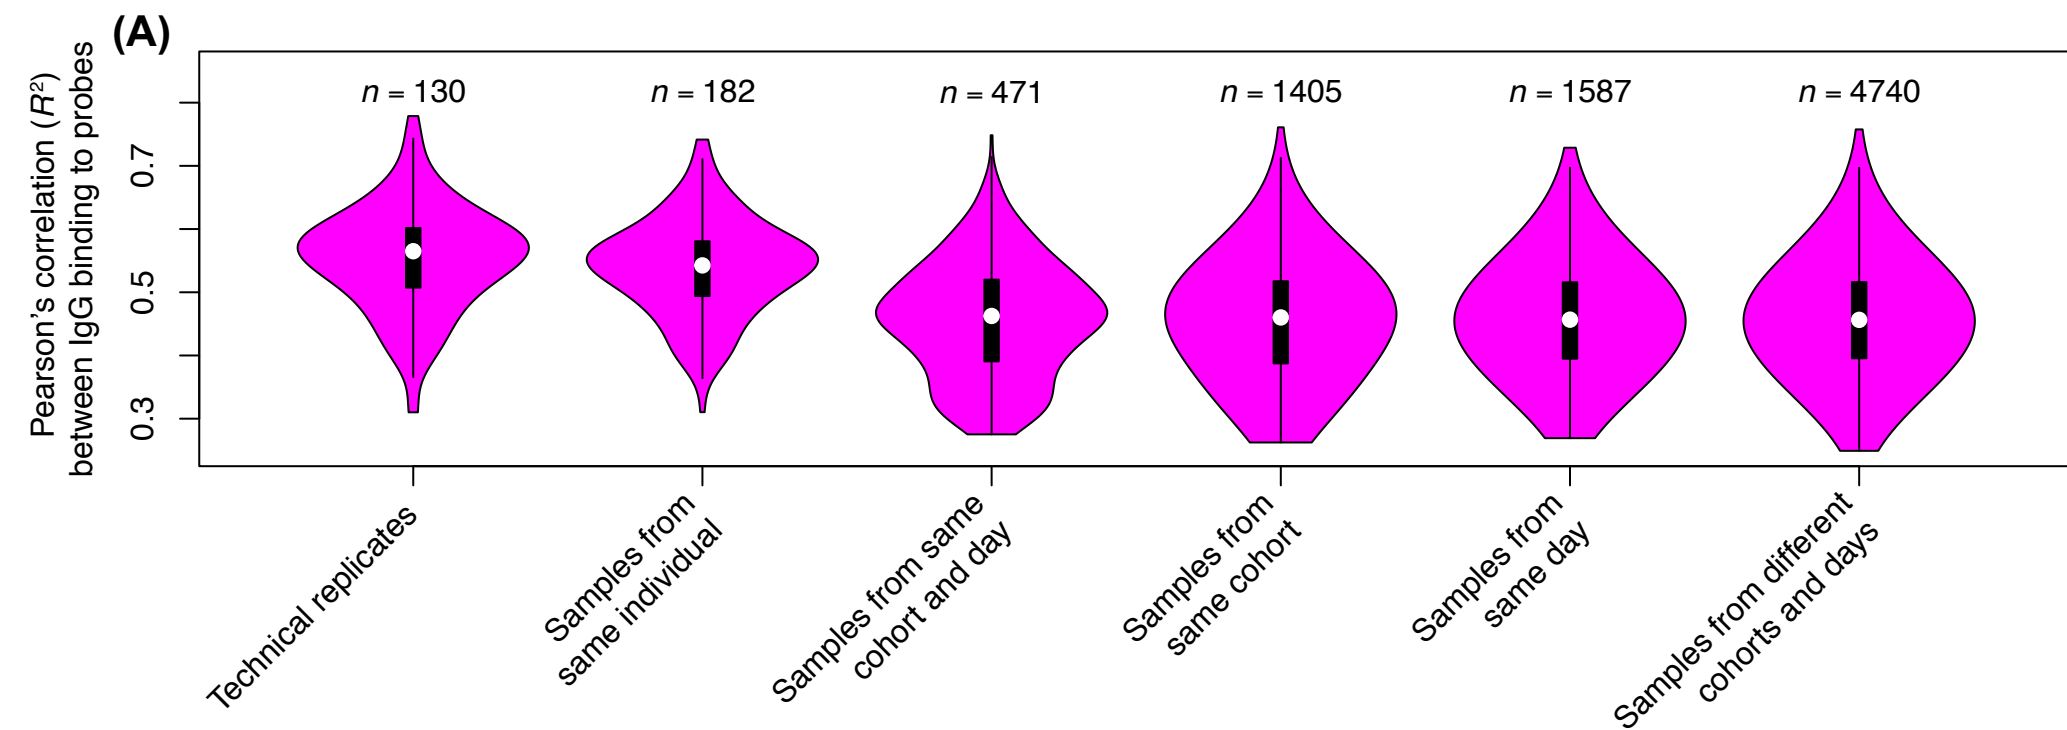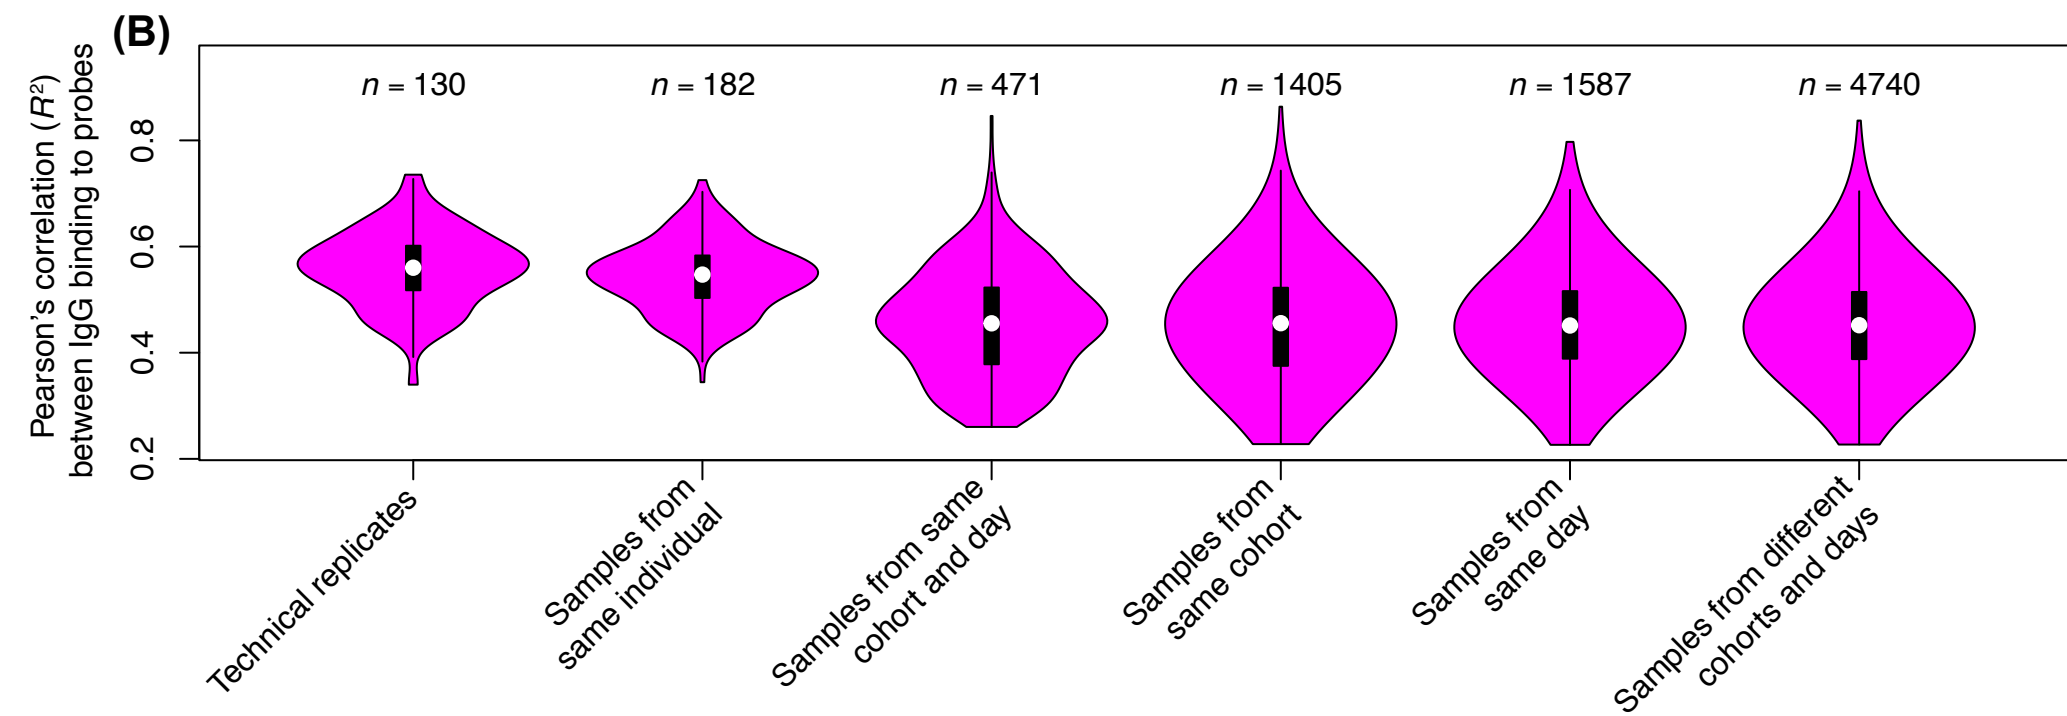

Supplement: supp [file elife_poa_e37015_Figure_2_figure_supplement_1.pdf › elife_poa_e37015_Figure_2_figure_supplement_1.pdf]

Figure 2-figure supplement 2

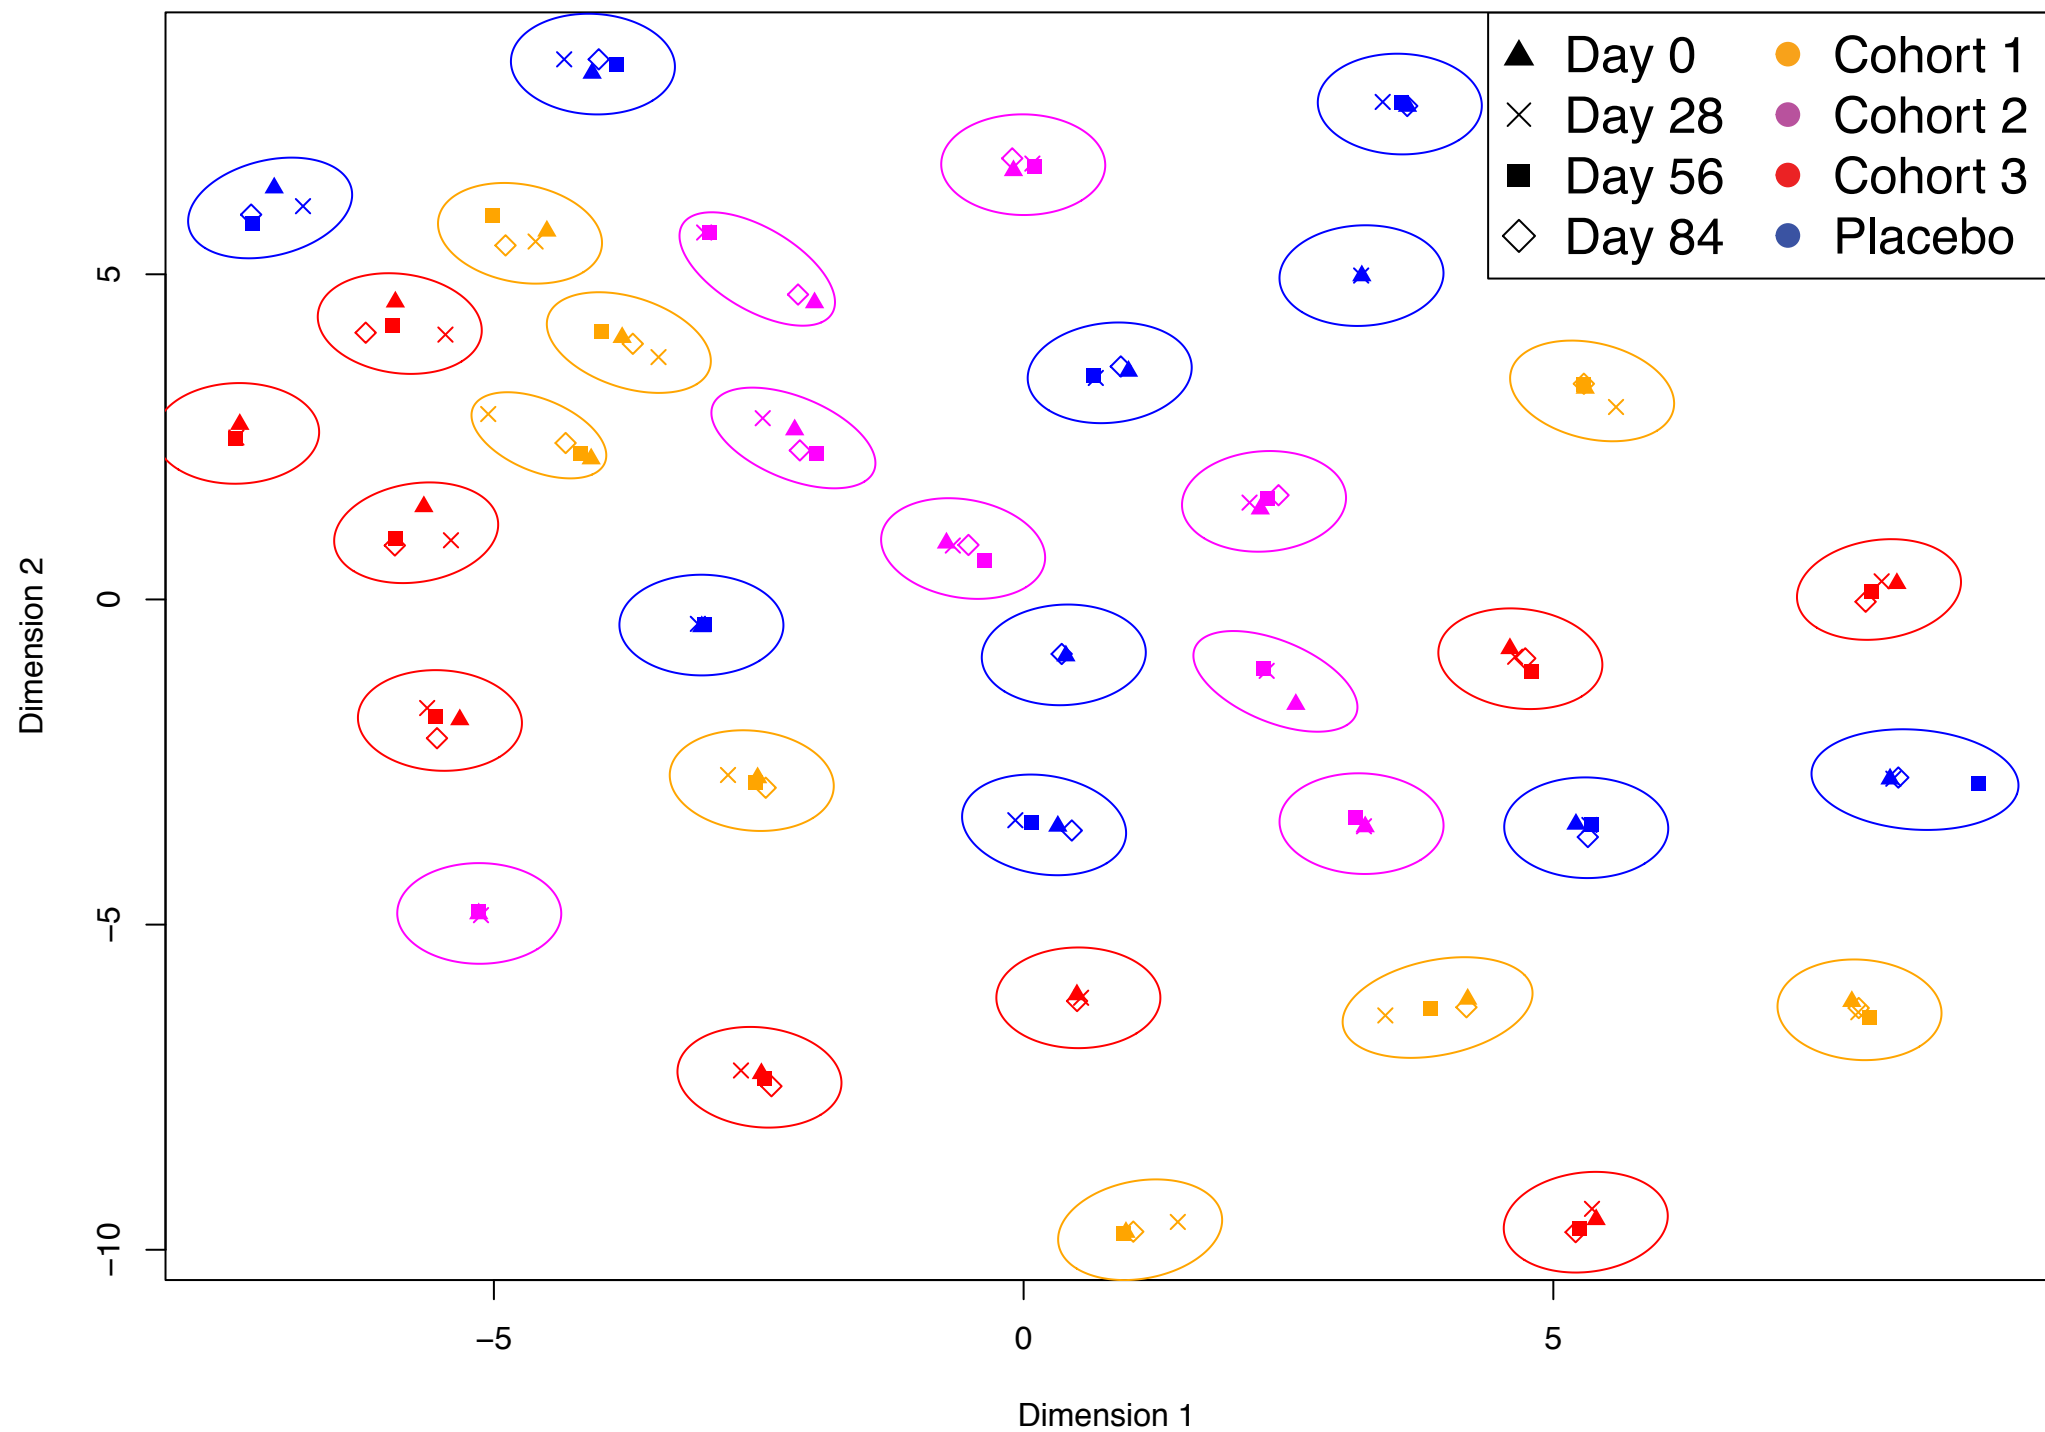

Supplement: supp [file elife_poa_e37015_Figure_2_figure_supplement_2.pdf › elife_poa_e37015_Figure_2_figure_supplement_2.pdf]

Figure 2-figure supplement 3

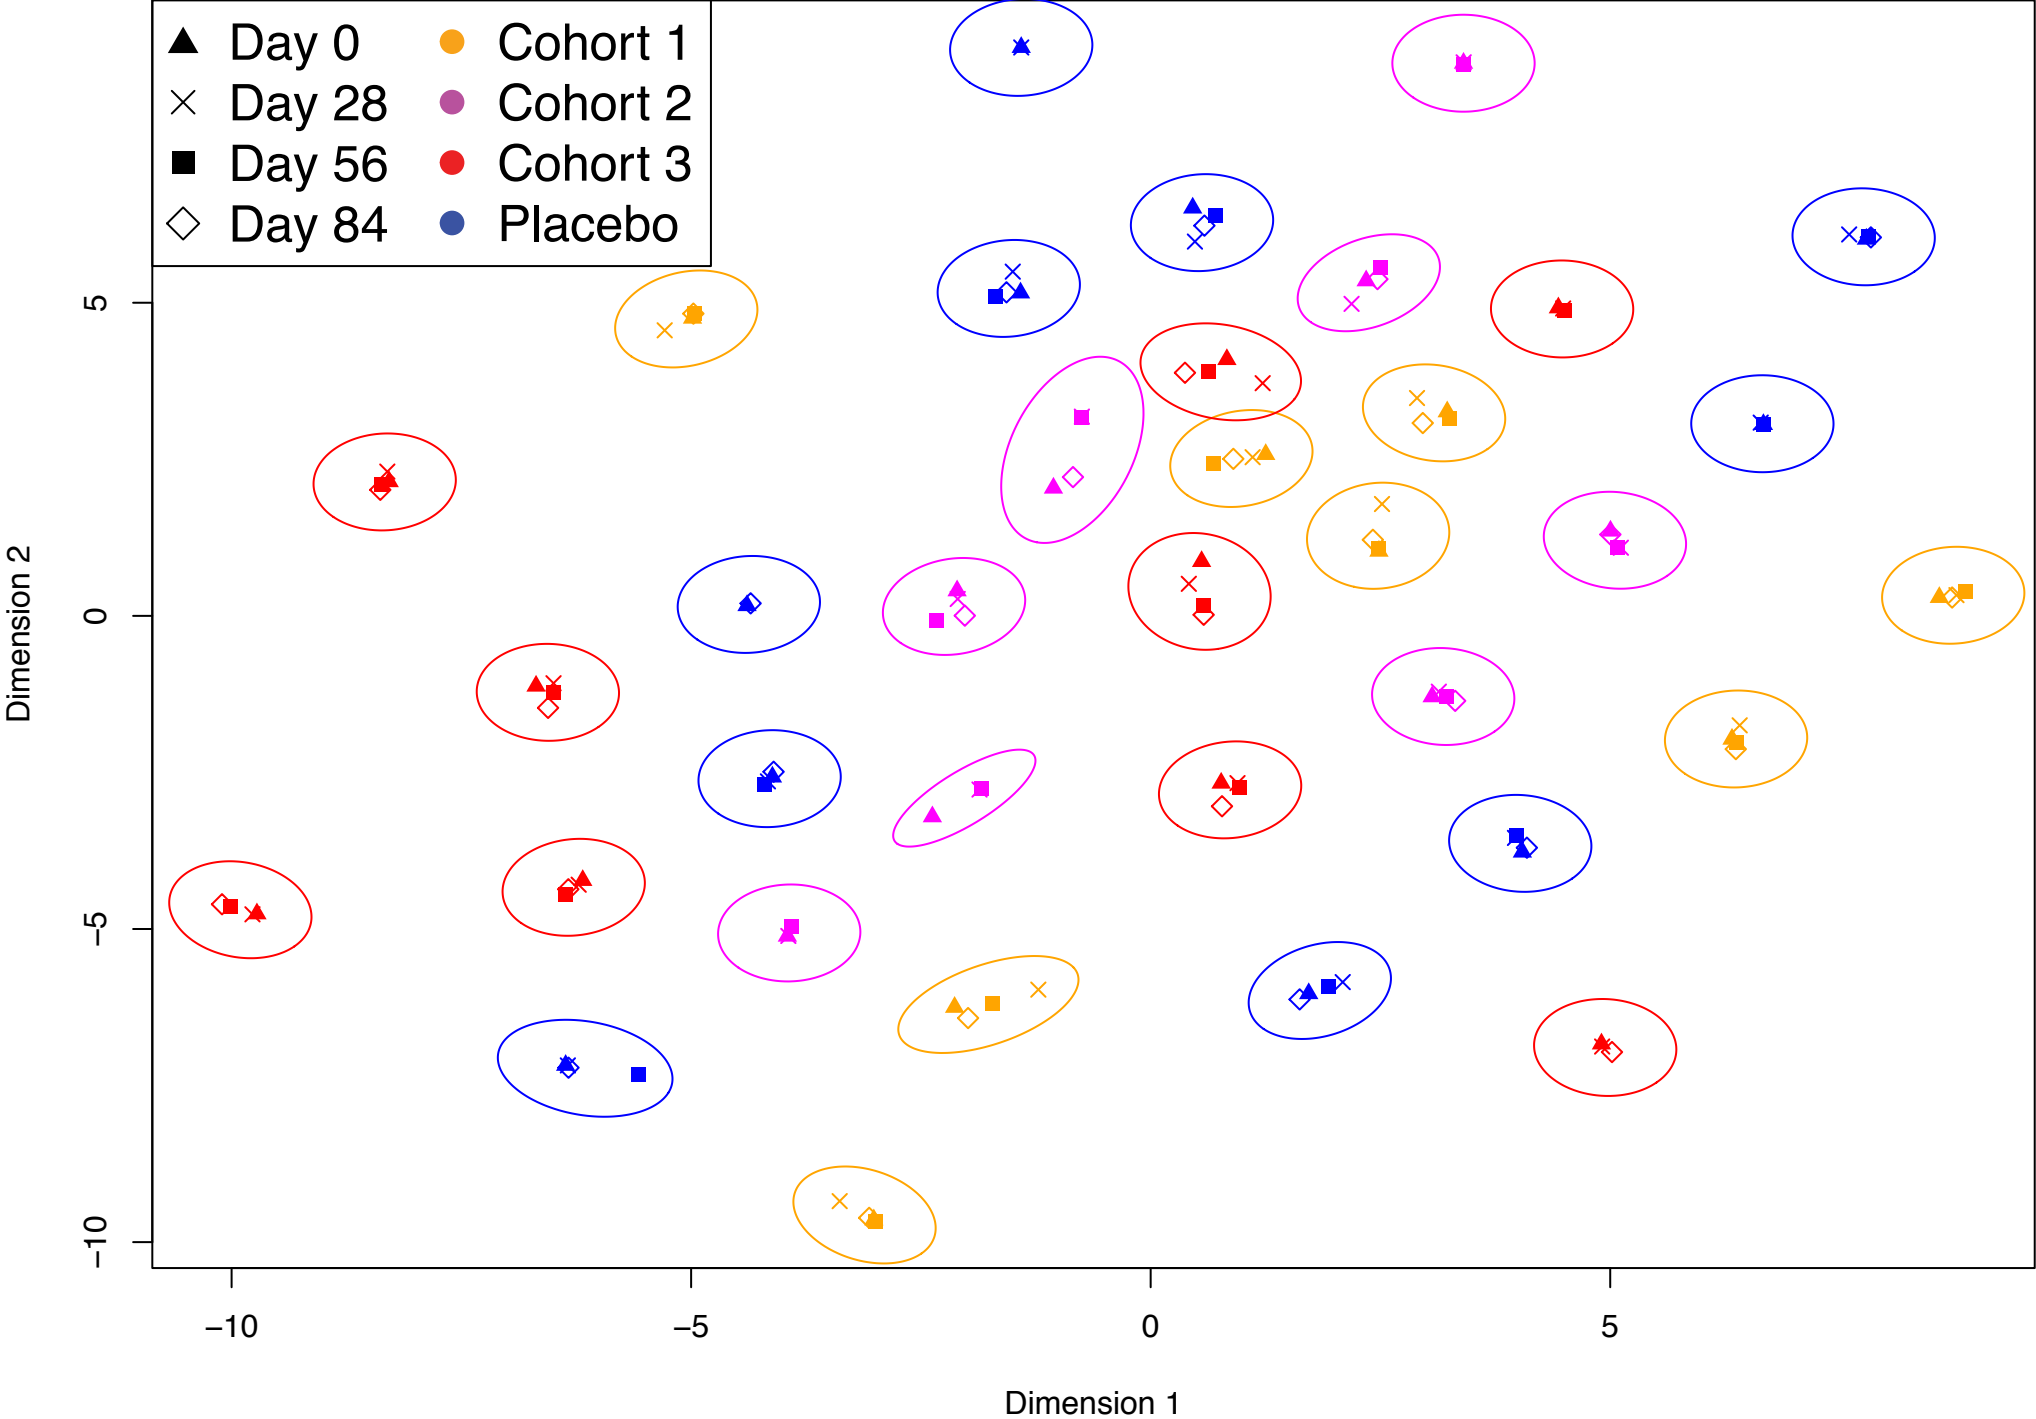

Supplement: supp [file elife_poa_e37015_Figure_2_figure_supplement_3.pdf › elife_poa_e37015_Figure_2_figure_supplement_3.pdf]

Figure 4-figure supplement 1

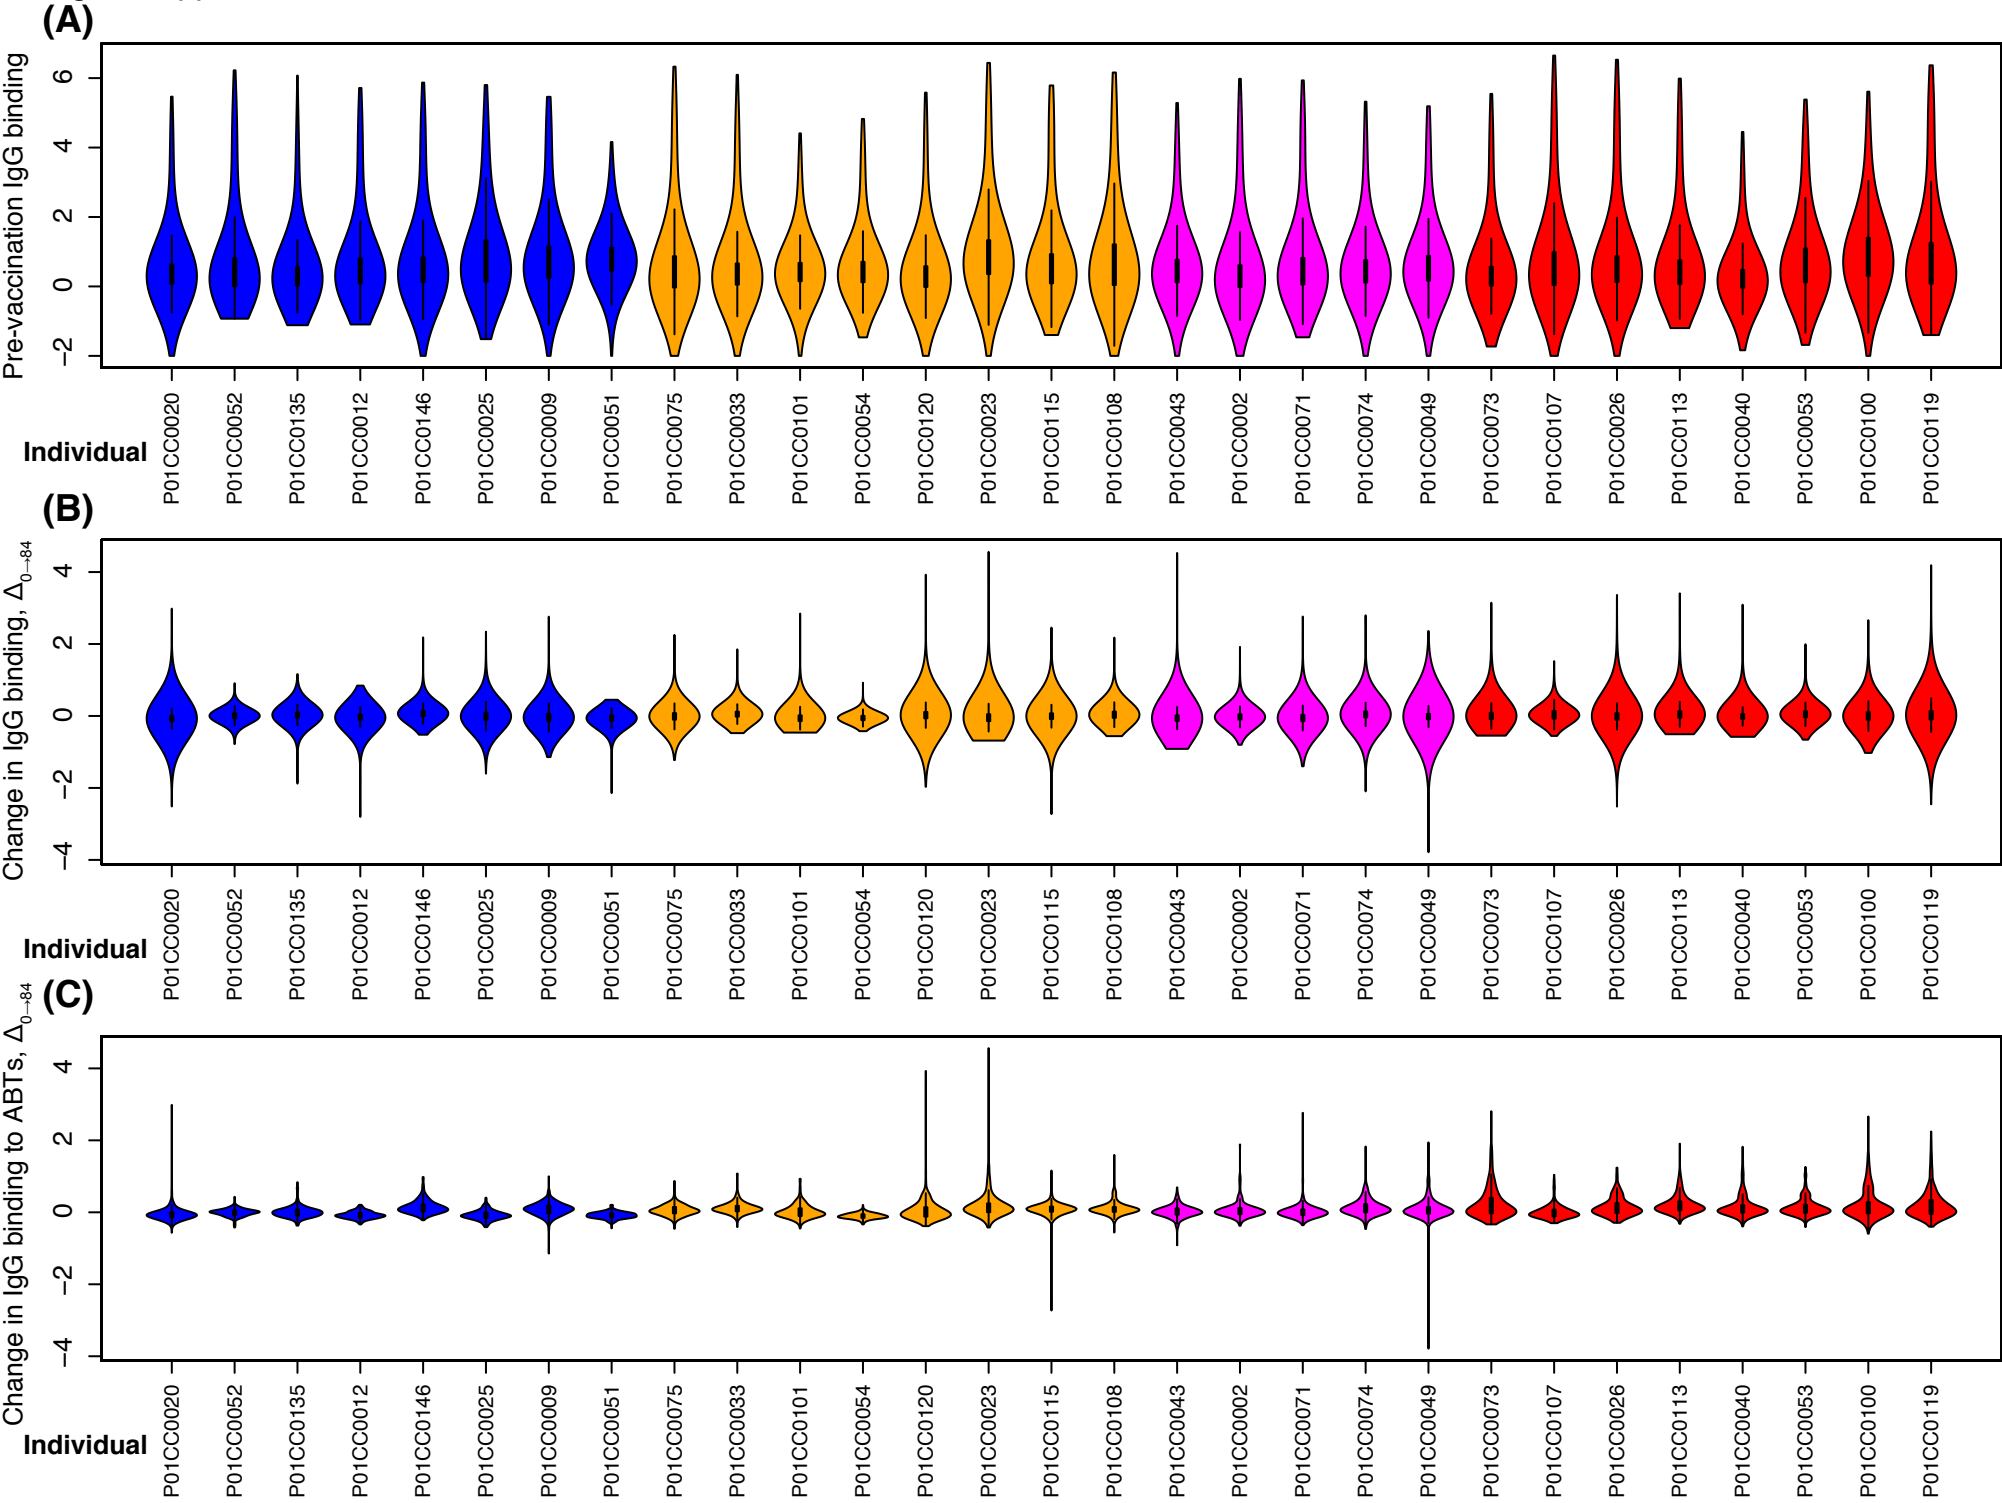

Supplement: supp [file elife_poa_e37015_Figure_4_figure_supplement_1.pdf › elife_poa_e37015_Figure_4_figure_supplement_1.pdf]

Figure 4-figure supplement 10

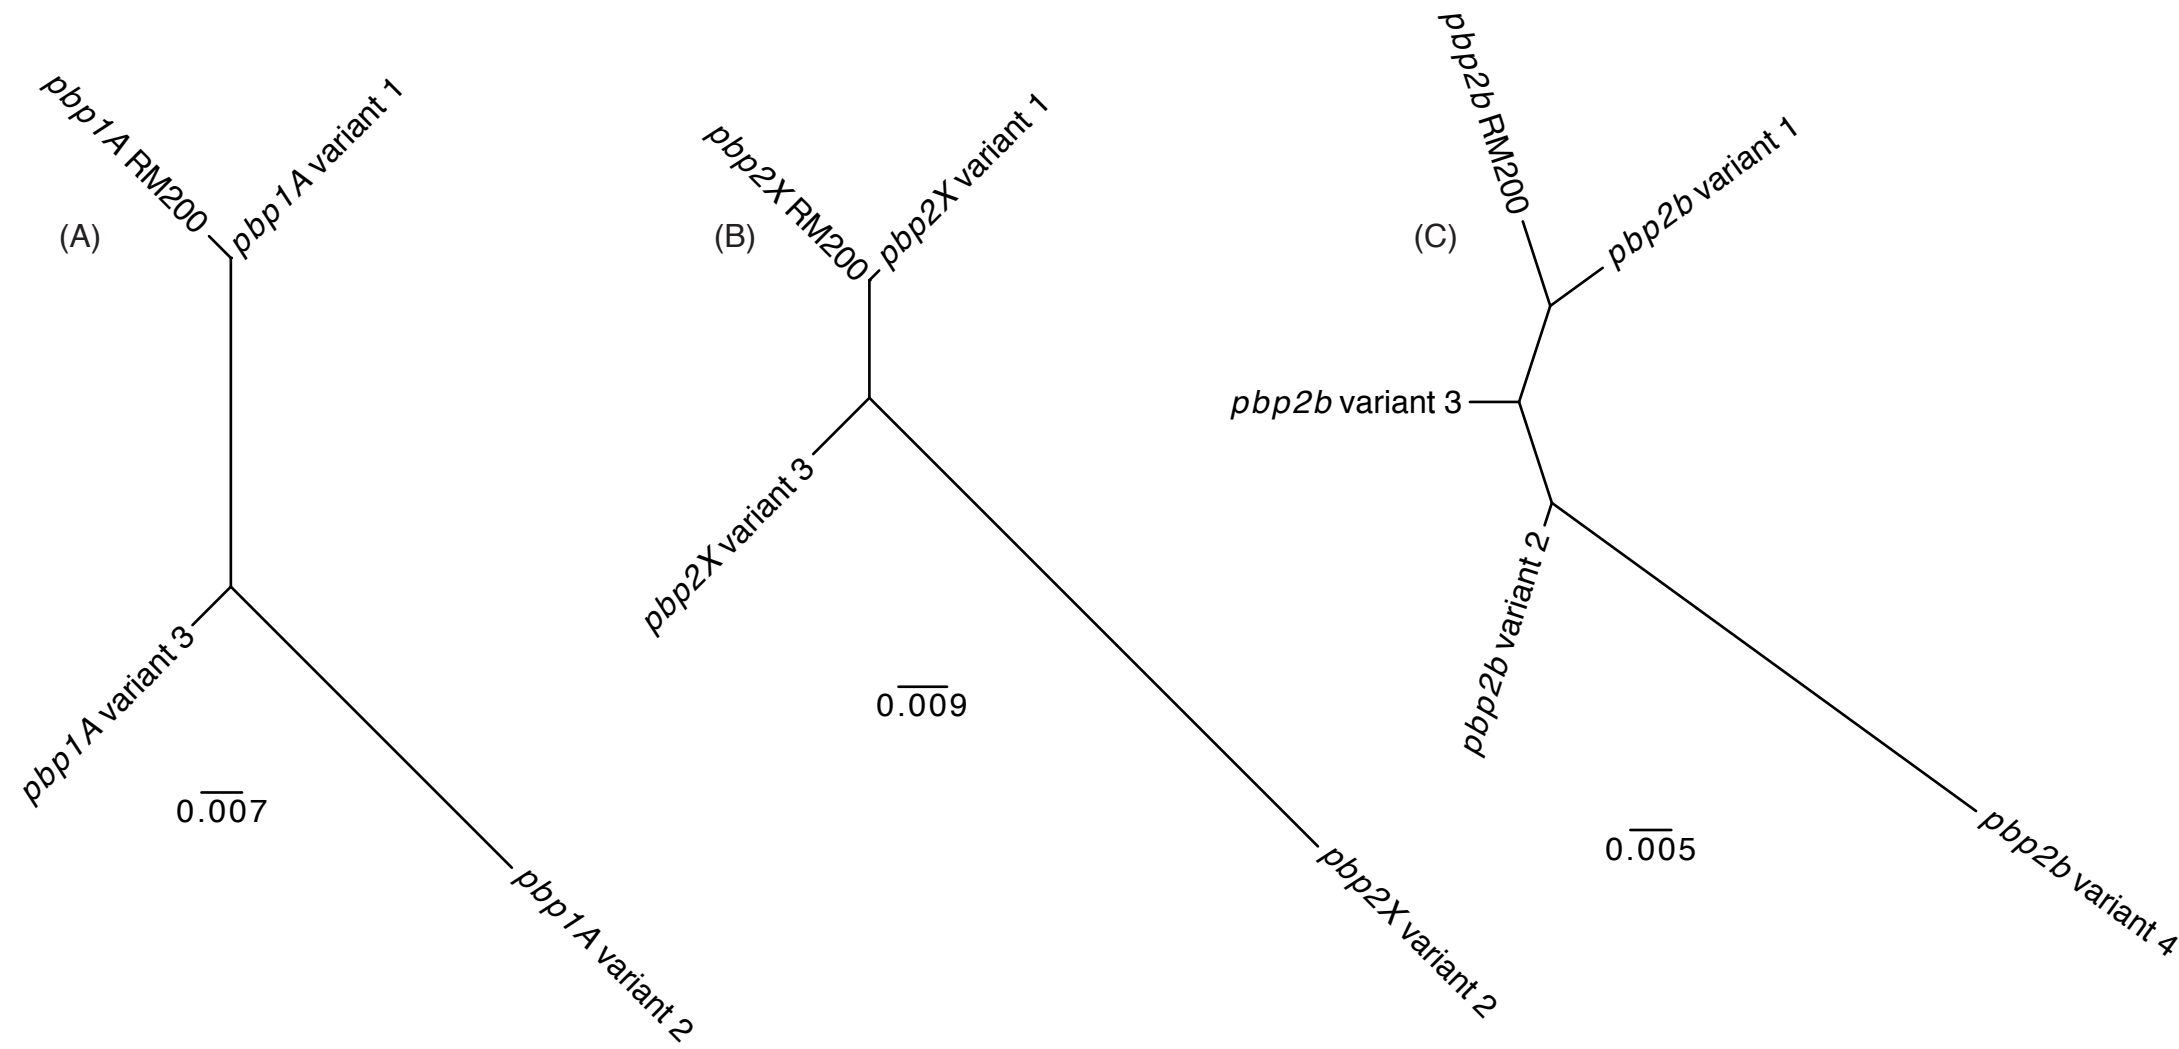

Supplement: supp [file elife_poa_e37015_Figure_4_figure_supplement_10.pdf › elife_poa_e37015_Figure_4_figure_supplement_10.pdf]

Figure 4-figure supplement 11

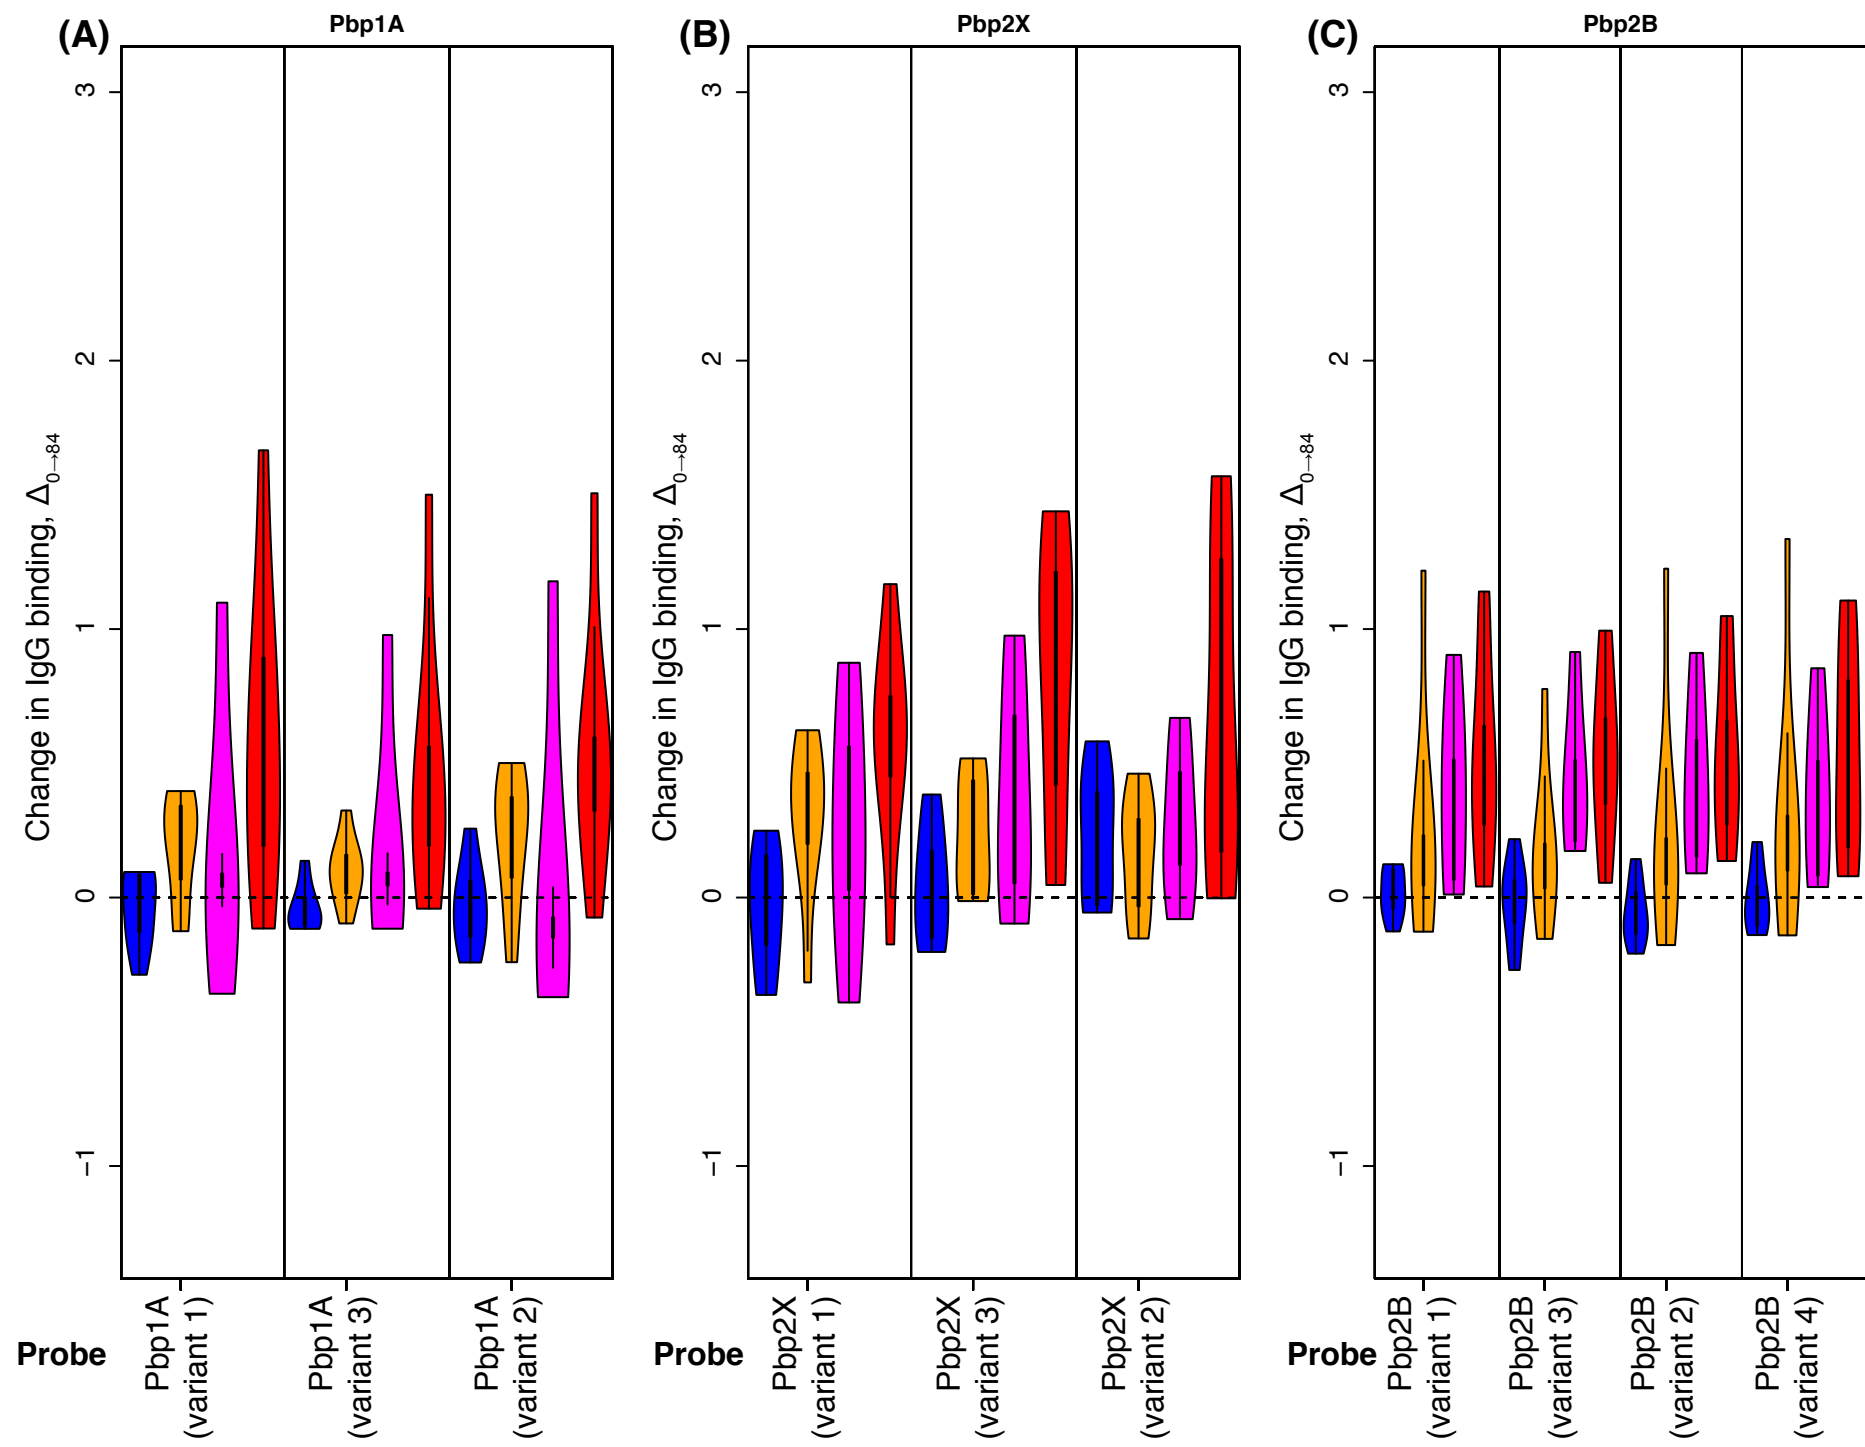

Supplement: supp [file elife_poa_e37015_Figure_4_figure_supplement_11.pdf › elife_poa_e37015_Figure_4_figure_supplement_11.pdf]

Figure 4-figure supplement 12

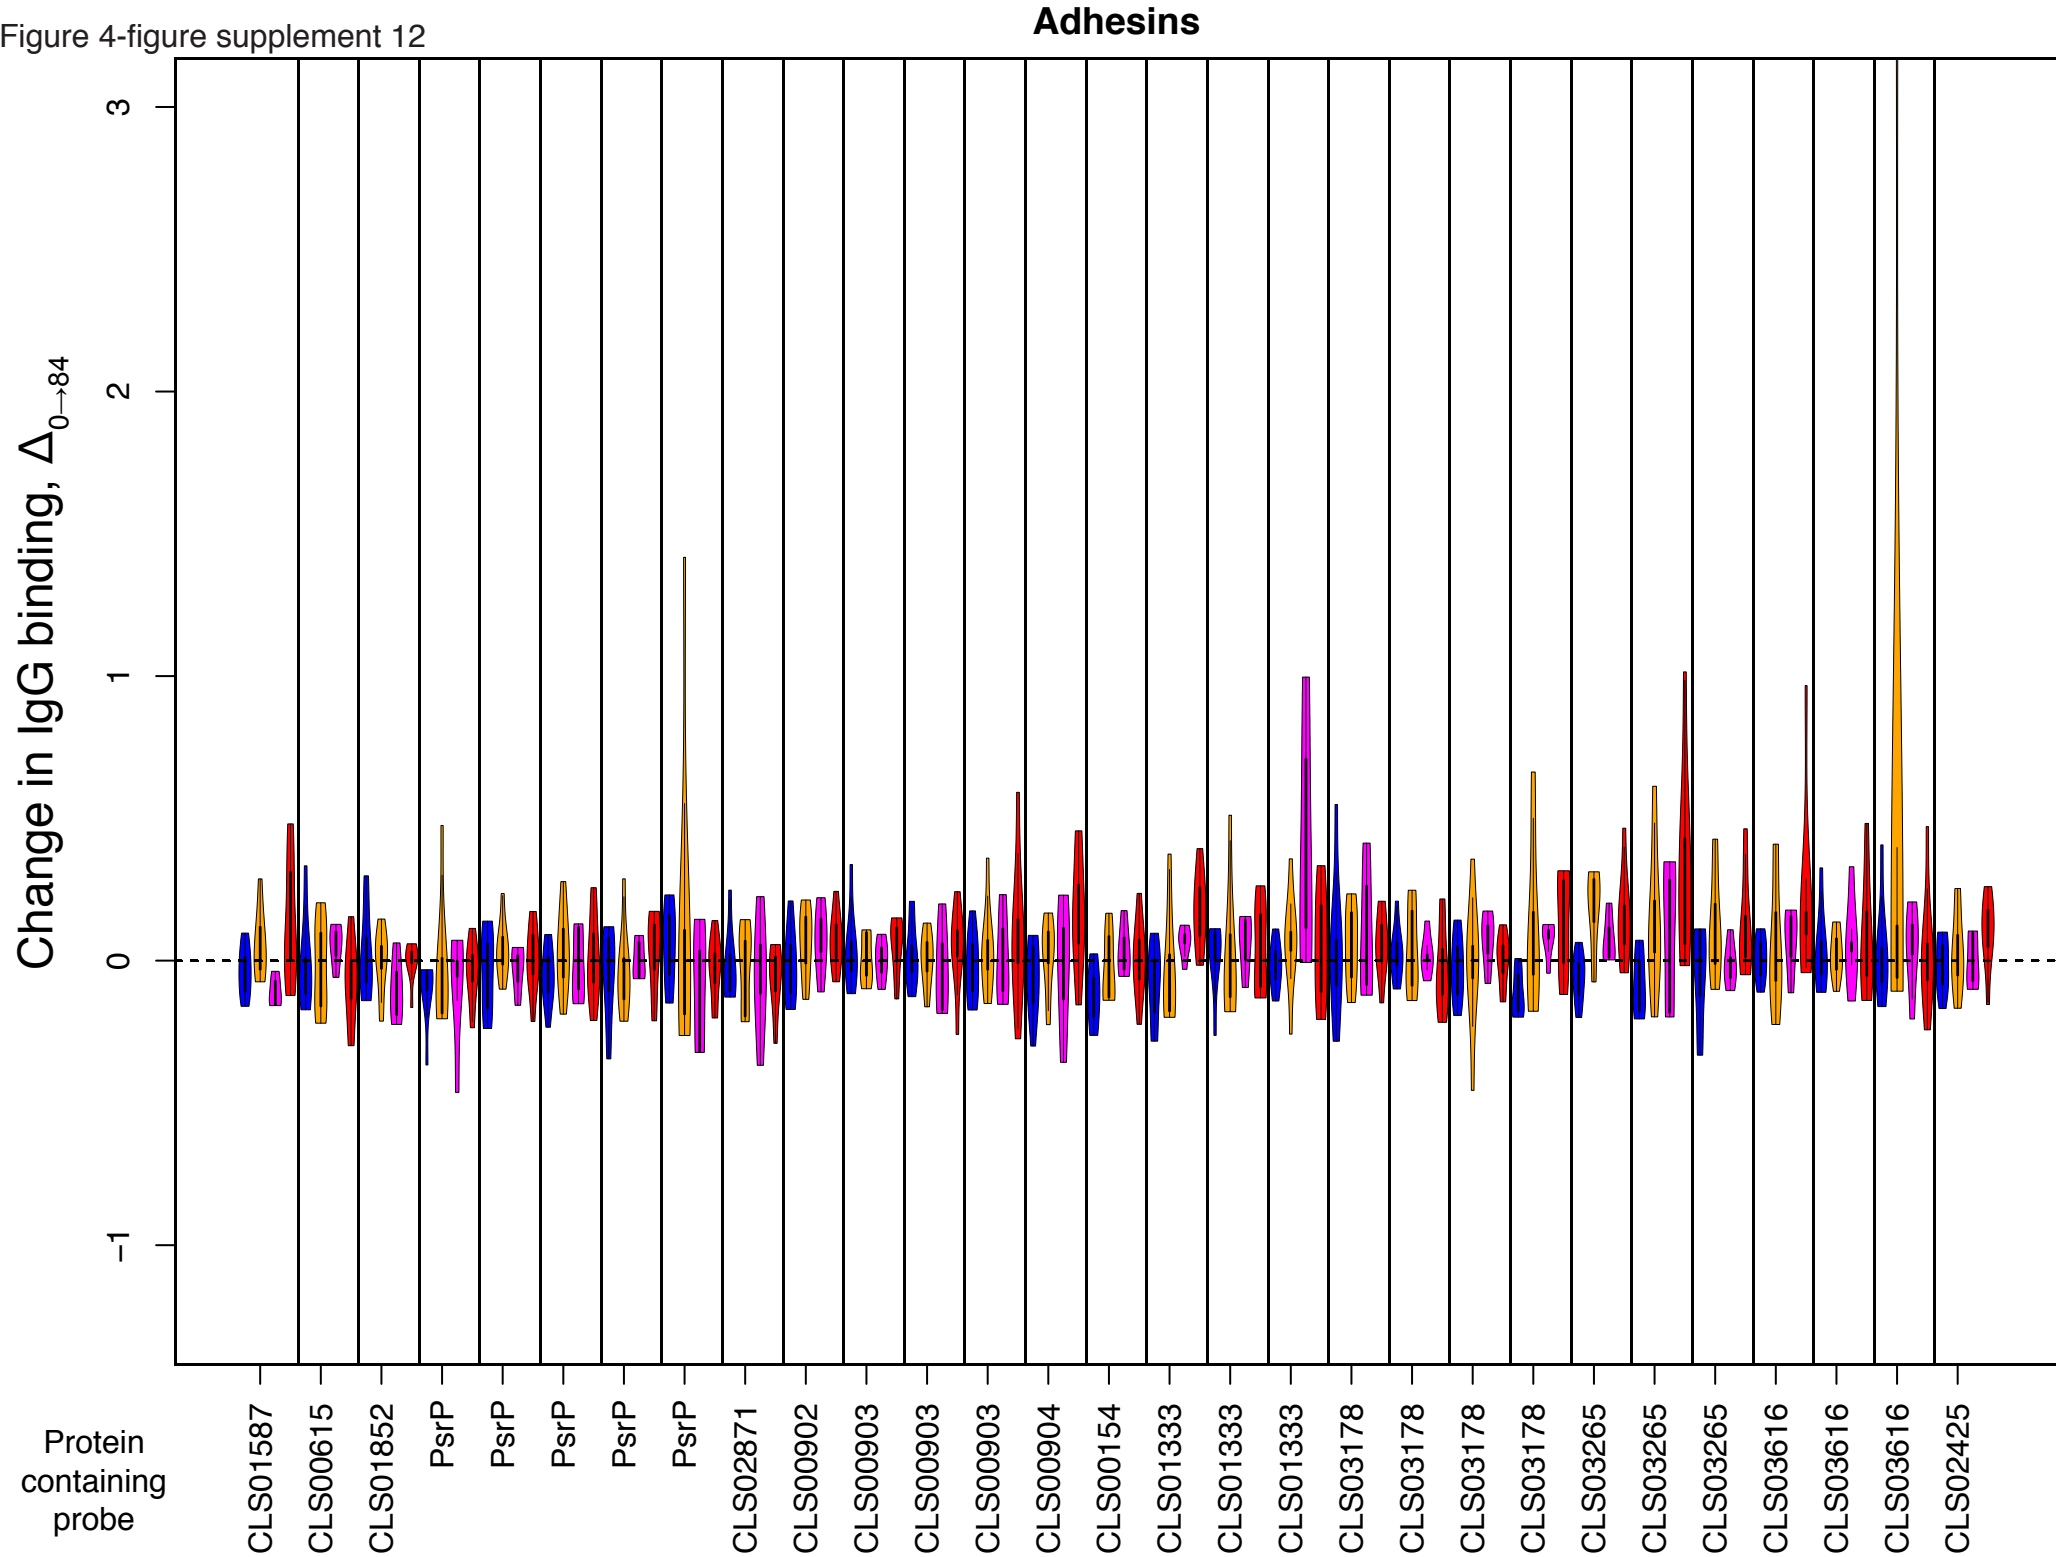

Supplement: supp [file elife_poa_e37015_Figure_4_figure_supplement_12.pdf › elife_poa_e37015_Figure_4_figure_supplement_12.pdf]

Figure 4-figure supplement 13

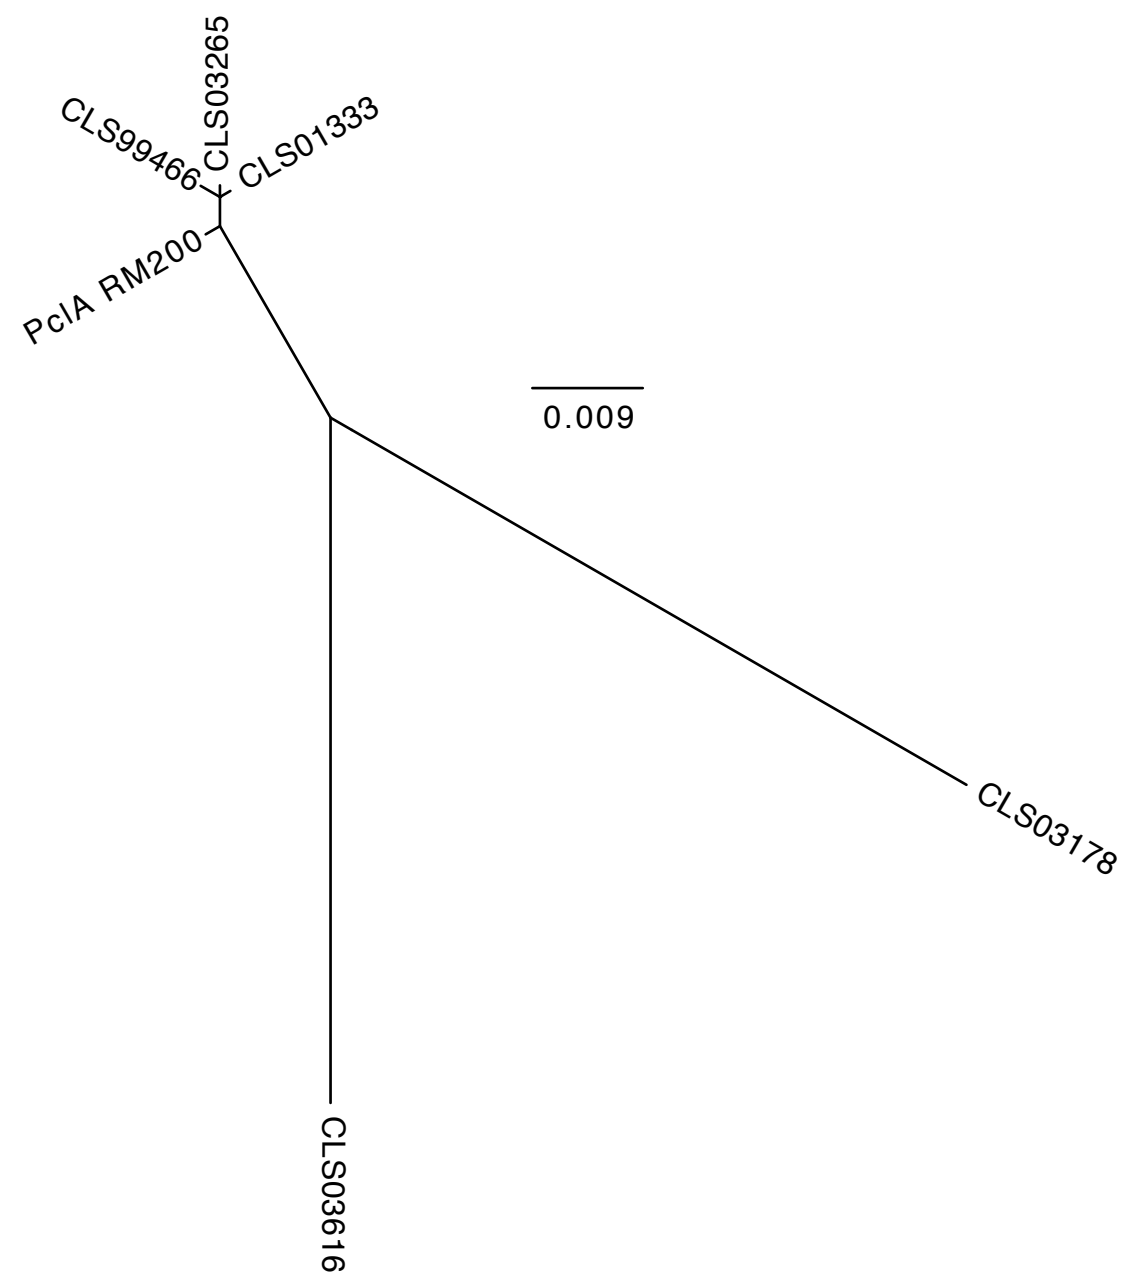

Supplement: supp [file elife_poa_e37015_Figure_4_figure_supplement_13.pdf › elife_poa_e37015_Figure_4_figure_supplement_13.pdf]

Figure 4-figure supplement 14

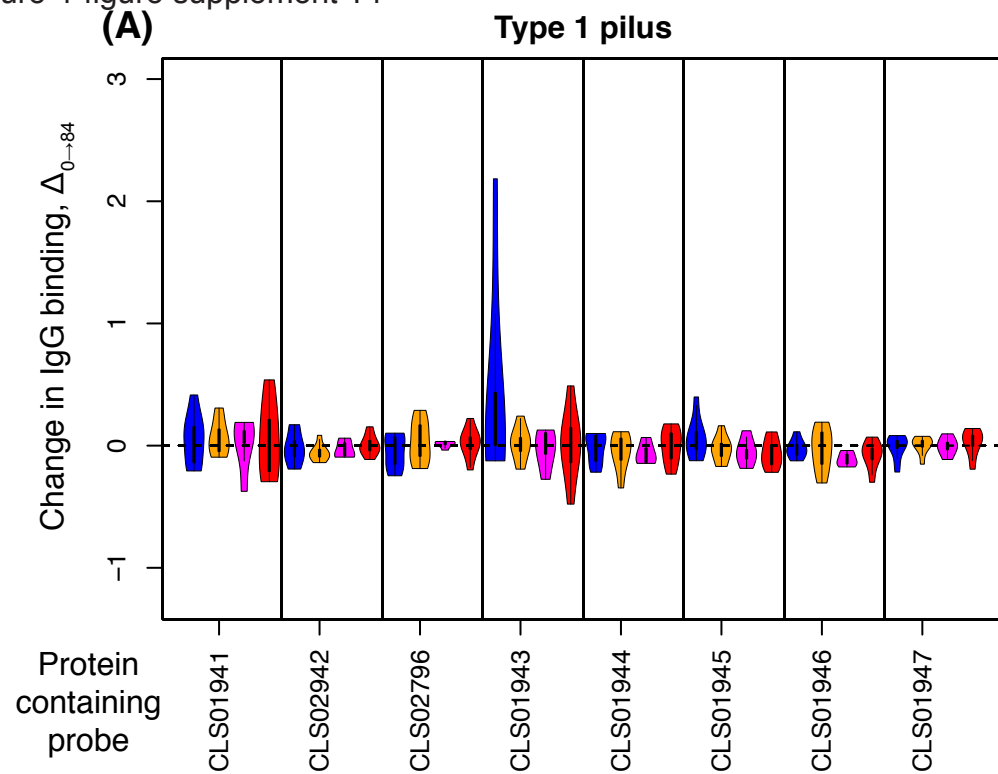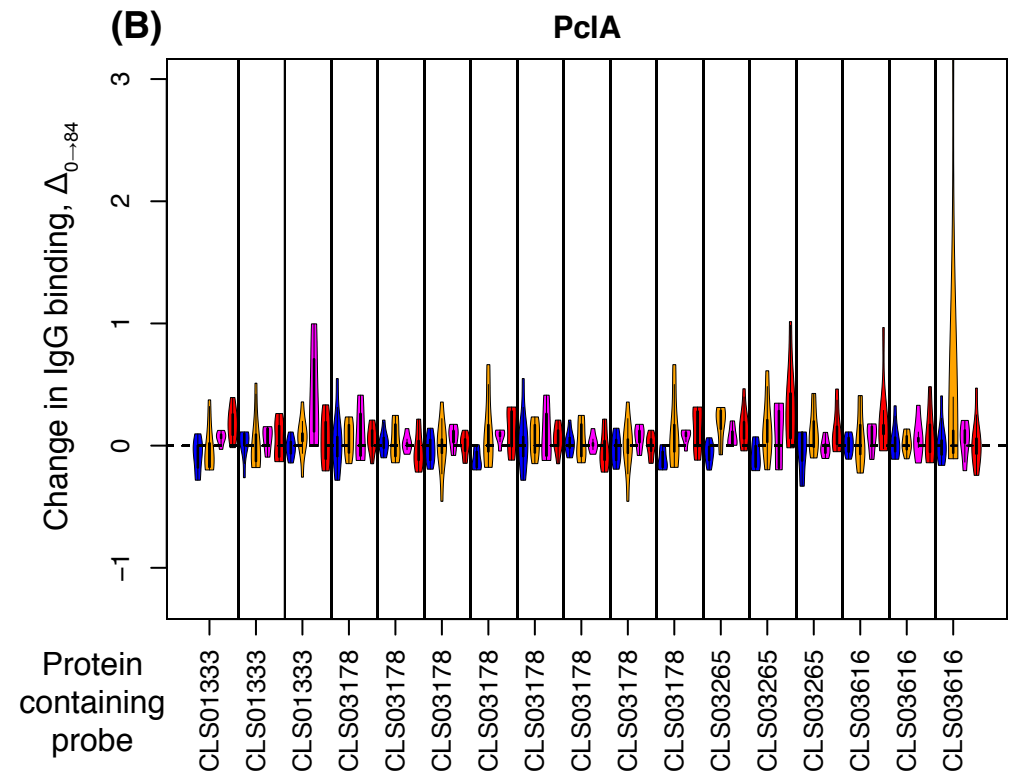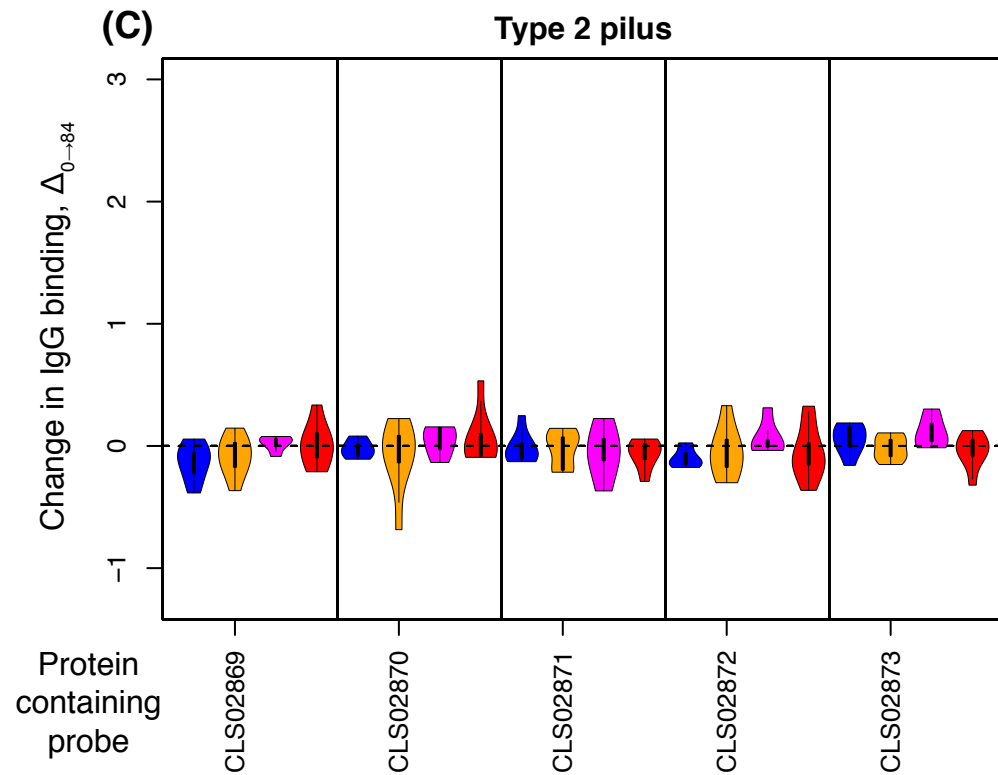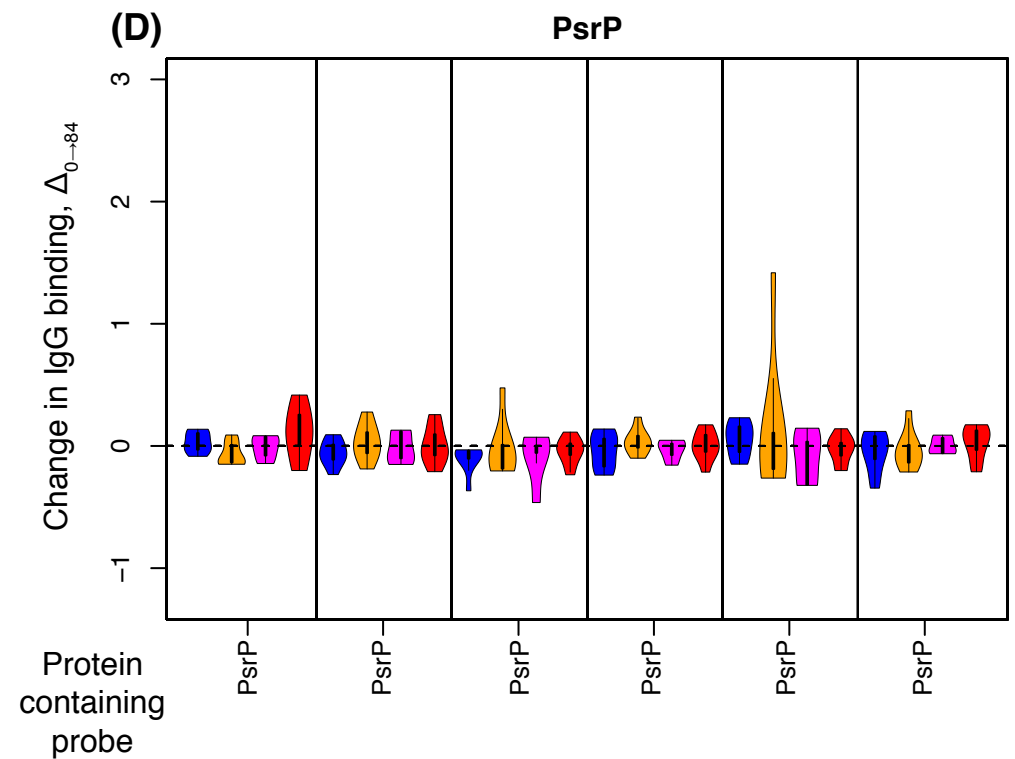

Supplement: supp [file elife_poa_e37015_Figure_4_figure_supplement_14.pdf › elife_poa_e37015_Figure_4_figure_supplement_14.pdf]

Figure 4-figure supplement 15

Degradative

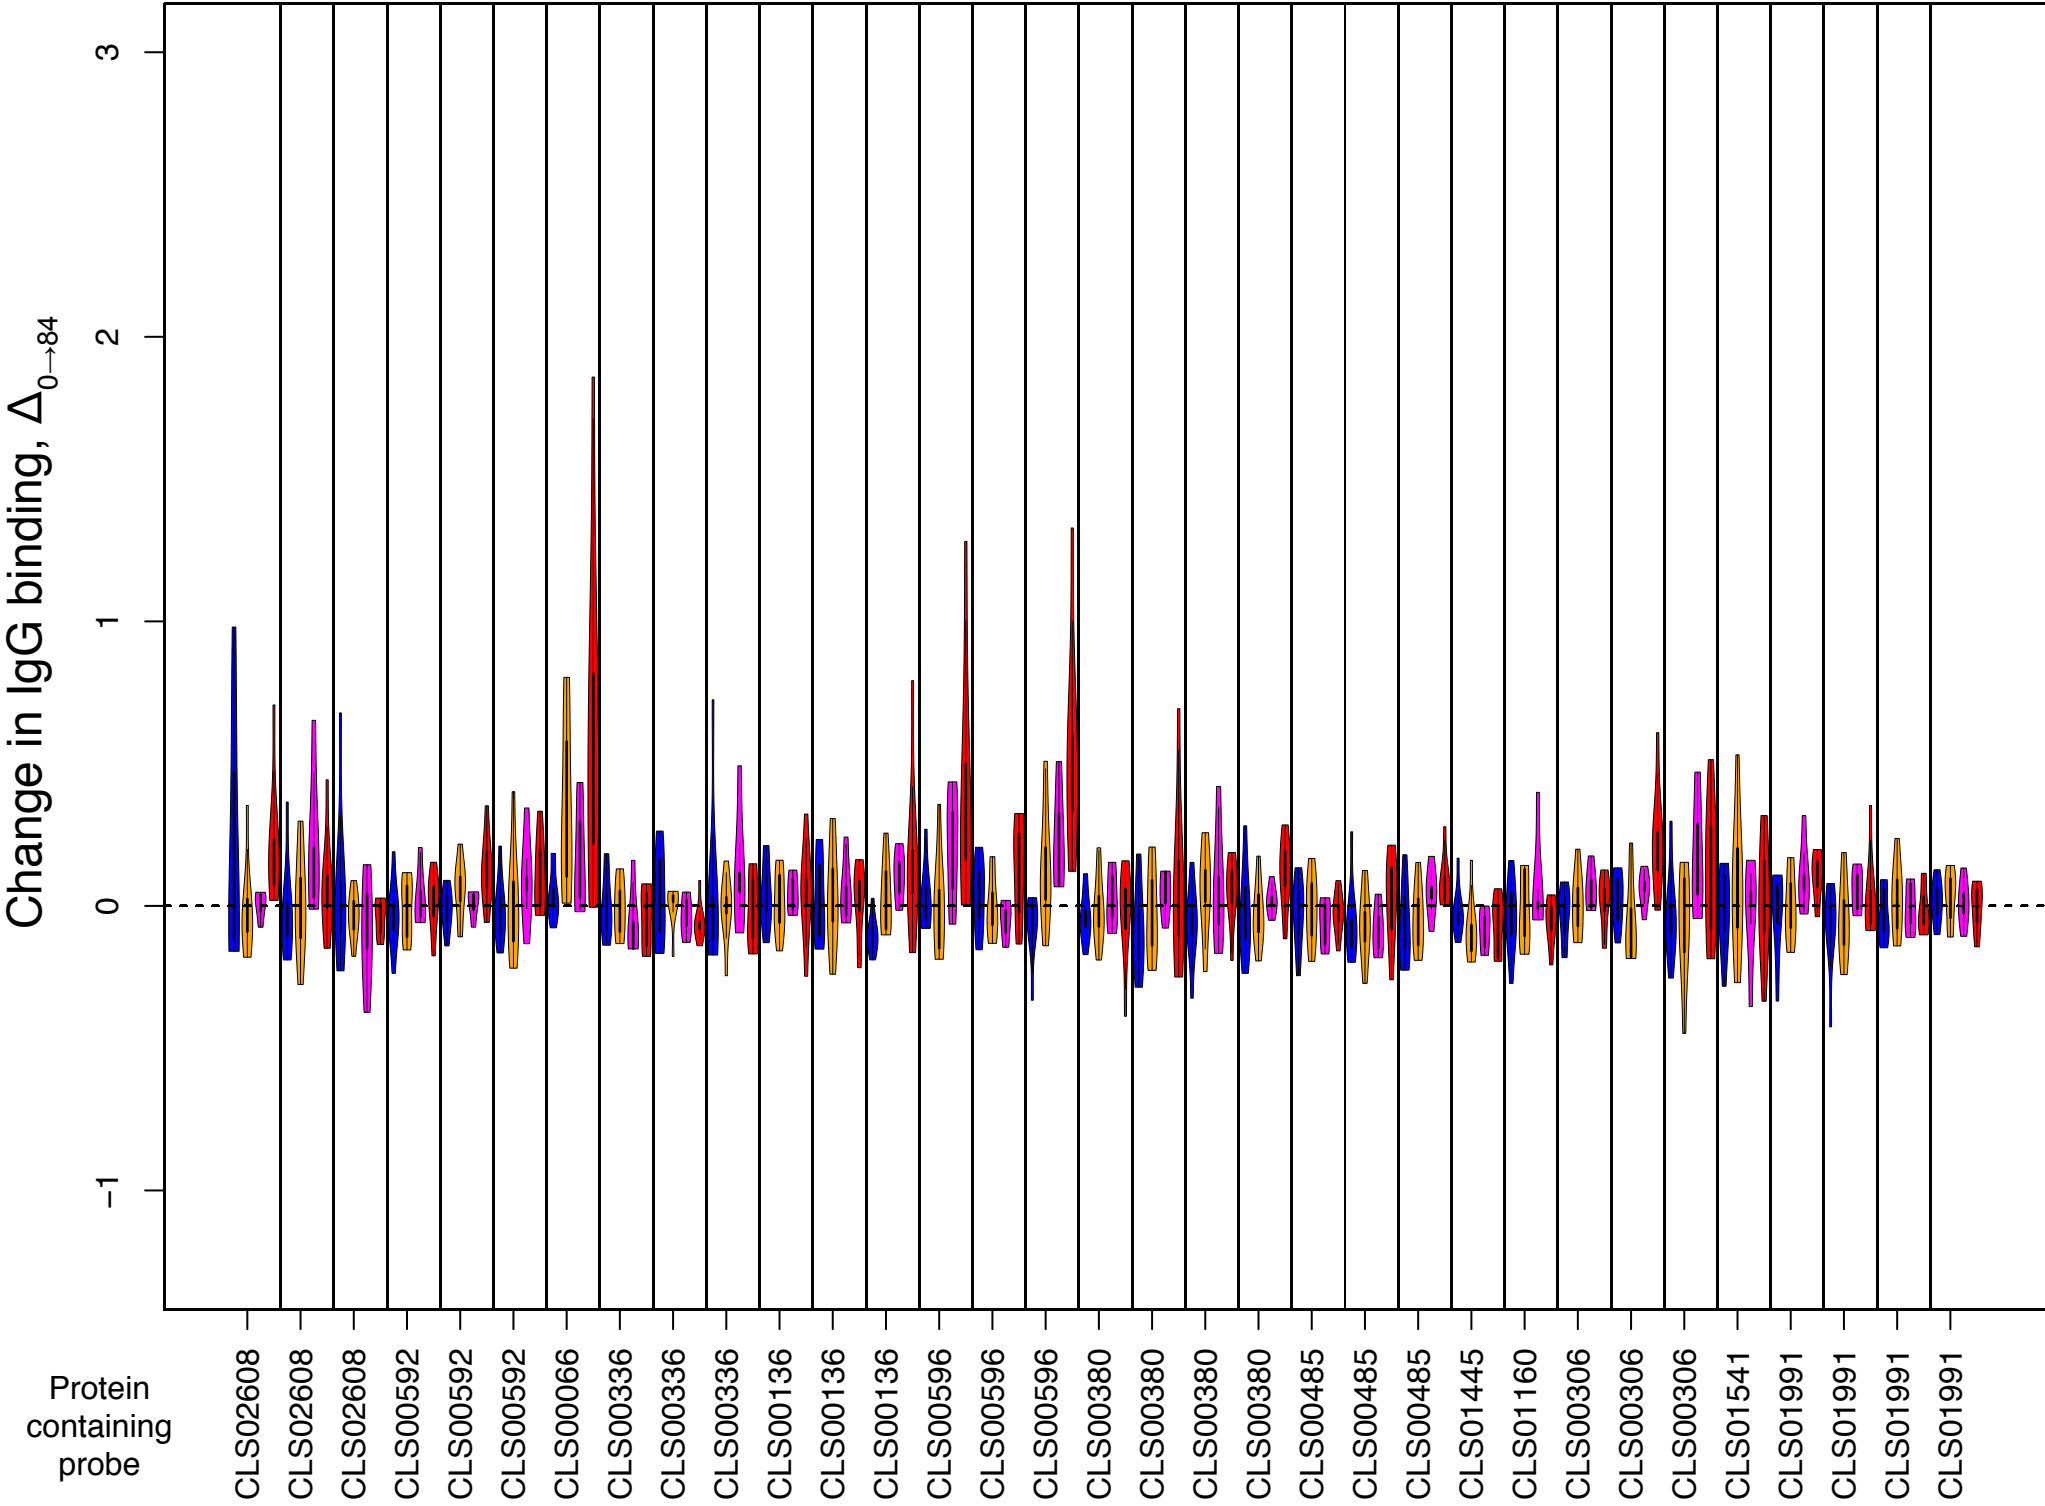

Supplement: supp [file elife_poa_e37015_Figure_4_figure_supplement_15.pdf › elife_poa_e37015_Figure_4_figure_supplement_15.pdf]

Figure 4-figure supplement 2

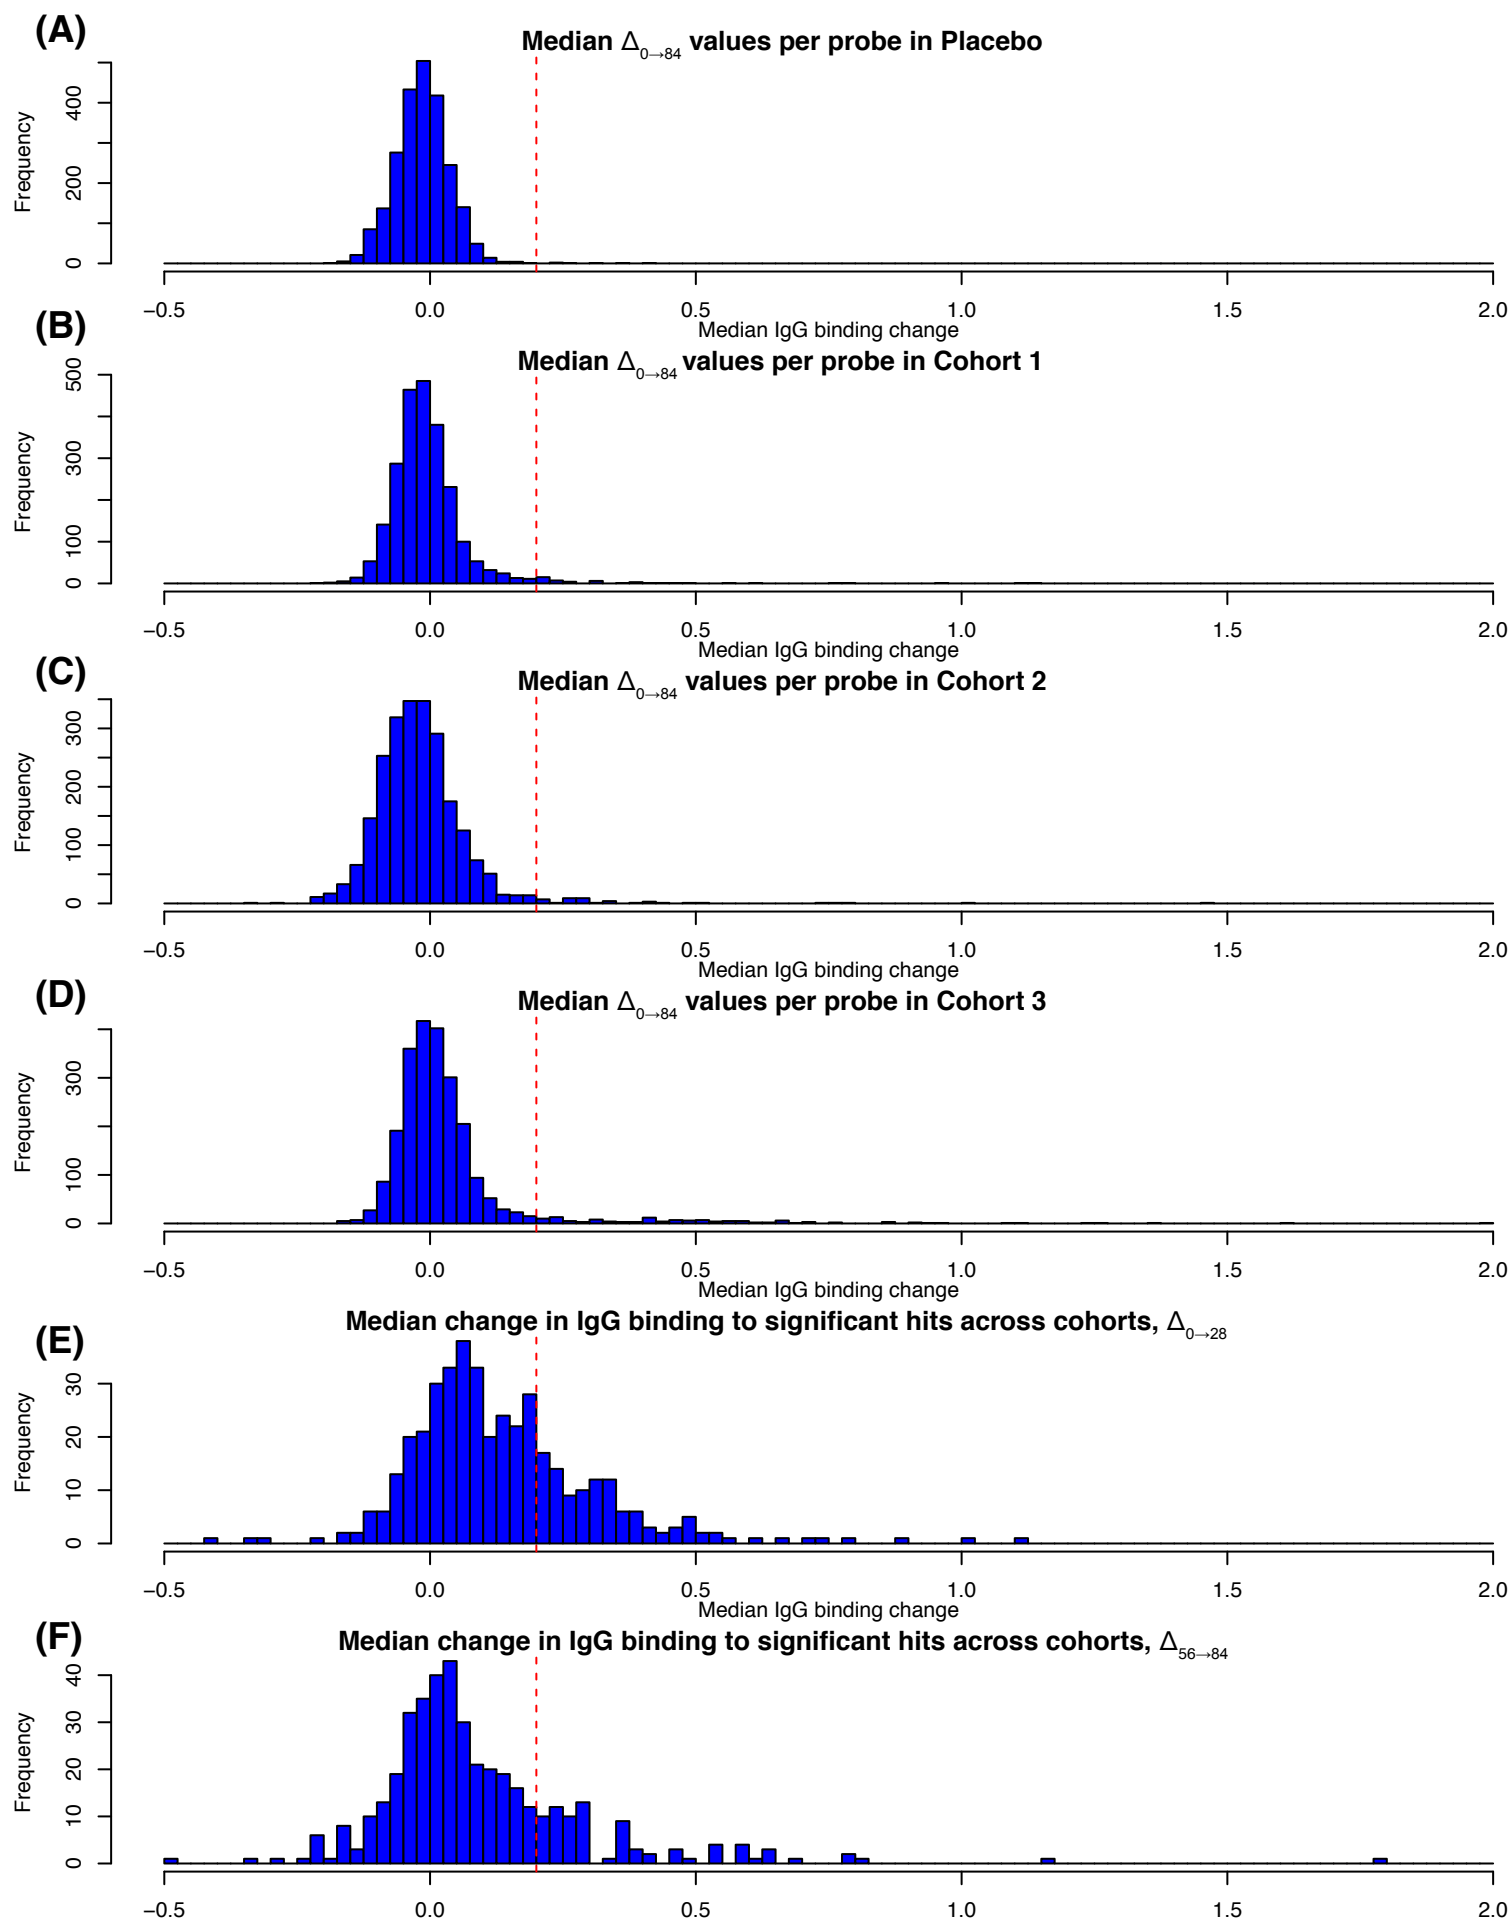

Supplement: supp [file elife_poa_e37015_Figure_4_figure_supplement_2.pdf › elife_poa_e37015_Figure_4_figure_supplement_2.pdf]

Figure 4-figure supplement 3

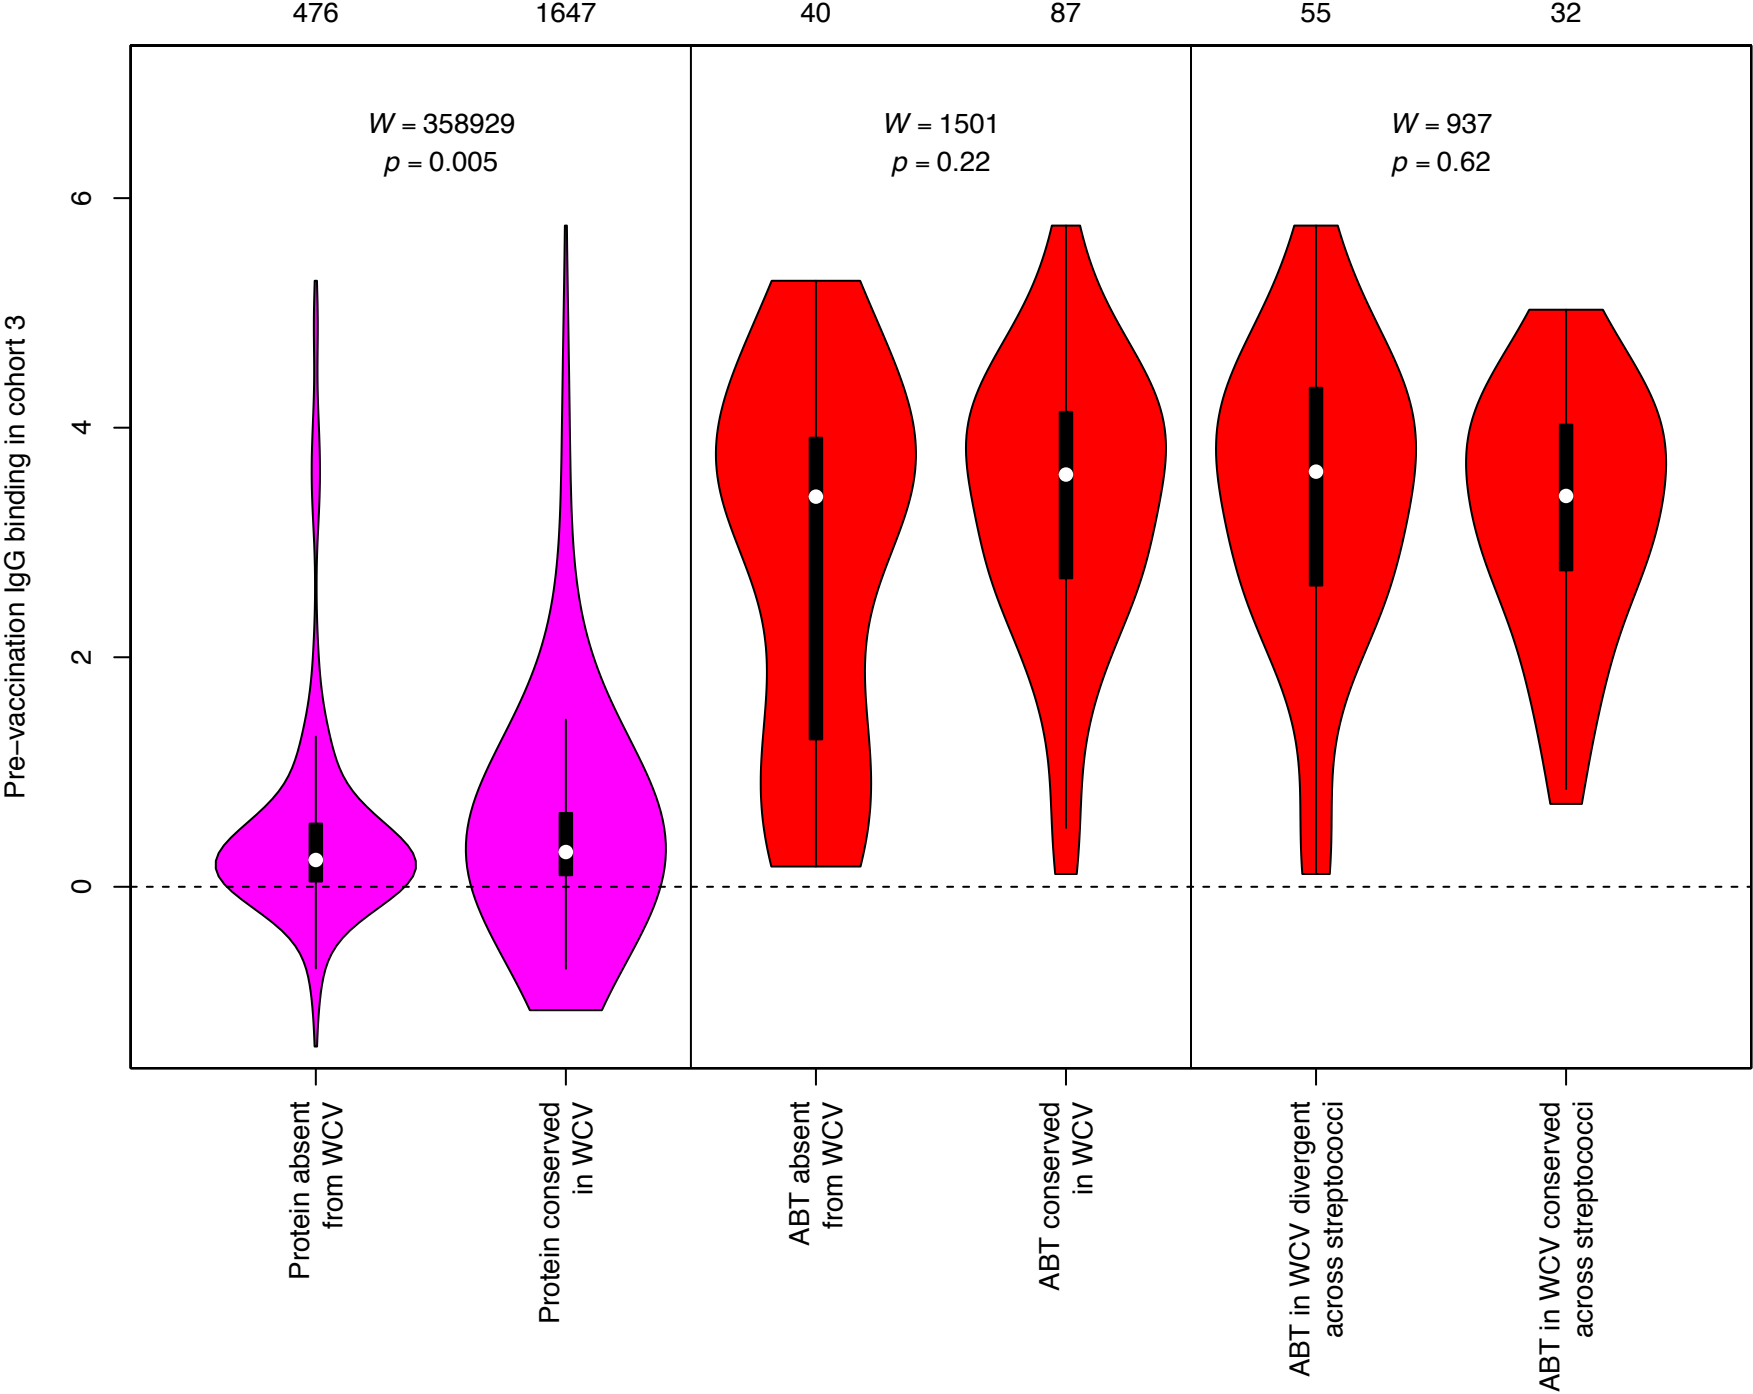

Supplement: supp [file elife_poa_e37015_Figure_4_figure_supplement_3.pdf › elife_poa_e37015_Figure_4_figure_supplement_3.pdf]

Figure 4-figure supplement 4

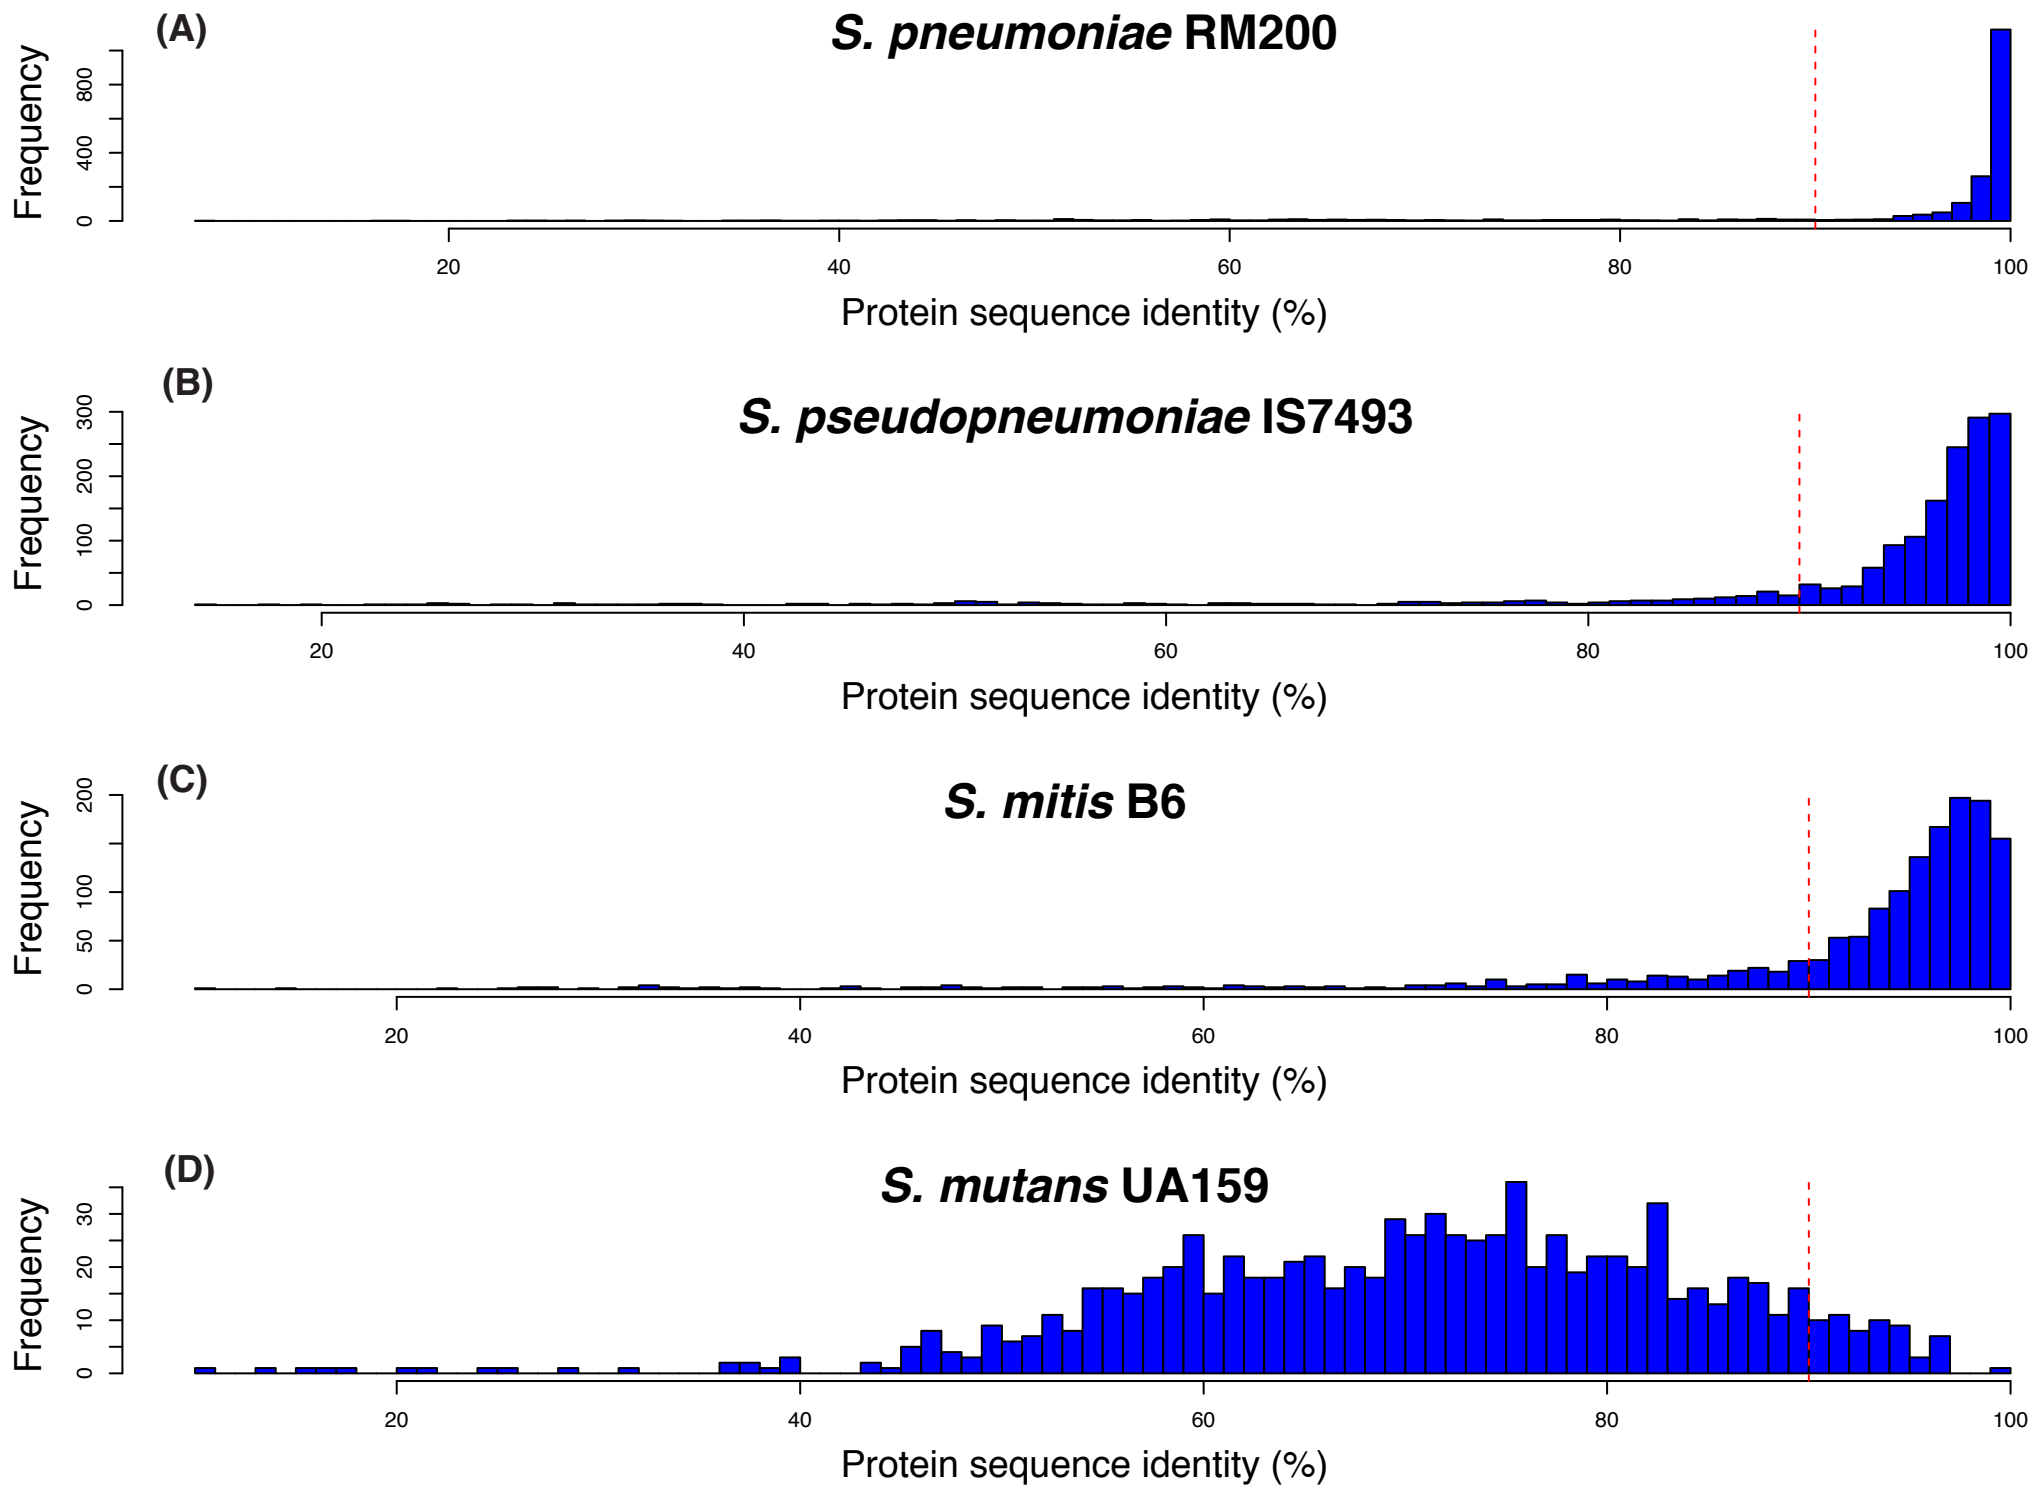

Supplement: supp [file elife_poa_e37015_Figure_4_figure_supplement_4.pdf › elife_poa_e37015_Figure_4_figure_supplement_4.pdf]

Figure 4-figure supplement 5

**Placebo**

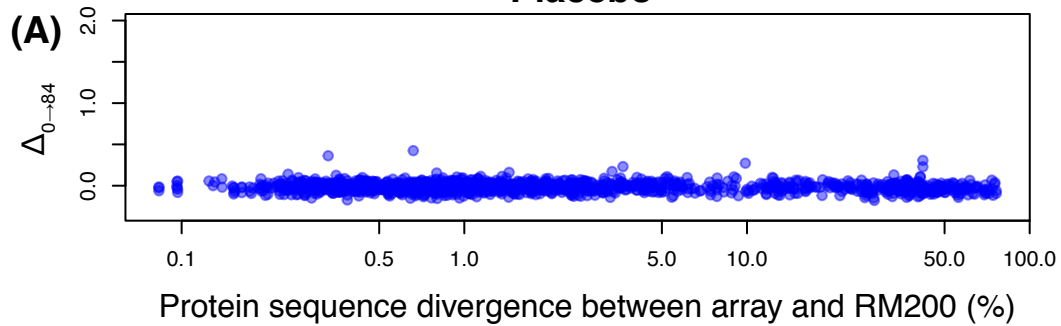

**Placebo**

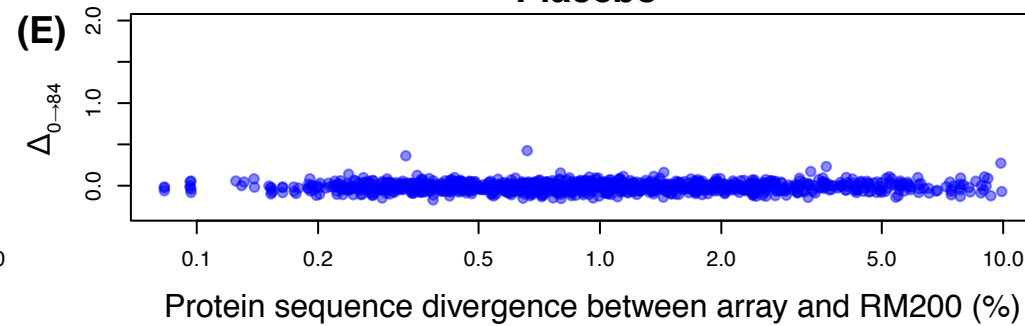

**Cohort 1**

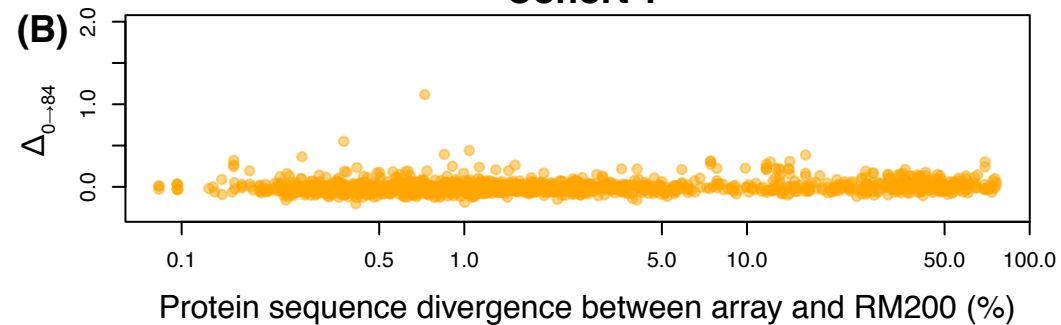

**Cohort 1**

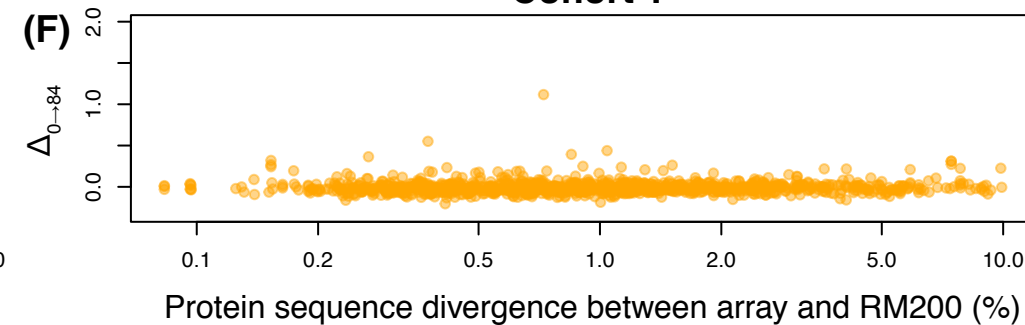

**Cohort 2**

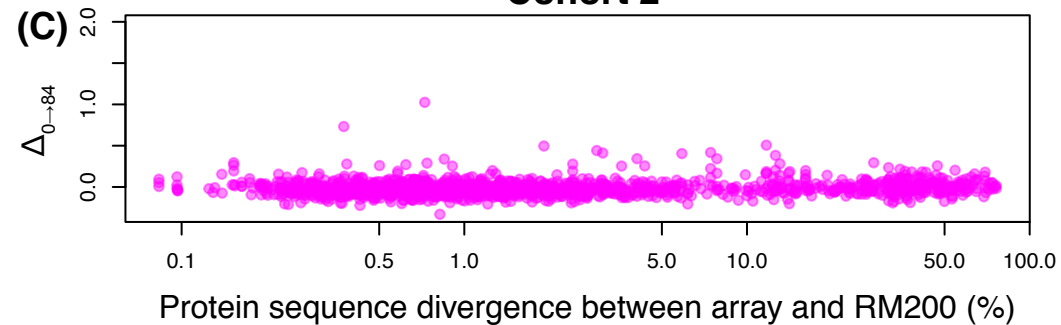

**Cohort 2**

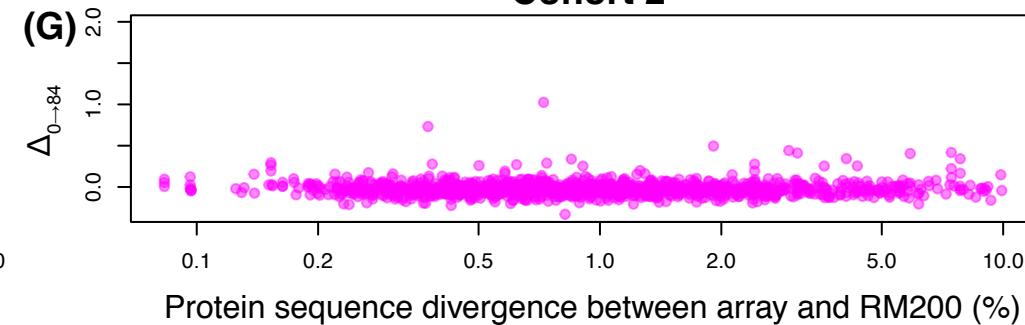

**Cohort 3**

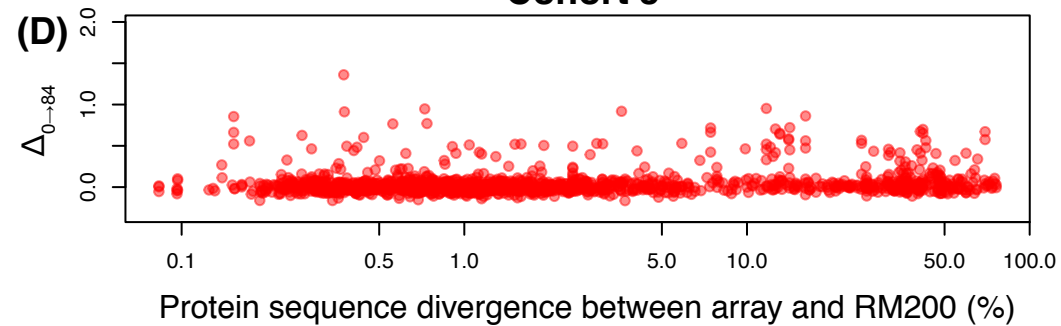

**Cohort 3**

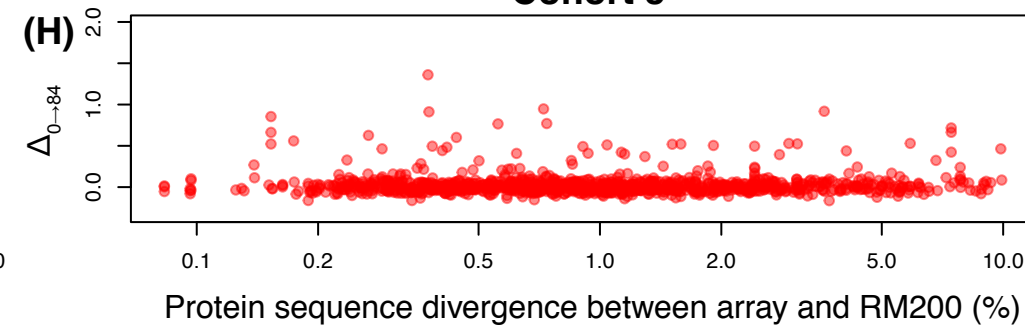

Supplement: supp [file elife_poa_e37015_Figure_4_figure_supplement_5.pdf › elife_poa_e37015_Figure_4_figure_supplement_5.pdf]

Figure 4-figure supplement 6

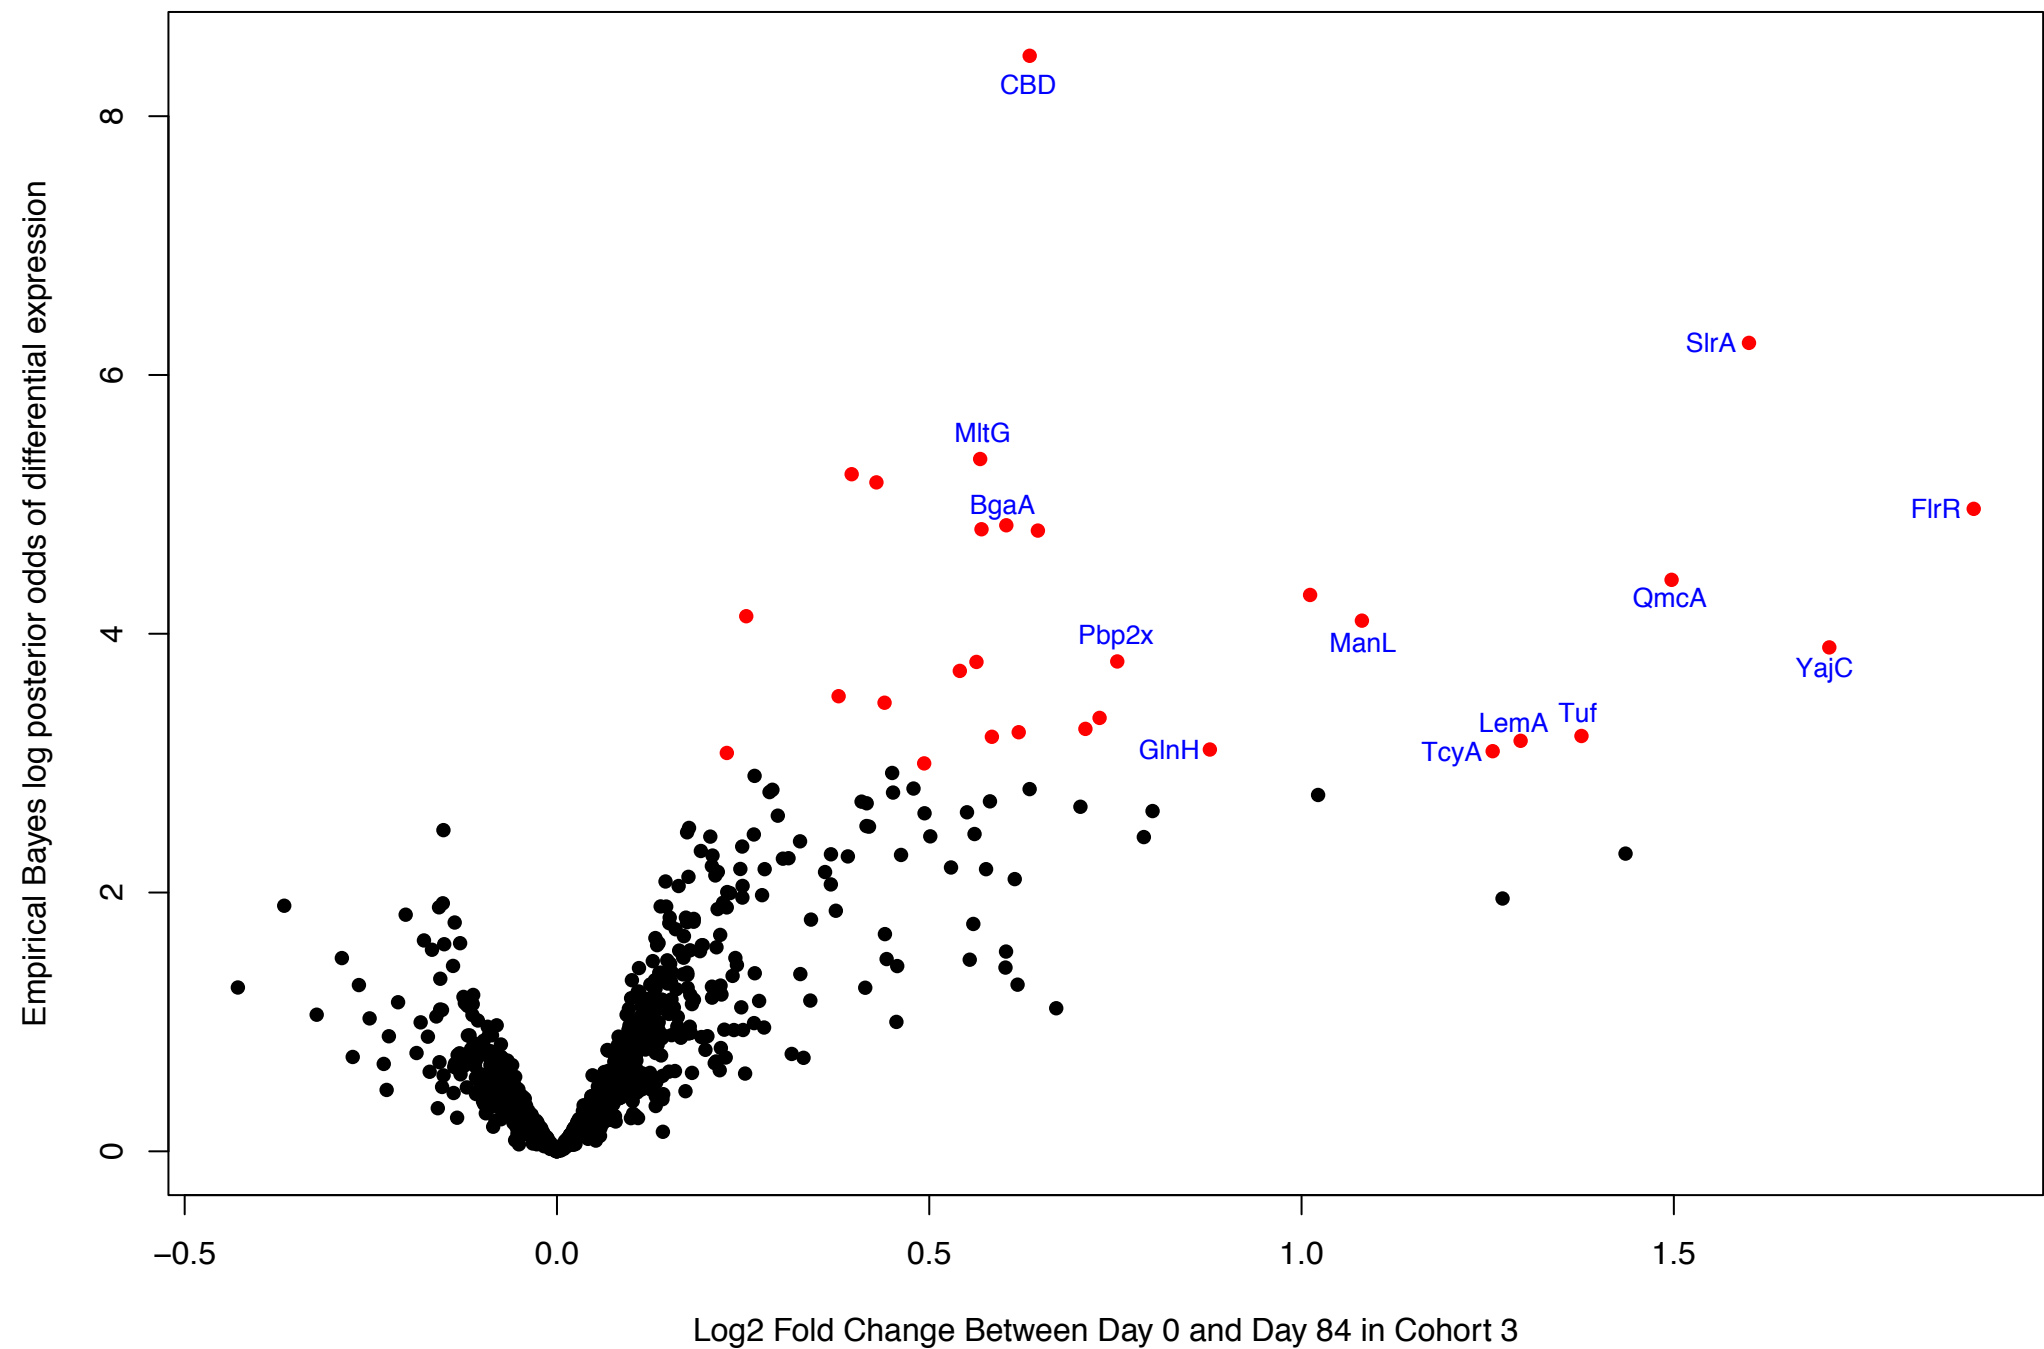

Supplement: supp [file elife_poa_e37015_Figure_4_figure_supplement_6.pdf › elife_poa_e37015_Figure_4_figure_supplement_6.pdf]

Figure 4-figure supplement 7

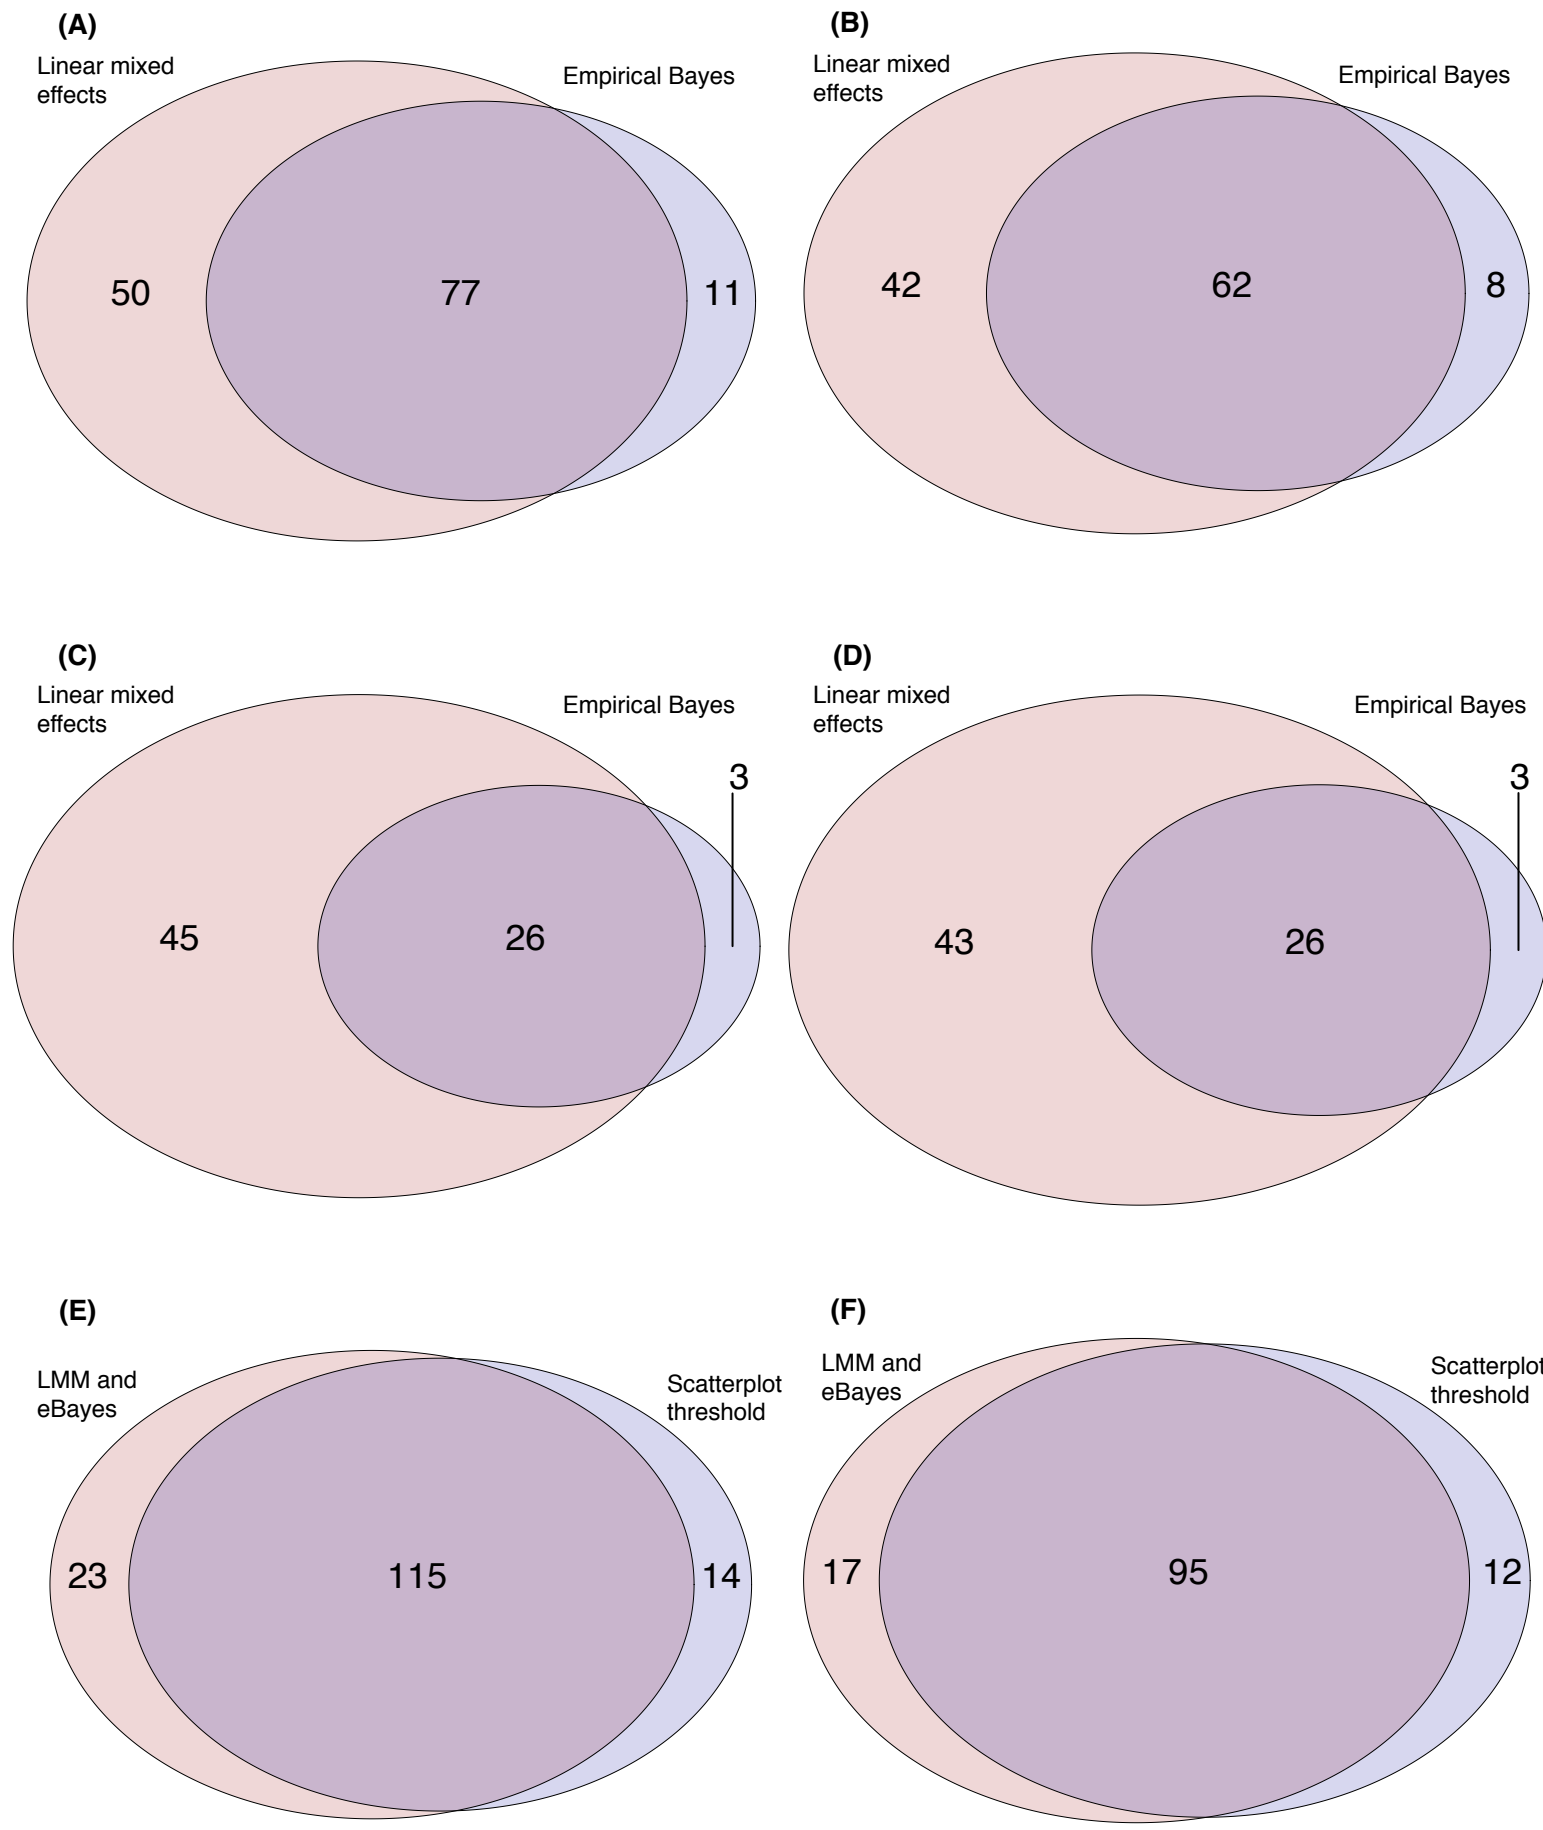

Supplement: supp [file elife_poa_e37015_Figure_4_figure_supplement_7.pdf › elife_poa_e37015_Figure_4_figure_supplement_7.pdf]

Figure 4-figure supplement 8

SBP

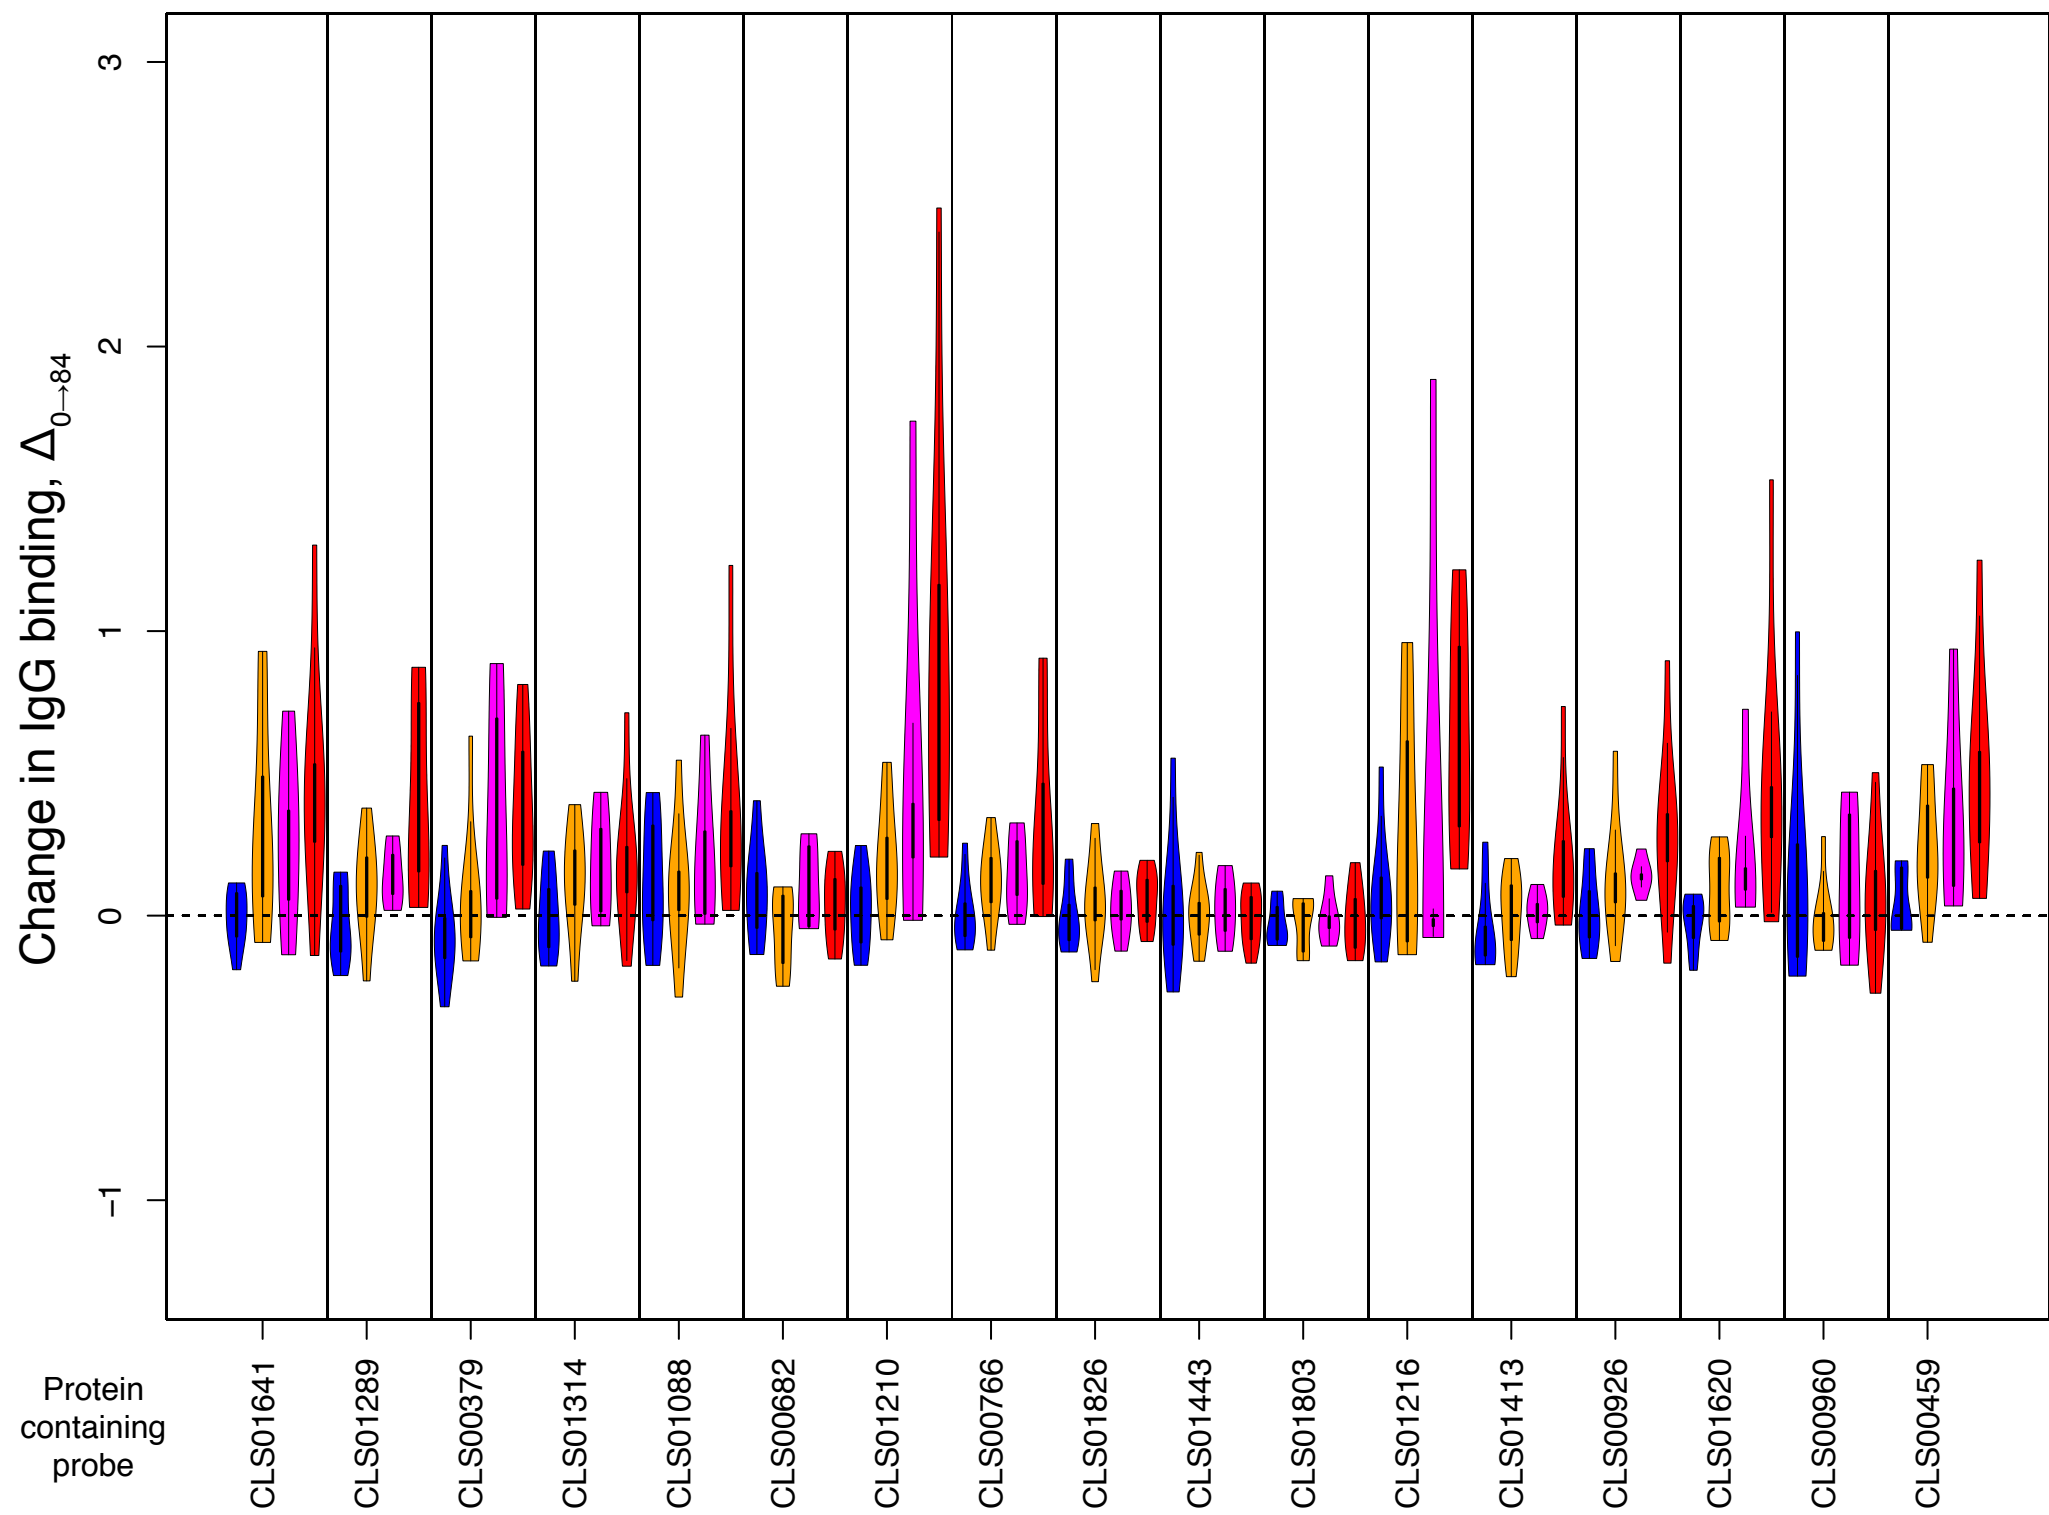

Supplement: supp [file elife_poa_e37015_Figure_4_figure_supplement_8.pdf › elife_poa_e37015_Figure_4_figure_supplement_8.pdf]

Figure 4-figure supplement 9

Cell Wall

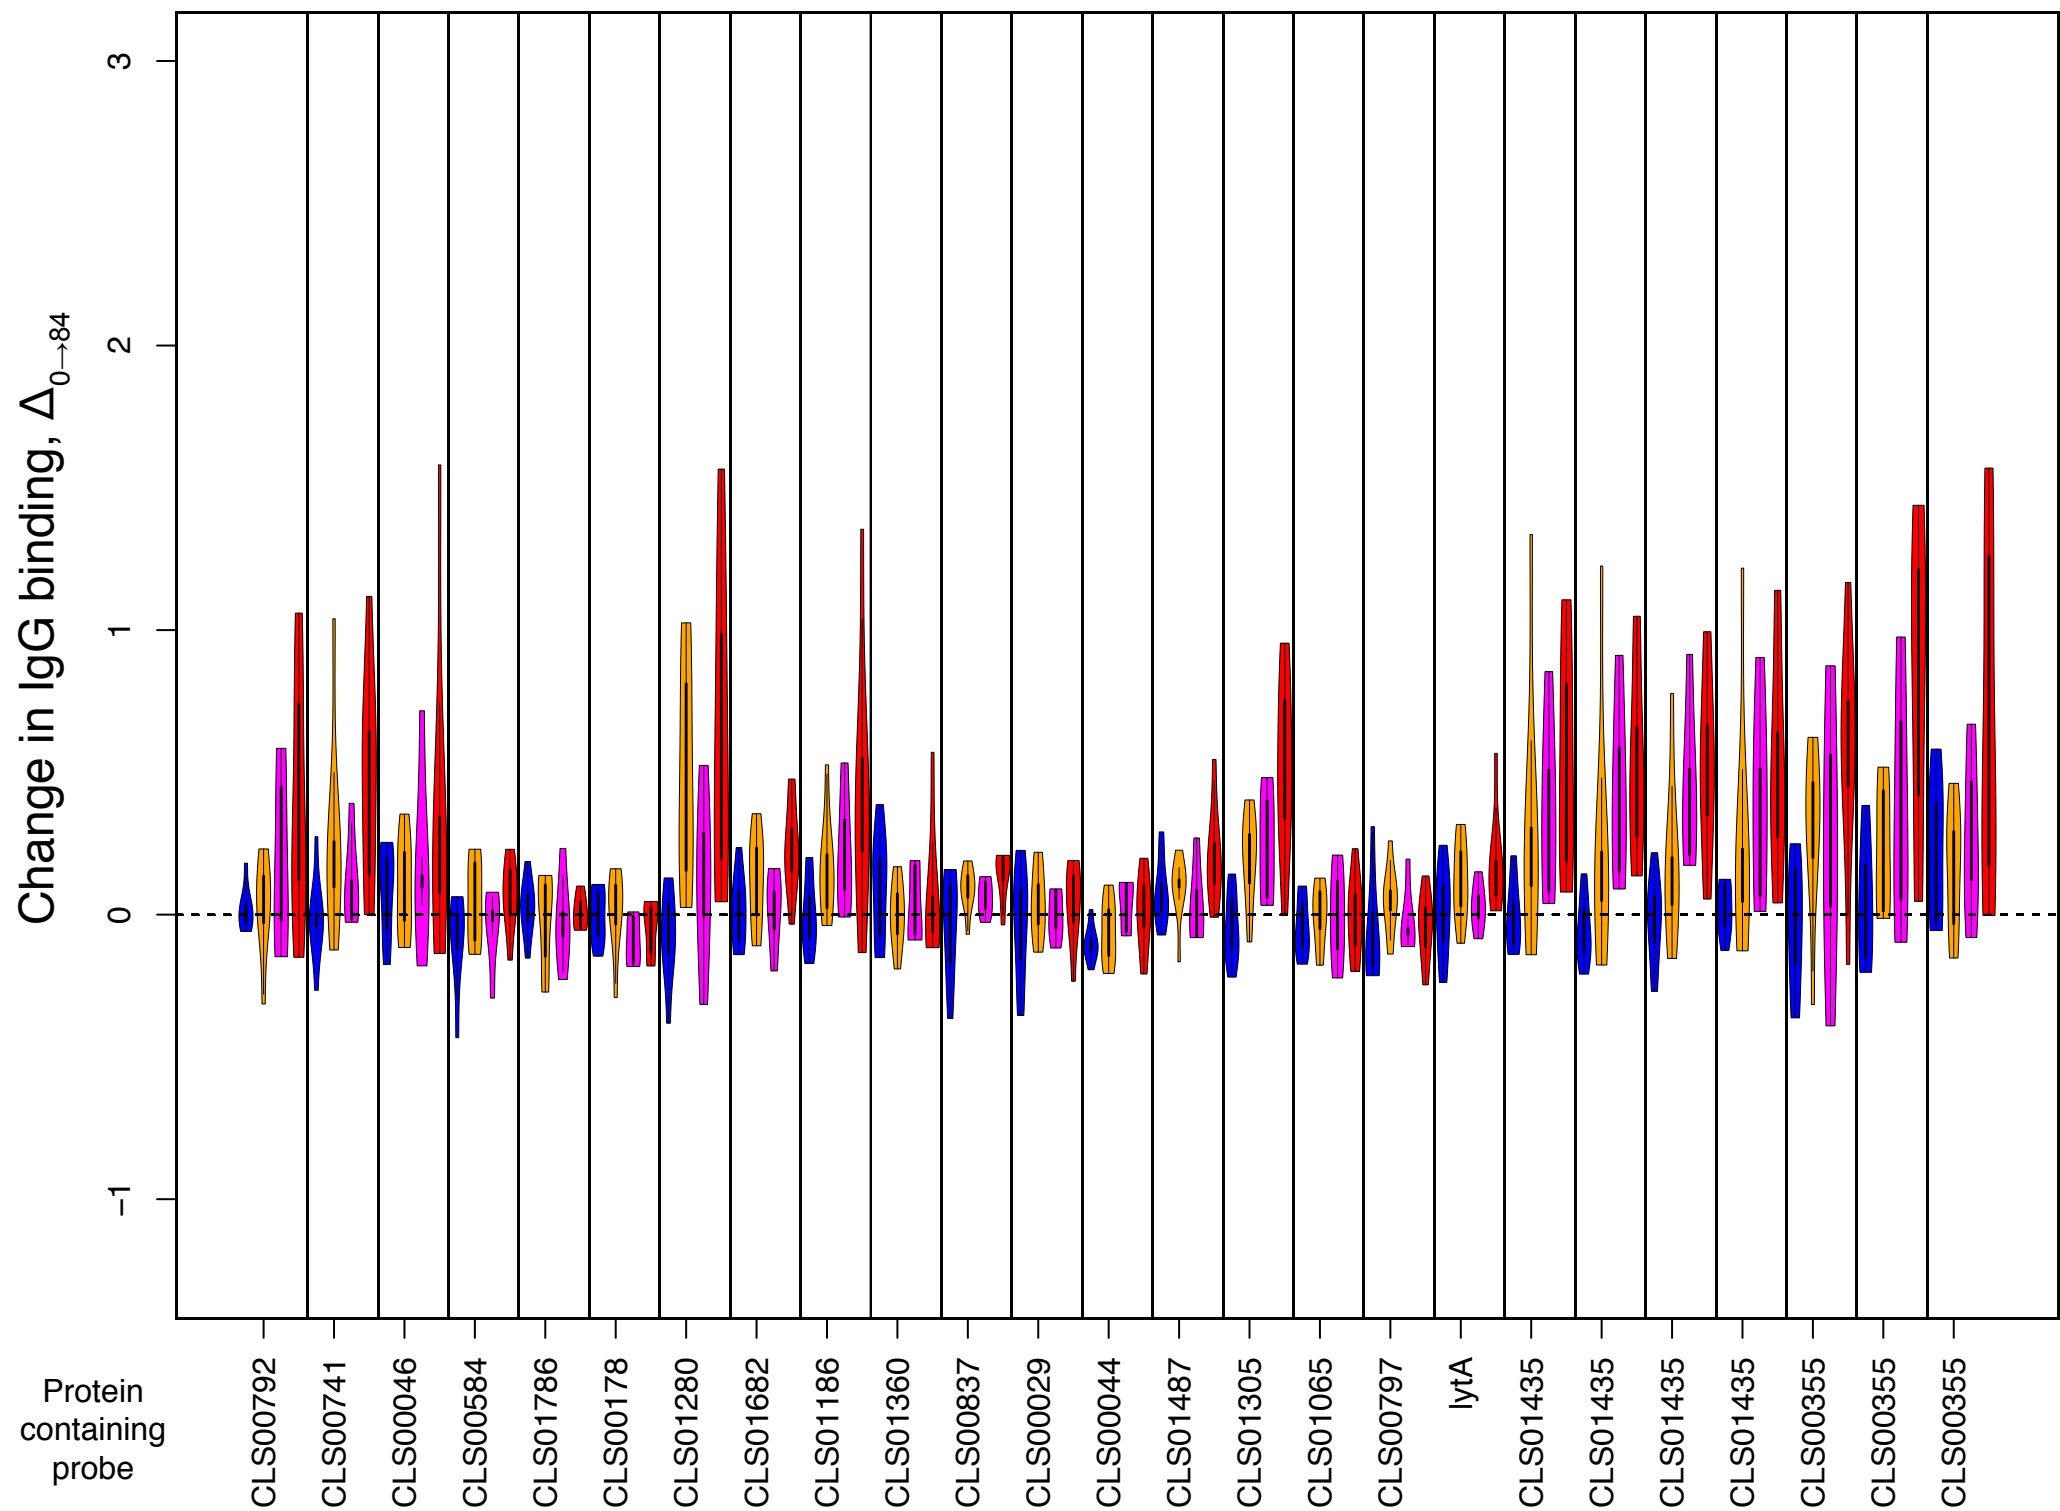

Supplement: supp [file elife_poa_e37015_Figure_4_figure_supplement_9.pdf › elife_poa_e37015_Figure_4_figure_supplement_9.pdf]
